# Supplementary material for: Intraspecific functional and genetic diversity ofPetriella setifera
Source: PeerJ journal article supplement (doi:10.7717/peerj.4420), 2018-02-28

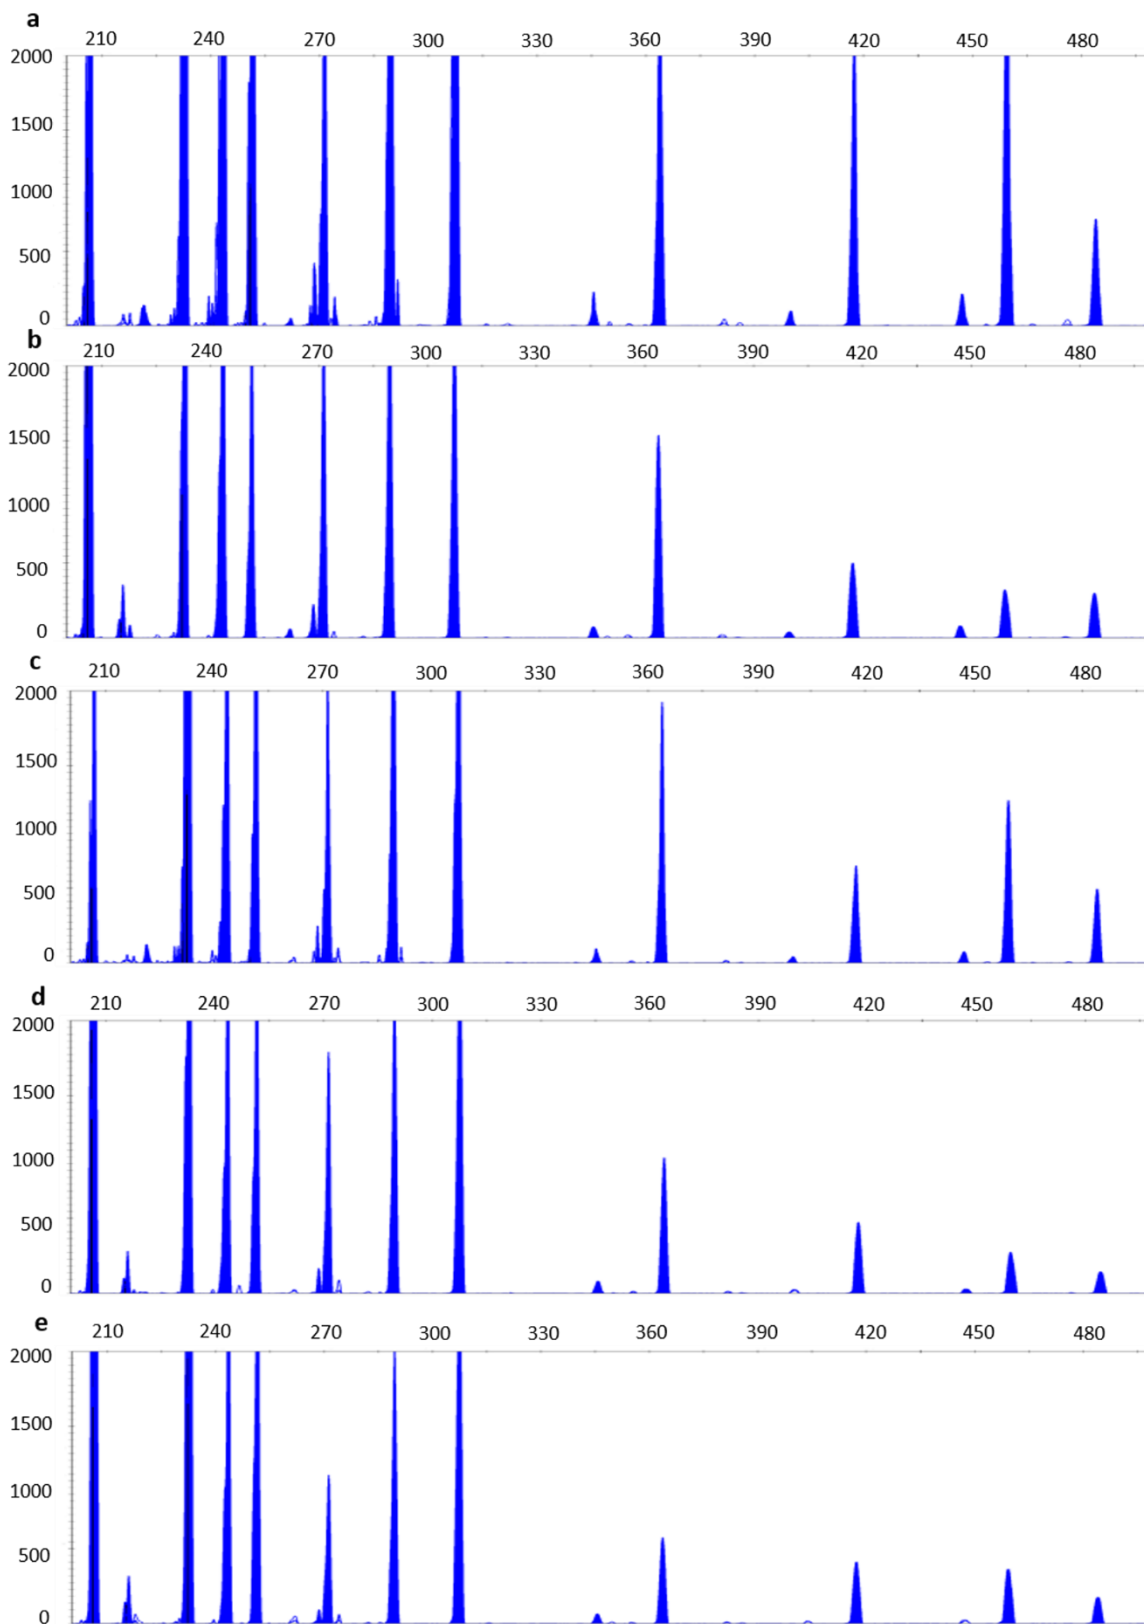

Supplement: Figure_S1.pdf [file Figure_S1.pdf]
