# Supplementary material for: Intraspecific functional and genetic diversity of Petriella setifera
Source: PeerJ. 2018 Feb 28;6:e4420. doi: 10.7717/peerj.4420 (PMC5834937; doi:10.7717/peerj.4420)
Supplement: Supplemental Information 2 [file peerj-06-4420-s004.xlsx]

## Sheet: G11A
RepA1-0h	OD												RepA2-0h	OD												RepA3-0h	OD
0	0.033	0.012	0	0.013	0.006	0.025	0.003	0.019	0.014	0.035	0.027		0	0.035	0.013	0	0.013	0.007	0.025	0.003	0.019	0.014	0.035	0.027		0	0.033	0.011	0	0.013	0.006	0.025	0.003	0.019	0.014	0.034	0.026
-0.016	-0.007	0.069	-0.038	-0.033	-0.03	-0.024	-0.025	-0.027	-0.006	0.007	-0.005		-0.016	-0.006	0.07	-0.037	-0.033	-0.029	-0.023	-0.025	-0.027	-0.006	0.007	-0.005		-0.016	-0.007	0.069	-0.037	-0.033	-0.03	-0.024	-0.025	-0.027	-0.007	0.007	-0.005
-0.014	-0.017	-0.016	-0.014	-0.006	-0.012	0.004	-0.023	-0.02	-0.017	-0.017	-0.016		-0.013	-0.016	-0.015	-0.014	-0.006	-0.012	0.005	-0.023	-0.019	-0.017	-0.017	-0.016		-0.014	-0.017	-0.016	-0.015	-0.006	-0.012	0.004	-0.023	-0.02	-0.017	-0.017	-0.016
-0.027	-0.029	-0.023	-0.028	-0.02	-0.026	-0.014	-0.028	-0.024	-0.021	-0.022	-0.022		-0.027	-0.028	-0.022	-0.028	-0.019	-0.026	-0.014	-0.028	-0.024	-0.022	-0.022	-0.022		-0.027	-0.029	-0.023	-0.028	-0.02	-0.026	-0.015	-0.028	-0.024	-0.021	-0.022	-0.022
-0.005	-0.008	-0.008	0.009	0.003	-0.016	0.008	-0.011	-0.01	-0.016	-0.009	-0.006		-0.004	-0.008	-0.008	0.009	0.003	-0.015	0.009	-0.011	-0.01	-0.016	-0.01	-0.006		-0.005	-0.009	-0.009	0.009	0.003	-0.016	0.008	-0.011	-0.01	-0.016	-0.009	-0.006
-0.032	-0.031	-0.026	-0.032	-0.033	-0.035	-0.021	-0.021	-0.025	-0.027	-0.031	-0.031		-0.032	-0.031	-0.025	-0.032	-0.033	-0.035	-0.021	-0.02	-0.025	-0.027	-0.031	-0.031		-0.032	-0.031	-0.026	-0.032	-0.033	-0.035	-0.021	-0.02	-0.025	-0.027	-0.031	-0.031
-0.027	0.376	-0.029	-0.029	-0.025	-0.028	-0.019	-0.027	-0.026	-0.034	-0.031	-0.027		-0.027	0.376	-0.029	-0.029	-0.025	-0.028	-0.019	-0.027	-0.026	-0.035	-0.031	-0.027		-0.027	0.375	-0.029	-0.03	-0.026	-0.028	-0.019	-0.027	-0.026	-0.035	-0.031	-0.027
-0.031	-0.018	0.061	-0.023	-0.02	-0.034	-0.021	-0.02	-0.016	1.539	-0.037	-0.029		-0.031	-0.018	0.065	-0.023	-0.02	-0.033	-0.021	-0.02	-0.016	1.533	-0.037	-0.029		-0.031	-0.019	0.061	-0.023	-0.02	-0.034	-0.021	-0.02	-0.016	1.543	-0.037	-0.029
RepA1-24h	OD												RepA2-24h	OD												RepA3-24h	OD
0	0.049	-0.007	0.021	0.001	0.013	0.034	-0.001	0.024	0.043	0.043	0.064		0	0.048	-0.007	0.021	0	0.013	0.034	-0.001	0.023	0.043	0.043	0.064		0	0.049	-0.007	0.021	0.001	0.013	0.034	-0.001	0.023	0.043	0.043	0.064
0.015	0.008	0.158	0.006	0.046	-0.03	0.039	-0.069	0.041	0.034	-0.04	0.067		0.015	0.009	0.158	0.004	0.044	-0.033	0.036	-0.072	0.037	0.031	-0.04	0.067		0.015	0.009	0.159	0.008	0.049	-0.027	0.042	-0.065	0.045	0.038	-0.039	0.067
-0.007	-0.036	0.029	0.032	0.088	0.024	0.028	0.008	0.004	-0.006	0.032	0.047		-0.007	-0.036	0.026	0.028	0.084	0.02	0.023	0.004	-0.001	-0.01	0.03	0.047		-0.007	-0.036	0.032	0.036	0.092	0.028	0.032	0.012	0.009	-0.002	0.035	0.047
0.023	0.064	0.009	0	0.005	0.019	0.027	0.03	0.018	0.02	-0.015	-0.002		0.023	0.063	0.005	-0.004	0.001	0.015	0.022	0.026	0.013	0.015	-0.018	-0.003		0.023	0.065	0.012	0.004	0.009	0.023	0.031	0.035	0.023	0.025	-0.012	-0.002
-0.037	0.034	0.021	0.081	0.032	0.008	0.141	-0.028	0.087	0.02	0.018	0.032		-0.038	0.033	0.017	0.077	0.028	0.004	0.137	-0.032	0.083	0.015	0.015	0.032		-0.037	0.037	0.025	0.085	0.036	0.013	0.145	-0.024	0.091	0.025	0.02	0.033
-0.026	-0.065	-0.007	-0.01	0.03	-0.023	0.009	0.013	0.005	-0.003	-0.023	-0.018		-0.026	-0.066	-0.011	-0.014	0.026	-0.027	0.005	0.008	0	-0.008	-0.025	-0.018		-0.026	-0.064	-0.003	-0.007	0.034	-0.02	0.013	0.017	0.009	0.001	-0.022	-0.018
-0.031	0.217	-0.012	-0.002	-0.062	-0.008	0.016	0.04	0.017	-0.013	-0.015	-0.01		-0.031	0.216	-0.014	-0.005	-0.066	-0.011	0.013	0.036	0.013	-0.016	-0.016	-0.01		-0.031	0.217	-0.009	0.002	-0.059	-0.004	0.02	0.044	0.021	-0.009	-0.015	-0.01
-0.008	-0.006	0.052	-0.027	-0.046	-0.02	-0.026	-0.022	-0.007	0.149	-0.029	-0.043		-0.008	-0.006	0.051	-0.028	-0.047	-0.02	-0.026	-0.022	-0.007	0.151	-0.03	-0.044		-0.008	-0.006	0.052	-0.027	-0.046	-0.02	-0.026	-0.022	-0.007	0.148	-0.029	-0.043
RepA1-48h	OD												RepA2-48h	OD												RepA3-48h	OD
0	0.292	0.013	0.215	0.029	0.056	0.157	0.065	0.186	0.128	0.169	0.258		0	0.293	0.006	0.205	0.017	0.046	0.147	0.053	0.175	0.121	0.167	0.258		0	0.294	0.019	0.223	0.038	0.064	0.166	0.075	0.195	0.134	0.172	0.259
0.017	0.125	0.402	0.055	0.31	0.029	0.295	-0.046	0.282	0.195	0.071	0.305		0.018	0.109	0.388	0.039	0.296	0.015	0.282	-0.057	0.269	0.181	0.06	0.304		0.018	0.138	0.415	0.067	0.321	0.04	0.306	-0.037	0.294	0.207	0.08	0.306
0.001	0.028	0.317	0.107	0.306	0.063	0.071	0.16	0.055	0.129	0.276	0.304		0.001	0.013	0.3	0.091	0.293	0.049	0.056	0.147	0.04	0.116	0.262	0.303		0.003	0.041	0.331	0.121	0.318	0.075	0.084	0.171	0.067	0.14	0.288	0.307
0.223	0.36	0.088	0.043	0.046	0.186	0.114	0.271	0.307	0.14	0.023	0.13		0.223	0.341	0.071	0.027	0.03	0.171	0.099	0.257	0.291	0.125	0.007	0.13		0.225	0.374	0.102	0.057	0.06	0.198	0.127	0.282	0.32	0.153	0.037	0.132
0.009	0.194	0.067	0.273	0.155	0.051	0.429	0.014	0.333	0.075	0.098	0.255		0.009	0.172	0.05	0.256	0.14	0.035	0.413	0	0.318	0.059	0.082	0.254		0.011	0.211	0.081	0.286	0.168	0.065	0.441	0.025	0.346	0.088	0.112	0.257
0.013	0.024	0.066	0.118	0.104	0.082	0.053	0.082	0.07	0.051	0.027	0.486		0.013	0.005	0.048	0.101	0.09	0.066	0.037	0.066	0.053	0.036	0.01	0.484		0.014	0.038	0.081	0.133	0.116	0.095	0.067	0.096	0.083	0.064	0.041	0.488
-0.031	0.251	0.067	0.057	0.018	0.044	0.061	0.343	0.281	0.098	0.262	0.193		-0.033	0.229	0.047	0.039	0.002	0.026	0.041	0.325	0.263	0.081	0.243	0.193		-0.028	0.268	0.082	0.072	0.031	0.059	0.076	0.358	0.295	0.113	0.277	0.195
0.073	0.082	0.122	0.051	0.033	0.092	0.005	0.03	0.01	0.218	-0.014	-0.035		0.073	0.067	0.104	0.036	0.018	0.079	-0.006	0.019	-0.001	0.213	-0.02	-0.035		0.074	0.091	0.133	0.063	0.045	0.101	0.014	0.04	0.02	0.222	-0.009	-0.034
RepA1-72h	OD												RepA2-72h	OD												RepA3-72h	OD
0	0.417	0.005	0.734	0.018	0.058	0.291	0.079	0.364	0.148	0.347	0.372		0	0.416	0.001	0.727	0.007	0.05	0.282	0.068	0.356	0.144	0.347	0.372		0	0.417	0.009	0.74	0.026	0.065	0.298	0.087	0.371	0.152	0.347	0.372
0.012	0.11	0.437	0.039	0.539	-0.003	0.565	-0.049	0.457	0.301	0.191	0.422		0.012	0.096	0.423	0.023	0.527	-0.017	0.554	-0.059	0.444	0.288	0.177	0.424		0.012	0.122	0.448	0.05	0.549	0.008	0.575	-0.04	0.467	0.312	0.203	0.422
0.02	0.019	0.424	0.124	0.518	0.044	0.062	0.294	0.051	0.316	0.335	0.332		0.019	0	0.408	0.107	0.505	0.03	0.047	0.282	0.037	0.303	0.321	0.332		0.02	0.031	0.437	0.137	0.529	0.055	0.073	0.304	0.062	0.326	0.346	0.332
0.454	0.512	0.091	0.031	0.035	0.344	0.144	0.494	0.514	0.106	0.009	0.343		0.454	0.496	0.074	0.015	0.019	0.33	0.128	0.48	0.499	0.091	-0.007	0.344		0.455	0.525	0.105	0.044	0.048	0.355	0.156	0.505	0.527	0.118	0.022	0.343
0.02	0.238	0.055	0.439	0.229	0.039	0.607	0.014	0.393	0.083	0.112	0.472		0.02	0.215	0.038	0.423	0.213	0.023	0.594	-0.001	0.377	0.067	0.095	0.473		0.02	0.254	0.068	0.451	0.241	0.051	0.619	0.025	0.405	0.096	0.125	0.472
0.065	0.023	0.065	0.215	0.096	0.207	0.054	0.146	0.08	0.08	0.01	0.619		0.065	0.001	0.047	0.198	0.08	0.191	0.037	0.13	0.063	0.064	-0.006	0.62		0.066	0.038	0.078	0.228	0.108	0.219	0.067	0.159	0.094	0.093	0.024	0.619
-0.039	0.237	0.056	0.064	0.146	0.028	0.128	0.825	0.61	0.492	0.463	0.597		-0.039	0.219	0.038	0.046	0.127	0.01	0.11	0.808	0.592	0.474	0.451	0.597		-0.039	0.254	0.071	0.077	0.161	0.043	0.143	0.837	0.623	0.506	0.478	0.597
0.218	0.242	0.432	0.054	0.023	0.331	-0.009	0.019	0.015	0.127	-0.016	-0.038		0.217	0.24	0.419	0.04	0.009	0.321	-0.017	0.008	0.005	0.123	-0.017	-0.038		0.218	0.249	0.441	0.064	0.033	0.339	-0.002	0.027	0.023	0.132	-0.015	-0.038
RepA1-96h	OD												RepA2-96h	OD												RepA3-96h	OD
0	0.411	0.014	0.97	0.026	0.069	0.335	0.096	0.411	0.167	0.426	0.407		0	0.411	0.006	0.962	0.015	0.059	0.326	0.084	0.401	0.16	0.425	0.406		0	0.411	0.02	0.976	0.036	0.077	0.342	0.105	0.419	0.172	0.427	0.407
0.01	0.133	0.439	0.053	0.613	0.002	0.645	-0.043	0.483	0.364	0.245	0.421		0.01	0.118	0.425	0.039	0.6	-0.012	0.632	-0.054	0.47	0.35	0.23	0.42		0.01	0.146	0.452	0.067	0.625	0.014	0.656	-0.033	0.496	0.377	0.258	0.421
0.027	0.033	0.415	0.145	0.591	0.049	0.066	0.346	0.055	0.409	0.329	0.327		0.026	0.016	0.399	0.129	0.577	0.035	0.051	0.333	0.042	0.395	0.315	0.326		0.028	0.048	0.43	0.16	0.603	0.062	0.079	0.358	0.068	0.421	0.343	0.328
0.534	0.526	0.097	0.042	0.045	0.416	0.164	0.571	0.516	0.097	0.016	0.425		0.533	0.51	0.08	0.025	0.029	0.402	0.149	0.556	0.5	0.081	-0.001	0.424		0.535	0.542	0.113	0.057	0.059	0.429	0.178	0.584	0.531	0.112	0.032	0.425
0.021	0.247	0.058	0.518	0.272	0.043	0.649	0.023	0.449	0.104	0.134	0.523		0.019	0.226	0.041	0.503	0.256	0.027	0.634	0.008	0.433	0.087	0.117	0.521		0.021	0.265	0.074	0.532	0.287	0.058	0.663	0.037	0.463	0.119	0.15	0.524
0.096	0.042	0.083	0.276	0.108	0.295	0.073	0.18	0.114	0.145	0.042	0.624		0.095	0.023	0.066	0.26	0.091	0.279	0.055	0.163	0.097	0.129	0.024	0.621		0.096	0.061	0.1	0.292	0.124	0.31	0.089	0.195	0.13	0.16	0.058	0.625
-0.039	0.27	0.075	0.082	0.233	0.041	0.187	0.831	0.941	0.564	0.541	0.61		-0.041	0.25	0.056	0.064	0.214	0.022	0.169	0.814	0.925	0.547	0.523	0.609		-0.038	0.288	0.092	0.099	0.25	0.059	0.205	0.847	0.955	0.58	0.557	0.61
0.246	0.384	0.523	0.071	0.031	0.455	0.002	0.031	0.035	0.102	0.008	-0.033		0.245	0.372	0.51	0.057	0.017	0.442	-0.009	0.02	0.025	0.095	0.004	-0.035		0.246	0.394	0.535	0.083	0.044	0.466	0.01	0.041	0.045	0.108	0.012	-0.033
RepA1-120h	OD												RepA2-120h	OD												RepA3-120h	OD
0	0.384	0.009	0.963	0.012	0.064	0.39	0.099	0.48	0.196	0.538	0.55		0	0.385	0.009	0.962	0.008	0.063	0.389	0.094	0.478	0.196	0.538	0.55		0	0.384	0.009	0.965	0.018	0.067	0.393	0.105	0.484	0.196	0.538	0.55
0.007	0.131	0.416	0.053	0.663	-0.012	0.693	-0.045	0.514	0.466	0.307	0.433		0.008	0.121	0.404	0.041	0.653	-0.023	0.684	-0.054	0.504	0.455	0.296	0.433		0.007	0.14	0.427	0.065	0.673	-0.001	0.702	-0.037	0.525	0.477	0.317	0.433
0.038	0.014	0.379	0.16	0.674	0.036	0.051	0.409	0.041	0.556	0.301	0.416		0.039	0.002	0.366	0.147	0.664	0.024	0.039	0.398	0.029	0.545	0.289	0.416		0.038	0.025	0.391	0.172	0.683	0.046	0.062	0.419	0.051	0.565	0.312	0.416
0.634	0.501	0.077	0.033	0.038	0.518	0.172	0.67	0.505	0.085	0.011	0.587		0.634	0.487	0.063	0.019	0.025	0.507	0.16	0.659	0.491	0.071	-0.003	0.587		0.634	0.513	0.09	0.045	0.049	0.529	0.184	0.681	0.517	0.097	0.023	0.587
0.022	0.212	0.04	0.629	0.341	0.035	0.661	0.011	0.537	0.124	0.146	0.578		0.022	0.194	0.026	0.617	0.328	0.022	0.65	-0.003	0.523	0.111	0.132	0.577		0.022	0.227	0.053	0.64	0.353	0.047	0.673	0.023	0.548	0.137	0.158	0.578
0.18	0.032	0.077	0.43	0.098	0.402	0.081	0.195	0.146	0.459	0.039	0.615		0.18	0.013	0.063	0.416	0.084	0.39	0.067	0.181	0.131	0.445	0.024	0.614		0.18	0.045	0.09	0.442	0.111	0.414	0.093	0.207	0.158	0.472	0.05	0.615
-0.033	0.27	0.068	0.083	0.244	0.057	0.351	0.808	1.201	0.637	0.435	0.627		-0.033	0.253	0.053	0.069	0.229	0.042	0.337	0.794	1.187	0.622	0.421	0.626		-0.033	0.284	0.082	0.096	0.258	0.071	0.365	0.821	1.212	0.649	0.447	0.627
0.304	0.559	0.574	0.081	0.022	0.458	0.01	0.038	0.05	0.083	0.041	-0.008		0.304	0.558	0.57	0.072	0.014	0.454	0.007	0.033	0.047	0.084	0.041	-0.008		0.304	0.561	0.581	0.089	0.03	0.464	0.014	0.044	0.054	0.085	0.042	-0.008
RepA1-144h	OD												RepA2-144h	OD												RepA3-144h	OD
0	0.363	0.024	0.993	0.032	0.083	0.445	0.13	0.563	0.246	0.624	0.629		0	0.364	0.025	0.989	0.024	0.078	0.441	0.121	0.558	0.244	0.624	0.629		0	0.363	0.024	0.996	0.038	0.087	0.449	0.136	0.568	0.247	0.624	0.629
0.01	0.156	0.432	0.075	0.686	0	0.713	-0.03	0.582	0.563	0.357	0.511		0.011	0.145	0.419	0.061	0.674	-0.012	0.701	-0.04	0.57	0.55	0.345	0.512		0.009	0.165	0.442	0.086	0.696	0.011	0.721	-0.022	0.593	0.574	0.367	0.511
0.051	0.028	0.381	0.191	0.715	0.047	0.063	0.467	0.06	0.635	0.307	0.483		0.053	0.014	0.367	0.176	0.703	0.035	0.049	0.455	0.046	0.623	0.293	0.483		0.051	0.039	0.393	0.203	0.724	0.058	0.074	0.476	0.071	0.645	0.318	0.483
0.722	0.515	0.081	0.049	0.056	0.611	0.205	0.759	0.53	0.124	0.041	0.725		0.722	0.501	0.065	0.034	0.041	0.598	0.191	0.746	0.514	0.107	0.024	0.725		0.722	0.528	0.094	0.061	0.068	0.621	0.217	0.77	0.542	0.137	0.054	0.725
0.024	0.216	0.048	0.724	0.441	0.056	0.684	0.03	0.633	0.176	0.192	0.68		0.024	0.196	0.032	0.71	0.427	0.041	0.669	0.012	0.617	0.159	0.176	0.681		0.024	0.231	0.061	0.735	0.453	0.069	0.694	0.043	0.645	0.189	0.206	0.68
0.289	0.058	0.1	0.53	0.121	0.462	0.121	0.234	0.196	0.528	0.078	0.648		0.289	0.039	0.083	0.515	0.104	0.446	0.103	0.216	0.179	0.512	0.062	0.648		0.289	0.072	0.114	0.542	0.135	0.474	0.134	0.248	0.21	0.542	0.091	0.648
-0.02	0.301	0.093	0.11	0.269	0.137	0.446	0.817	1.268	0.76	0.424	0.62		-0.02	0.282	0.075	0.093	0.25	0.118	0.426	0.799	1.253	0.743	0.408	0.619		-0.02	0.315	0.107	0.124	0.284	0.152	0.46	0.831	1.279	0.773	0.436	0.62
0.373	0.638	0.63	0.122	0.053	0.44	0.039	0.067	0.073	0.107	0.062	0.025		0.373	0.634	0.619	0.11	0.039	0.43	0.031	0.056	0.065	0.106	0.062	0.026		0.373	0.643	0.637	0.131	0.062	0.446	0.044	0.073	0.079	0.111	0.063	0.025
RepA1-168h	OD												RepA2-168h	OD												RepA3-168h	OD
0	0.304	0.006	0.953	0	0.056	0.457	0.106	0.569	0.258	0.649	0.603		0	0.305	0.007	0.952	-0.004	0.055	0.456	0.1	0.567	0.259	0.648	0.603		0	0.303	0.005	0.953	0.002	0.056	0.458	0.11	0.571	0.257	0.648	0.602
-0.024	0.134	0.409	0.051	0.652	-0.035	0.673	-0.06	0.62	0.607	0.33	0.542		-0.023	0.127	0.398	0.037	0.64	-0.048	0.663	-0.07	0.608	0.595	0.32	0.542		-0.025	0.14	0.418	0.061	0.661	-0.026	0.681	-0.052	0.63	0.617	0.339	0.541
0.029	-0.008	0.333	0.177	0.692	0.011	0.026	0.478	0.029	0.607	0.259	0.498		0.03	-0.018	0.319	0.162	0.68	-0.002	0.013	0.466	0.016	0.596	0.246	0.498		0.028	0.001	0.344	0.188	0.701	0.021	0.036	0.486	0.038	0.616	0.269	0.496
0.755	0.469	0.037	0.019	0.025	0.661	0.192	0.804	0.51	0.11	0.015	0.75		0.755	0.455	0.021	0.004	0.01	0.649	0.178	0.791	0.495	0.095	0.001	0.75		0.754	0.481	0.049	0.031	0.036	0.671	0.203	0.814	0.522	0.122	0.027	0.749
-0.011	0.166	0.01	0.77	0.504	0.029	0.641	-0.012	0.654	0.165	0.174	0.701		-0.011	0.148	-0.007	0.757	0.49	0.014	0.628	-0.028	0.64	0.15	0.159	0.701		-0.012	0.179	0.022	0.78	0.515	0.04	0.653	0.001	0.666	0.177	0.186	0.7
0.481	0.035	0.071	0.483	0.087	0.458	0.1	0.205	0.179	0.527	0.048	0.627		0.481	0.018	0.055	0.468	0.07	0.444	0.084	0.189	0.163	0.512	0.035	0.627		0.48	0.048	0.084	0.494	0.099	0.469	0.113	0.218	0.192	0.539	0.059	0.625
-0.04	0.282	0.068	0.089	0.24	0.153	0.464	0.758	1.249	0.842	0.362	0.559		-0.04	0.266	0.051	0.073	0.223	0.136	0.447	0.742	1.235	0.827	0.349	0.559		-0.041	0.294	0.081	0.101	0.254	0.166	0.477	0.771	1.259	0.853	0.371	0.558
0.397	0.673	0.631	0.123	0.033	0.399	0.018	0.04	0.04	0.072	0.039	0.01		0.397	0.673	0.625	0.113	0.023	0.394	0.015	0.036	0.036	0.073	0.039	0.01		0.396	0.673	0.635	0.128	0.039	0.402	0.02	0.043	0.043	0.071	0.038	0.009
RepA1-192h	OD												RepA2-192h	OD												RepA3-192h	OD
0	0.29	0.04	0.954	0.031	0.092	0.527	0.147	0.62	0.337	0.708	0.031		0	0.29	0.04	0.954	0.028	0.091	0.526	0.142	0.618	0.337	0.708	0.031		0	0.29	0.04	0.954	0.033	0.092	0.528	0.151	0.622	0.336	0.708	0.031
-0.009	0.172	0.441	0.083	0.671	-0.013	0.691	-0.029	0.711	0.702	0.352	0.662		-0.009	0.17	0.431	0.071	0.661	-0.024	0.681	-0.039	0.7	0.69	0.345	0.662		-0.009	0.174	0.45	0.094	0.682	-0.002	0.701	-0.021	0.721	0.712	0.358	0.662
0.061	0.011	0.338	0.213	0.723	0.034	0.05	0.557	0.065	0.623	0.276	0.552		0.061	0.001	0.324	0.2	0.712	0.022	0.038	0.547	0.052	0.612	0.265	0.552		0.061	0.021	0.35	0.226	0.733	0.044	0.062	0.567	0.076	0.633	0.286	0.551
0.823	0.484	0.05	0.046	0.049	0.768	0.242	0.912	0.68	0.16	0.049	0.818		0.822	0.472	0.036	0.032	0.036	0.757	0.229	0.9	0.666	0.146	0.037	0.818		0.823	0.497	0.064	0.059	0.062	0.779	0.254	0.923	0.692	0.173	0.062	0.818
0.01	0.176	0.03	0.874	0.621	0.062	0.663	0.011	0.637	0.215	0.22	0.821		0.01	0.158	0.016	0.863	0.61	0.048	0.651	-0.003	0.624	0.201	0.206	0.82		0.01	0.19	0.043	0.886	0.634	0.075	0.676	0.025	0.65	0.228	0.232	0.82
0.717	0.067	0.099	0.483	0.113	0.51	0.14	0.24	0.227	0.602	0.081	0.688		0.717	0.05	0.085	0.469	0.098	0.496	0.125	0.225	0.212	0.588	0.069	0.688		0.717	0.081	0.113	0.496	0.128	0.523	0.154	0.254	0.241	0.615	0.092	0.688
-0.002	0.347	0.096	0.121	0.269	0.215	0.538	0.758	1.27	0.817	0.366	0.537		-0.002	0.332	0.08	0.107	0.253	0.2	0.522	0.743	1.257	0.803	0.356	0.536		-0.002	0.36	0.11	0.135	0.284	0.23	0.553	0.772	1.282	0.83	0.374	0.536
0.423	0.765	0.691	0.18	0.065	0.404	0.056	0.077	0.066	0.098	0.071	0.035		0.422	0.765	0.687	0.173	0.056	0.401	0.055	0.075	0.064	0.097	0.071	0.036		0.423	0.766	0.694	0.187	0.072	0.407	0.058	0.08	0.069	0.098	0.071	0.036

## Sheet: G11B
RepB1-0h	OD												RepB2-0h	OD												RepB3-0h	OD
0	0.001	-0.002	-0.002	-0.003	-0.009	-0.005	-0.007	-0.009	-0.011	0.004	-0.002		0	0.001	-0.001	-0.001	-0.003	-0.008	-0.004	-0.006	-0.009	-0.01	0.005	-0.001		0	0.001	-0.001	-0.002	-0.003	-0.009	-0.005	-0.006	-0.009	-0.01	0.004	-0.001
-0.023	0.01	0.123	-0.04	-0.04	-0.04	-0.047	-0.036	-0.038	-0.039	-0.026	-0.031		-0.022	0.011	0.124	-0.04	-0.039	-0.04	-0.046	-0.035	-0.037	-0.039	-0.025	-0.03		-0.023	0.011	0.124	-0.04	-0.039	-0.04	-0.046	-0.035	-0.037	-0.039	-0.025	-0.03
-0.028	-0.019	-0.031	-0.032	-0.026	-0.027	-0.027	-0.037	-0.035	-0.034	-0.025	-0.023		-0.028	-0.019	-0.03	-0.032	-0.025	-0.026	-0.026	-0.036	-0.034	-0.033	-0.024	-0.023		-0.028	-0.019	-0.031	-0.032	-0.025	-0.026	-0.026	-0.036	-0.034	-0.033	-0.024	-0.022
-0.032	-0.043	-0.035	-0.037	-0.029	-0.037	-0.051	-0.046	-0.041	-0.045	-0.044	-0.046		-0.031	-0.042	-0.035	-0.037	-0.028	-0.036	-0.05	-0.045	-0.041	-0.044	-0.043	-0.045		-0.032	-0.042	-0.035	-0.037	-0.028	-0.037	-0.05	-0.045	-0.041	-0.044	-0.043	-0.045
-0.021	-0.022	-0.025	-0.015	-0.025	-0.014	-0.035	-0.02	-0.011	-0.022	-0.01	-0.025		-0.021	-0.021	-0.024	-0.014	-0.024	-0.013	-0.034	-0.019	-0.01	-0.021	-0.008	-0.024		-0.021	-0.021	-0.024	-0.014	-0.024	-0.014	-0.034	-0.019	-0.01	-0.021	-0.009	-0.024
-0.043	-0.049	-0.035	-0.045	-0.048	-0.042	-0.035	-0.042	-0.04	-0.049	-0.04	-0.044		-0.042	-0.048	-0.034	-0.045	-0.047	-0.041	-0.034	-0.041	-0.039	-0.048	-0.04	-0.043		-0.042	-0.048	-0.034	-0.045	-0.047	-0.041	-0.034	-0.041	-0.039	-0.048	-0.039	-0.043
-0.047	0.563	-0.042	-0.044	-0.045	-0.042	-0.035	-0.034	-0.033	-0.044	-0.041	-0.043		-0.046	0.56	-0.042	-0.042	-0.044	-0.041	-0.034	-0.034	-0.032	-0.043	-0.04	-0.042		-0.046	0.557	-0.042	-0.043	-0.044	-0.042	-0.034	-0.034	-0.033	-0.043	-0.04	-0.041
-0.031	-0.036	0.143	-0.048	-0.034	-0.045	-0.047	-0.03	-0.032	1.364	-0.038	-0.039		-0.03	-0.035	0.142	-0.048	-0.034	-0.044	-0.046	-0.028	-0.031	1.359	-0.037	-0.037		-0.03	-0.035	0.14	-0.048	-0.034	-0.044	-0.046	-0.029	-0.031	1.357	-0.037	-0.037
RepB1-24h	OD												RepB2-24h	OD												RepB3-24h	OD
0	0.055	0.047	0.062	0.055	0.048	0.067	0.056	0.043	0.062	0.05	0.059		0	0.045	0.044	0.058	0.054	0.047	0.067	0.057	0.043	0.058	0.05	0.059		0	0.032	0.039	0.049	0.05	0.043	0.064	0.055	0.04	0.053	0.05	0.059
0.038	0.071	0.253	0.048	0.114	0.033	0.083	-0.014	0.094	0.076	0.007	0.071		0.03	0.075	0.255	0.051	0.117	0.037	0.086	-0.011	0.097	0.08	0.009	0.071		0.022	0.077	0.255	0.052	0.118	0.039	0.087	-0.01	0.098	0.082	0.009	0.071
0.014	0.053	0.076	0.072	0.13	0.071	0.064	0.066	0.043	0.04	0.103	0.057		0.006	0.056	0.079	0.076	0.134	0.075	0.068	0.069	0.047	0.043	0.106	0.057		0	0.058	0.081	0.077	0.136	0.076	0.07	0.071	0.049	0.046	0.107	0.057
0.02	0.13	0.063	0.056	0.064	0.086	0.05	0.087	0.07	0.068	0.03	-0.013		0.02	0.133	0.067	0.059	0.068	0.089	0.054	0.09	0.074	0.072	0.034	-0.013		0.021	0.134	0.068	0.061	0.069	0.091	0.056	0.092	0.076	0.075	0.035	-0.013
-0.047	0.127	0.079	0.12	0.069	0.081	0.137	0.02	0.157	0.068	0.07	0.049		-0.047	0.132	0.083	0.124	0.072	0.085	0.14	0.024	0.161	0.072	0.074	0.049		-0.047	0.133	0.085	0.126	0.074	0.087	0.142	0.026	0.163	0.075	0.076	0.049
-0.024	0.016	0.07	0.049	0.093	0.029	0.067	0.053	0.061	0.032	0.025	-0.013		-0.024	0.02	0.073	0.053	0.095	0.032	0.07	0.057	0.065	0.037	0.028	-0.013		-0.024	0.021	0.075	0.054	0.096	0.034	0.072	0.06	0.068	0.039	0.029	-0.013
-0.028	0.466	0.07	0.065	0.011	0.054	0.07	0.098	0.086	0.061	0.03	-0.006		-0.031	0.466	0.073	0.068	0.015	0.057	0.074	0.101	0.091	0.065	0.033	-0.006		-0.032	0.465	0.074	0.07	0.016	0.058	0.075	0.103	0.093	0.066	0.033	-0.006
0.019	0.012	0.19	-0.033	-0.045	-0.007	-0.036	-0.021	0	0.366	-0.015	-0.032		0.019	0.003	0.186	-0.039	-0.049	-0.009	-0.037	-0.024	-0.004	0.364	-0.015	-0.032		0.019	-0.003	0.171	-0.043	-0.049	-0.009	-0.037	-0.024	-0.007	0.362	-0.015	-0.033
RepB1-48h	OD												RepB2-48h	OD												RepB3-48h	OD
0	0.294	0.063	0.253	0.07	0.093	0.193	0.116	0.186	0.154	0.199	0.231		0	0.299	0.074	0.263	0.082	0.104	0.205	0.128	0.198	0.164	0.207	0.236		0	0.3	0.08	0.269	0.089	0.112	0.212	0.136	0.206	0.171	0.212	0.238
0.036	0.167	0.457	0.086	0.355	0.067	0.295	-0.013	0.312	0.207	0.102	0.314		0.042	0.182	0.47	0.1	0.368	0.082	0.309	-0.001	0.325	0.22	0.114	0.318		0.048	0.192	0.479	0.109	0.377	0.092	0.318	0.007	0.334	0.23	0.123	0.322
0.031	0.093	0.381	0.146	0.333	0.096	0.082	0.201	0.068	0.142	0.328	0.274		0.036	0.109	0.395	0.161	0.347	0.111	0.096	0.214	0.081	0.155	0.341	0.279		0.042	0.119	0.405	0.171	0.356	0.121	0.105	0.223	0.091	0.164	0.351	0.283
0.228	0.411	0.126	0.081	0.086	0.244	0.113	0.283	0.356	0.163	0.051	0.123		0.233	0.426	0.142	0.096	0.101	0.258	0.127	0.296	0.369	0.176	0.065	0.126		0.237	0.436	0.152	0.106	0.111	0.268	0.137	0.305	0.378	0.186	0.075	0.129
0.031	0.241	0.11	0.294	0.168	0.112	0.42	0.04	0.335	0.092	0.137	0.276		0.032	0.259	0.127	0.31	0.183	0.127	0.433	0.053	0.349	0.106	0.152	0.28		0.036	0.27	0.137	0.32	0.194	0.138	0.443	0.063	0.358	0.116	0.162	0.283
0.06	0.071	0.124	0.159	0.137	0.122	0.092	0.099	0.106	0.067	0.063	0.471		0.066	0.088	0.141	0.175	0.15	0.138	0.107	0.114	0.121	0.081	0.079	0.477		0.071	0.099	0.152	0.185	0.16	0.149	0.118	0.125	0.132	0.092	0.09	0.48
0.006	0.457	0.122	0.113	0.102	0.086	0.098	0.397	0.333	0.16	0.318	0.205		0.009	0.474	0.139	0.13	0.12	0.103	0.116	0.413	0.35	0.177	0.334	0.212		0.013	0.484	0.15	0.142	0.131	0.114	0.128	0.425	0.362	0.188	0.346	0.215
0.112	0.121	0.223	0.066	0.056	0.14	0.013	0.06	0.042	0.371	0.025	-0.048		0.11	0.135	0.24	0.081	0.07	0.152	0.023	0.072	0.054	0.38	0.035	-0.045		0.107	0.144	0.25	0.089	0.078	0.159	0.028	0.078	0.061	0.383	0.041	-0.042
RepB1-72h	OD												RepB2-72h	OD												RepB3-72h	OD
0	0.393	0.031	0.747	0.04	0.08	0.317	0.128	0.323	0.163	0.349	0.368		0	0.393	0.036	0.751	0.047	0.086	0.323	0.135	0.329	0.167	0.35	0.369		0	0.394	0.041	0.754	0.053	0.092	0.329	0.142	0.335	0.171	0.351	0.37
0.002	0.155	0.503	0.074	0.588	0.037	0.503	-0.01	0.492	0.312	0.257	0.425		0.002	0.164	0.512	0.082	0.596	0.046	0.512	-0.003	0.5	0.32	0.265	0.425		0.003	0.172	0.52	0.091	0.604	0.055	0.52	0.004	0.508	0.328	0.274	0.427
0.023	0.079	0.474	0.159	0.551	0.074	0.074	0.349	0.068	0.343	0.388	0.29		0.025	0.089	0.483	0.168	0.559	0.083	0.084	0.357	0.077	0.352	0.397	0.291		0.027	0.098	0.492	0.178	0.567	0.092	0.092	0.366	0.085	0.36	0.405	0.292
0.432	0.576	0.125	0.064	0.072	0.405	0.14	0.497	0.575	0.119	0.034	0.323		0.432	0.586	0.134	0.073	0.082	0.415	0.149	0.506	0.583	0.127	0.043	0.324		0.433	0.596	0.144	0.083	0.091	0.424	0.159	0.514	0.591	0.136	0.053	0.325
0.011	0.28	0.088	0.46	0.217	0.09	0.622	0.046	0.397	0.108	0.141	0.474		0.012	0.292	0.099	0.47	0.227	0.1	0.632	0.055	0.407	0.118	0.152	0.475		0.012	0.303	0.109	0.479	0.237	0.11	0.641	0.064	0.416	0.128	0.163	0.477
0.063	0.063	0.123	0.262	0.119	0.25	0.085	0.148	0.113	0.088	0.047	0.542		0.066	0.075	0.134	0.273	0.13	0.261	0.096	0.158	0.123	0.098	0.058	0.543		0.067	0.087	0.145	0.283	0.141	0.271	0.106	0.169	0.133	0.108	0.069	0.545
-0.038	0.453	0.106	0.107	0.248	0.059	0.166	0.868	0.678	0.586	0.535	0.567		-0.037	0.464	0.118	0.119	0.261	0.071	0.179	0.879	0.689	0.598	0.546	0.569		-0.036	0.475	0.129	0.13	0.273	0.082	0.19	0.89	0.7	0.609	0.558	0.57
0.279	0.267	0.464	0.046	0.034	0.38	-0.015	0.035	0.032	0.305	0.014	-0.035		0.279	0.273	0.471	0.053	0.041	0.386	-0.011	0.041	0.038	0.313	0.02	-0.034		0.28	0.276	0.476	0.058	0.046	0.39	-0.007	0.046	0.045	0.32	0.025	-0.033
RepB1-96h	OD												RepB2-96h	OD												RepB3-96h	OD
0	0.427	0.067	1.004	0.073	0.114	0.382	0.167	0.386	0.207	0.415	0.389		0	0.43	0.076	1.009	0.082	0.123	0.391	0.176	0.395	0.214	0.418	0.39		0	0.429	0.081	1.012	0.087	0.128	0.396	0.182	0.401	0.218	0.419	0.39
0.036	0.19	0.522	0.106	0.685	0.06	0.58	0.011	0.535	0.396	0.345	0.441		0.041	0.201	0.532	0.116	0.693	0.07	0.59	0.02	0.545	0.406	0.355	0.443		0.041	0.208	0.538	0.123	0.7	0.078	0.597	0.026	0.551	0.413	0.362	0.443
0.064	0.106	0.476	0.198	0.639	0.098	0.097	0.429	0.09	0.454	0.407	0.309		0.07	0.118	0.487	0.21	0.65	0.109	0.108	0.439	0.101	0.464	0.417	0.313		0.071	0.126	0.494	0.218	0.657	0.117	0.115	0.446	0.108	0.471	0.424	0.314
0.537	0.616	0.145	0.089	0.099	0.498	0.179	0.594	0.597	0.135	0.062	0.424		0.54	0.625	0.158	0.101	0.111	0.509	0.191	0.604	0.607	0.147	0.074	0.427		0.538	0.632	0.166	0.109	0.119	0.517	0.199	0.61	0.614	0.155	0.083	0.427
0.046	0.307	0.111	0.56	0.274	0.119	0.694	0.077	0.466	0.156	0.189	0.551		0.05	0.322	0.124	0.572	0.286	0.131	0.704	0.088	0.477	0.168	0.203	0.554		0.05	0.332	0.133	0.579	0.294	0.14	0.712	0.096	0.485	0.176	0.212	0.554
0.129	0.104	0.161	0.365	0.164	0.367	0.132	0.205	0.176	0.159	0.097	0.543		0.134	0.119	0.174	0.378	0.178	0.38	0.145	0.218	0.188	0.171	0.11	0.546		0.135	0.128	0.183	0.386	0.189	0.389	0.154	0.226	0.197	0.18	0.119	0.547
-0.002	0.506	0.148	0.151	0.334	0.102	0.258	0.909	1.059	0.68	0.634	0.584		0.002	0.52	0.163	0.166	0.349	0.116	0.272	0.922	1.071	0.693	0.647	0.588		0.001	0.528	0.172	0.176	0.359	0.127	0.283	0.93	1.08	0.702	0.656	0.589
0.318	0.441	0.587	0.093	0.076	0.548	0.027	0.088	0.086	0.324	0.075	-0.025		0.32	0.449	0.594	0.102	0.085	0.555	0.034	0.096	0.095	0.33	0.082	-0.023		0.32	0.452	0.597	0.107	0.089	0.558	0.036	0.1	0.1	0.333	0.086	-0.023
RepB1-120h	OD												RepB2-120h	OD												RepB3-120h	OD
0	0.37	0.047	0.981	0.047	0.095	0.425	0.161	0.422	0.215	0.457	0.442		0	0.369	0.053	0.984	0.054	0.101	0.43	0.168	0.427	0.218	0.458	0.443		0	0.367	0.057	0.986	0.06	0.105	0.435	0.173	0.431	0.219	0.458	0.443
0.002	0.182	0.479	0.093	0.713	0.033	0.596	0.002	0.554	0.485	0.389	0.421		0.001	0.194	0.49	0.104	0.722	0.044	0.606	0.011	0.563	0.495	0.399	0.422		0	0.201	0.497	0.112	0.729	0.052	0.614	0.017	0.57	0.503	0.406	0.422
0.041	0.078	0.421	0.2	0.709	0.071	0.076	0.491	0.069	0.588	0.363	0.257		0.042	0.091	0.432	0.213	0.719	0.083	0.088	0.5	0.079	0.598	0.374	0.258		0.041	0.1	0.441	0.222	0.727	0.091	0.096	0.508	0.087	0.605	0.382	0.258
0.608	0.569	0.113	0.068	0.078	0.588	0.18	0.686	0.574	0.116	0.046	0.557		0.608	0.58	0.125	0.08	0.09	0.599	0.191	0.696	0.584	0.127	0.057	0.557		0.608	0.589	0.135	0.09	0.099	0.607	0.2	0.703	0.591	0.136	0.066	0.558
0.012	0.259	0.079	0.656	0.31	0.098	0.679	0.052	0.507	0.165	0.188	0.539		0.012	0.273	0.092	0.668	0.322	0.11	0.69	0.064	0.518	0.177	0.201	0.54		0.011	0.284	0.102	0.677	0.331	0.12	0.698	0.073	0.527	0.187	0.211	0.541
0.144	0.076	0.14	0.523	0.135	0.487	0.126	0.197	0.19	0.459	0.082	0.46		0.145	0.091	0.153	0.535	0.15	0.5	0.139	0.21	0.204	0.471	0.095	0.461		0.144	0.101	0.164	0.545	0.162	0.509	0.149	0.221	0.213	0.481	0.105	0.462
-0.035	0.44	0.125	0.132	0.3	0.095	0.372	0.881	1.306	0.738	0.509	0.529		-0.036	0.454	0.139	0.147	0.315	0.11	0.386	0.894	1.318	0.751	0.522	0.529		-0.037	0.464	0.15	0.158	0.327	0.121	0.397	0.904	1.326	0.761	0.531	0.529
0.371	0.586	0.59	0.069	0.039	0.474	0.013	0.061	0.075	0.263	0.08	0.001		0.371	0.591	0.596	0.076	0.045	0.478	0.016	0.066	0.082	0.27	0.083	0.001		0.372	0.591	0.597	0.078	0.047	0.478	0.016	0.068	0.085	0.272	0.083	0.001
RepB1-144h	OD												RepB2-144h	OD												RepB3-144h	OD
0	0.36	0.074	1.009	0.067	0.117	0.484	0.195	0.499	0.27	0.504	0.501		0	0.359	0.079	1.011	0.074	0.123	0.49	0.202	0.505	0.274	0.505	0.502		0	0.355	0.081	1.011	0.078	0.125	0.493	0.206	0.509	0.276	0.503	0.501
0.012	0.205	0.485	0.113	0.734	0.043	0.612	0.016	0.629	0.582	0.435	0.435		0.011	0.214	0.493	0.122	0.743	0.053	0.622	0.024	0.637	0.591	0.444	0.436		0.008	0.22	0.499	0.128	0.747	0.059	0.628	0.029	0.643	0.598	0.45	0.435
0.059	0.087	0.422	0.23	0.75	0.081	0.086	0.559	0.087	0.669	0.368	0.275		0.059	0.098	0.431	0.24	0.759	0.091	0.096	0.568	0.097	0.677	0.378	0.275		0.057	0.105	0.438	0.247	0.765	0.098	0.102	0.573	0.103	0.683	0.384	0.273
0.693	0.575	0.114	0.085	0.089	0.676	0.209	0.779	0.595	0.153	0.073	0.669		0.69	0.584	0.125	0.096	0.099	0.686	0.219	0.788	0.603	0.164	0.083	0.668		0.687	0.591	0.133	0.103	0.106	0.692	0.226	0.794	0.61	0.171	0.091	0.666
0.018	0.259	0.084	0.751	0.401	0.119	0.698	0.065	0.579	0.211	0.226	0.551		0.018	0.272	0.096	0.761	0.411	0.13	0.708	0.076	0.589	0.222	0.237	0.551		0.015	0.282	0.104	0.768	0.418	0.138	0.714	0.084	0.596	0.23	0.246	0.55
0.22	0.103	0.161	0.572	0.159	0.548	0.162	0.229	0.234	0.527	0.116	0.432		0.219	0.115	0.173	0.583	0.172	0.559	0.174	0.24	0.245	0.538	0.128	0.433		0.216	0.124	0.181	0.59	0.181	0.567	0.182	0.248	0.253	0.546	0.136	0.432
-0.02	0.387	0.147	0.159	0.32	0.164	0.493	0.901	1.345	0.865	0.492	0.509		-0.022	0.398	0.16	0.172	0.334	0.178	0.506	0.912	1.355	0.875	0.503	0.509		-0.027	0.406	0.168	0.181	0.343	0.186	0.514	0.919	1.361	0.883	0.511	0.508
0.418	0.663	0.623	0.096	0.06	0.46	0.039	0.082	0.102	0.258	0.109	0.029		0.418	0.666	0.627	0.103	0.067	0.464	0.043	0.087	0.109	0.264	0.113	0.03		0.417	0.666	0.627	0.105	0.068	0.464	0.043	0.088	0.111	0.266	0.113	0.029
RepB1-168h	OD												RepB2-168h	OD												RepB3-168h	OD
0	0.319	0.074	0.999	0.063	0.111	0.52	0.199	0.521	0.303	0.513	0.364		0	0.314	0.077	1	0.068	0.114	0.524	0.205	0.525	0.304	0.513	0.364		0	0.314	0.078	0.999	0.071	0.115	0.526	0.209	0.527	0.304	0.514	0.362
0	0.216	0.483	0.115	0.728	0.035	0.603	0.013	0.701	0.656	0.442	0.503		-0.005	0.225	0.491	0.124	0.735	0.044	0.612	0.02	0.709	0.665	0.451	0.503		-0.005	0.231	0.498	0.131	0.742	0.052	0.619	0.026	0.715	0.672	0.456	0.503
0.056	0.08	0.405	0.246	0.761	0.074	0.077	0.616	0.087	0.67	0.351	0.3		0.053	0.091	0.415	0.257	0.77	0.083	0.087	0.623	0.097	0.679	0.36	0.299		0.049	0.099	0.423	0.265	0.776	0.091	0.094	0.63	0.104	0.686	0.368	0.299
0.759	0.56	0.1	0.088	0.085	0.755	0.225	0.859	0.616	0.174	0.078	0.707		0.758	0.569	0.111	0.098	0.095	0.764	0.235	0.867	0.625	0.184	0.088	0.707		0.757	0.576	0.119	0.107	0.104	0.772	0.243	0.874	0.631	0.193	0.096	0.707
0.006	0.243	0.078	0.832	0.507	0.127	0.691	0.057	0.603	0.235	0.238	0.529		0.004	0.256	0.09	0.842	0.516	0.138	0.7	0.068	0.613	0.246	0.248	0.53		0.003	0.266	0.099	0.849	0.523	0.147	0.707	0.077	0.621	0.255	0.257	0.53
0.31	0.114	0.17	0.543	0.162	0.586	0.179	0.235	0.251	0.562	0.121	0.408		0.307	0.127	0.182	0.553	0.175	0.597	0.19	0.246	0.262	0.573	0.133	0.407		0.303	0.136	0.191	0.562	0.186	0.606	0.199	0.255	0.271	0.581	0.141	0.406
-0.018	0.374	0.155	0.17	0.329	0.207	0.55	0.887	1.362	0.97	0.46	0.491		-0.022	0.385	0.167	0.183	0.342	0.22	0.562	0.897	1.37	0.98	0.47	0.49		-0.023	0.393	0.176	0.193	0.353	0.229	0.572	0.905	1.377	0.988	0.477	0.49
0.451	0.736	0.65	0.121	0.079	0.45	0.048	0.084	0.101	0.222	0.113	0.075		0.451	0.736	0.651	0.126	0.083	0.451	0.05	0.086	0.106	0.224	0.113	0.074		0.451	0.733	0.65	0.128	0.084	0.45	0.049	0.085	0.108	0.223	0.111	0.074
RepB1-192h	OD												RepB2-192h	OD												RepB3-192h	OD
0	0.311	0.094	0.977	0.082	0.132	0.575	0.226	0.553	0.363	0.527	-0.081		0	0.306	0.097	0.977	0.086	0.134	0.578	0.231	0.557	0.364	0.527	-0.081		0	0.303	0.097	0.976	0.09	0.135	0.582	0.238	0.562	0.363	0.528	-0.082
0.01	0.248	0.507	0.135	0.731	0.043	0.609	0.025	0.779	0.731	0.448	0.615		0.005	0.255	0.513	0.142	0.738	0.051	0.616	0.032	0.786	0.738	0.454	0.615		0.001	0.264	0.524	0.154	0.748	0.064	0.628	0.042	0.797	0.75	0.462	0.616
0.073	0.091	0.403	0.274	0.782	0.081	0.086	0.696	0.106	0.667	0.352	0.332		0.071	0.099	0.411	0.282	0.789	0.09	0.094	0.702	0.114	0.674	0.359	0.333		0.061	0.112	0.424	0.296	0.8	0.103	0.107	0.714	0.127	0.686	0.371	0.333
0.807	0.563	0.103	0.101	0.098	0.847	0.259	0.954	0.79	0.209	0.095	0.758		0.807	0.571	0.112	0.11	0.107	0.855	0.267	0.961	0.797	0.217	0.103	0.758		0.807	0.581	0.126	0.125	0.121	0.868	0.281	0.973	0.809	0.232	0.116	0.759
0.011	0.243	0.085	0.922	0.601	0.144	0.694	0.064	0.6	0.267	0.269	0.564		0.008	0.254	0.095	0.93	0.609	0.153	0.701	0.074	0.608	0.276	0.278	0.564		0.008	0.27	0.11	0.942	0.621	0.169	0.715	0.089	0.622	0.291	0.292	0.565
0.496	0.137	0.19	0.527	0.172	0.624	0.203	0.25	0.277	0.613	0.135	0.383		0.493	0.146	0.2	0.536	0.183	0.633	0.212	0.259	0.286	0.622	0.143	0.383		0.49	0.161	0.215	0.55	0.201	0.648	0.228	0.275	0.302	0.637	0.157	0.383
-0.001	0.43	0.17	0.19	0.344	0.247	0.604	0.871	1.362	0.909	0.445	0.483		-0.004	0.438	0.18	0.2	0.354	0.257	0.613	0.878	1.369	0.917	0.451	0.483		-0.004	0.448	0.195	0.217	0.371	0.273	0.63	0.894	1.381	0.931	0.462	0.482
0.442	0.797	0.682	0.155	0.104	0.447	0.075	0.102	0.109	0.201	0.132	0.082		0.442	0.795	0.682	0.156	0.106	0.446	0.074	0.101	0.112	0.201	0.129	0.081		0.442	0.784	0.673	0.154	0.104	0.441	0.068	0.097	0.112	0.197	0.12	0.081

## Sheet: G14A
RepA1-0h	OD												RepA2-0h	OD												RepA3-0h	OD
0	0.05	0.004	-0.001	0.004	0.011	0.017	0.004	0.021	0.01	0.028	0.005		0	0.049	0.003	-0.002	0.003	0.01	0.016	0.003	0.02	0.008	0.026	0.004		0	0.05	0.003	-0.002	0.003	0.009	0.016	0.003	0.02	0.008	0.027	0.007
0.002	0.056	0.067	-0.013	-0.033	-0.03	-0.035	-0.011	-0.027	-0.026	0.003	-0.021		0.001	0.055	0.066	-0.014	-0.034	-0.031	-0.036	-0.012	-0.028	-0.027	0.002	-0.022		0.001	0.054	0.066	-0.014	-0.034	-0.031	-0.036	-0.012	-0.029	-0.026	0.002	-0.022
-0.013	-0.005	-0.018	-0.013	0	-0.015	-0.013	-0.025	-0.021	-0.007	-0.022	-0.015		-0.015	-0.006	-0.019	-0.014	-0.001	-0.015	-0.014	-0.025	-0.022	-0.008	-0.023	-0.016		-0.015	-0.006	-0.02	-0.014	-0.001	-0.015	-0.014	-0.025	-0.022	-0.008	-0.023	-0.016
-0.014	-0.027	-0.029	-0.029	-0.001	-0.021	-0.035	-0.03	-0.023	-0.032	-0.018	-0.033		-0.014	-0.029	-0.03	-0.03	-0.002	-0.022	-0.036	-0.032	-0.023	-0.033	-0.019	-0.033		-0.014	-0.029	-0.03	-0.03	-0.002	-0.022	-0.036	-0.032	-0.023	-0.033	-0.018	-0.034
-0.001	0.038	-0.015	-0.003	-0.003	0.011	-0.02	-0.015	-0.014	-0.023	-0.007	-0.023		-0.002	0.038	-0.017	-0.004	-0.003	0.01	-0.021	-0.017	-0.015	-0.024	-0.008	-0.024		-0.003	0.037	-0.017	-0.004	-0.004	0.01	-0.021	-0.016	-0.015	-0.025	-0.008	-0.024
-0.035	-0.035	-0.033	-0.037	-0.035	-0.032	-0.024	-0.028	-0.028	-0.028	-0.027	-0.027		-0.036	-0.035	-0.034	-0.037	-0.035	-0.033	-0.024	-0.029	-0.029	-0.028	-0.028	-0.027		-0.036	-0.035	-0.035	-0.037	-0.035	-0.033	-0.024	-0.03	-0.028	-0.028	-0.028	-0.028
-0.036	0.403	-0.023	-0.042	-0.042	-0.027	-0.038	-0.032	-0.036	-0.039	-0.019	-0.021		-0.036	0.402	-0.024	-0.043	-0.042	-0.028	-0.039	-0.033	-0.037	-0.04	-0.019	-0.022		-0.037	0.401	-0.024	-0.043	-0.042	-0.028	-0.039	-0.033	-0.037	-0.04	-0.02	-0.022
-0.027	-0.015	0.875	-0.024	-0.017	-0.036	-0.039	-0.026	-0.012	1.317	-0.039	-0.039		-0.028	-0.016	0.876	-0.025	-0.017	-0.037	-0.04	-0.027	-0.013	1.315	-0.04	-0.04		-0.028	-0.016	0.875	-0.026	-0.017	-0.037	-0.04	-0.027	-0.012	1.312	-0.041	-0.04
RepA1-24h	OD												RepA2-24h	OD												RepA3-24h	OD
0	0.019	0.001	-0.004	-0.013	-0.01	0.009	-0.01	-0.005	0.045	-0.005	-0.012		0	0.02	0.001	-0.004	-0.012	-0.01	0.009	-0.009	-0.004	0.045	-0.005	-0.012		0	0.02	0.001	-0.004	-0.012	-0.01	0.009	-0.01	-0.004	0.045	-0.004	-0.012
0.013	0.027	0.121	-0.01	0.002	-0.027	-0.018	0.109	-0.024	-0.019	0.011	0.009		0.013	0.041	0.137	0.007	0.019	-0.01	-0.002	0.127	-0.004	-0.001	0.02	0.009		0.013	0.042	0.139	0.009	0.022	-0.006	0.001	0.131	-0.001	0.002	0.017	0.009
-0.015	-0.021	0.007	-0.012	0.037	0.015	0.008	0.019	-0.005	0.011	-0.016	-0.018		-0.015	-0.008	0.025	0.006	0.057	0.033	0.026	0.036	0.013	0.03	0.001	-0.017		-0.015	-0.006	0.029	0.009	0.061	0.037	0.03	0.039	0.017	0.033	0.003	-0.017
-0.014	0.024	-0.017	-0.006	0.001	0.014	-0.019	-0.014	-0.013	-0.02	-0.024	-0.046		-0.013	0.039	0	0.011	0.02	0.034	-0.001	0.006	0.006	0	-0.012	-0.046		-0.013	0.043	0.004	0.015	0.024	0.038	0.004	0.011	0.01	0.004	-0.011	-0.046
-0.013	-0.006	-0.012	0.037	-0.014	0.002	0.068	0.002	0.028	-0.006	0.004	-0.029		-0.012	0.009	0.007	0.053	0.005	0.02	0.087	0.02	0.046	0.013	0.02	-0.029		-0.012	0.011	0.011	0.056	0.008	0.024	0.091	0.023	0.05	0.016	0.021	-0.029
-0.045	-0.038	-0.033	-0.042	-0.003	-0.039	-0.022	-0.015	-0.004	-0.032	-0.037	-0.046		-0.045	-0.026	-0.015	-0.027	0.013	-0.022	-0.006	0.002	0.014	-0.015	-0.025	-0.046		-0.044	-0.025	-0.012	-0.023	0.016	-0.019	-0.002	0.006	0.018	-0.012	-0.024	-0.046
-0.033	0.295	-0.012	-0.036	-0.069	-0.012	-0.01	-0.019	-0.03	-0.036	-0.033	-0.04		-0.032	0.303	0.004	-0.021	-0.053	0.004	0.006	-0.004	-0.017	-0.022	-0.026	-0.04		-0.032	0.302	0.007	-0.018	-0.05	0.007	0.009	-0.001	-0.014	-0.019	-0.025	-0.04
-0.036	-0.027	-0.037	-0.035	-0.023	-0.042	-0.036	-0.04	-0.029	0.333	-0.042	-0.068		-0.036	-0.027	-0.037	-0.035	-0.023	-0.042	-0.035	-0.04	-0.029	0.333	-0.042	-0.069		-0.036	-0.027	-0.037	-0.035	-0.023	-0.041	-0.035	-0.04	-0.029	0.331	-0.042	-0.069
RepA1-48h	OD												RepA2-48h	OD												RepA3-48h	OD
0	0.22	0.008	0.14	0.029	0.052	0.113	0.052	0.116	0.095	0.112	0.21		0	0.219	0.02	0.153	0.043	0.066	0.126	0.071	0.13	0.107	0.12	0.21		0	0.22	0.029	0.164	0.055	0.078	0.137	0.083	0.141	0.115	0.126	0.211
0.028	0.108	0.348	0.027	0.191	0.031	0.185	0.136	0.209	0.146	0.056	0.263		0.03	0.122	0.362	0.043	0.205	0.047	0.201	0.148	0.225	0.164	0.072	0.265		0.032	0.136	0.376	0.056	0.218	0.061	0.214	0.159	0.239	0.179	0.085	0.266
-0.002	0.029	0.183	0.099	0.246	0.046	0.035	0.083	0.038	0.112	0.19	0.204		0.002	0.042	0.198	0.113	0.26	0.062	0.05	0.097	0.053	0.127	0.207	0.208		0.006	0.054	0.211	0.127	0.274	0.075	0.064	0.11	0.065	0.141	0.222	0.21
0.166	0.306	0.058	0.026	0.049	0.129	0.046	0.194	0.225	0.137	0.031	0.043		0.171	0.319	0.072	0.041	0.064	0.145	0.061	0.209	0.239	0.152	0.049	0.045		0.174	0.332	0.085	0.054	0.077	0.159	0.073	0.223	0.251	0.164	0.064	0.046
0.009	0.15	0.046	0.216	0.093	0.058	0.33	0.037	0.245	0.051	0.064	0.183		0.012	0.166	0.063	0.229	0.107	0.074	0.345	0.049	0.259	0.067	0.082	0.184		0.016	0.179	0.077	0.241	0.12	0.087	0.357	0.059	0.271	0.08	0.098	0.184
0.017	0.002	0.031	0.079	0.123	0.046	0.037	0.053	0.052	0.033	0.025	0.221		0.024	0.016	0.046	0.092	0.135	0.059	0.051	0.068	0.066	0.048	0.043	0.223		0.029	0.029	0.059	0.104	0.146	0.07	0.064	0.081	0.079	0.061	0.059	0.224
-0.032	0.232	0.035	0.038	-0.03	0.016	0.031	0.231	0.116	0.08	0.114	0.086		-0.026	0.247	0.051	0.055	-0.017	0.031	0.047	0.247	0.131	0.095	0.13	0.088		-0.022	0.258	0.065	0.07	-0.004	0.045	0.062	0.262	0.146	0.109	0.144	0.089
0.016	0.035	0.032	0.043	0.009	0.055	-0.01	0.006	0.004	0.252	-0.018	-0.052		0.017	0.045	0.044	0.055	0.021	0.065	-0.001	0.016	0.015	0.269	-0.009	-0.052		0.017	0.055	0.056	0.067	0.032	0.075	0.008	0.024	0.025	0.283	-0.001	-0.052
RepA1-72h	OD												RepA2-72h	OD												RepA3-72h	OD
0	0.346	-0.001	0.544	0.015	0.049	0.244	0.04	0.277	0.11	0.251	0.404		0	0.346	0.011	0.562	0.036	0.069	0.259	0.07	0.293	0.122	0.253	0.404		0	0.347	0.021	0.573	0.049	0.082	0.27	0.083	0.303	0.129	0.255	0.404
0.017	0.083	0.459	0.012	0.406	0.008	0.421	0.111	0.44	0.238	0.178	0.506		0.018	0.103	0.48	0.034	0.426	0.029	0.441	0.127	0.46	0.26	0.2	0.506		0.018	0.117	0.494	0.048	0.439	0.044	0.455	0.138	0.475	0.276	0.216	0.506
0.008	0.017	0.577	0.118	0.454	0.032	0.02	0.139	0.026	0.275	0.38	0.373		0.009	0.039	0.596	0.139	0.474	0.052	0.04	0.159	0.045	0.295	0.402	0.373		0.013	0.054	0.609	0.153	0.487	0.066	0.054	0.172	0.059	0.308	0.417	0.374
0.37	0.584	0.061	0.006	0.031	0.235	0.05	0.437	0.511	0.123	0.011	0.199		0.372	0.603	0.08	0.026	0.052	0.257	0.07	0.457	0.528	0.144	0.034	0.2		0.376	0.616	0.094	0.041	0.067	0.272	0.084	0.471	0.542	0.158	0.05	0.201
0.017	0.234	0.025	0.396	0.166	0.042	0.554	0.026	0.366	0.061	0.056	0.462		0.02	0.257	0.047	0.415	0.187	0.062	0.573	0.042	0.385	0.081	0.08	0.463		0.025	0.271	0.063	0.429	0.201	0.077	0.586	0.053	0.398	0.095	0.098	0.463
0.045	0.007	0.051	0.161	0.122	0.128	0.031	0.049	0.054	0.037	0.023	0.789		0.048	0.029	0.071	0.181	0.14	0.147	0.051	0.069	0.074	0.057	0.047	0.792		0.053	0.045	0.086	0.194	0.152	0.16	0.065	0.084	0.088	0.071	0.064	0.794
-0.036	0.251	0.033	0.039	0.079	0.007	0.04	0.898	0.382	0.265	0.526	0.463		-0.033	0.274	0.055	0.062	0.1	0.028	0.061	0.918	0.402	0.285	0.545	0.464		-0.029	0.29	0.07	0.078	0.114	0.043	0.076	0.931	0.416	0.299	0.559	0.466
0.082	0.102	0.135	0.053	0.008	0.348	-0.021	0.003	-0.009	0.196	-0.027	-0.054		0.083	0.115	0.153	0.07	0.027	0.363	-0.009	0.015	0.003	0.224	-0.019	-0.053		0.083	0.124	0.165	0.082	0.039	0.373	-0.001	0.024	0.013	0.242	-0.012	-0.053
RepA1-96h	OD												RepA2-96h	OD												RepA3-96h	OD
0	0.338	0.01	0.794	0.029	0.063	0.301	0.059	0.357	0.112	0.315	0.436		0	0.338	0.027	0.81	0.051	0.084	0.319	0.084	0.375	0.126	0.32	0.437		0	0.339	0.035	0.818	0.063	0.096	0.329	0.096	0.386	0.134	0.324	0.438
0.017	0.098	0.472	0.029	0.484	0.018	0.488	0.099	0.479	0.279	0.233	0.513		0.02	0.12	0.495	0.053	0.506	0.042	0.51	0.118	0.503	0.305	0.26	0.514		0.022	0.133	0.508	0.066	0.518	0.056	0.522	0.129	0.516	0.32	0.275	0.514
0.013	0.036	0.592	0.139	0.54	0.04	0.027	0.183	0.029	0.357	0.374	0.351		0.02	0.06	0.613	0.162	0.562	0.063	0.05	0.205	0.051	0.379	0.398	0.352		0.025	0.074	0.625	0.176	0.574	0.076	0.063	0.217	0.064	0.392	0.412	0.354
0.442	0.653	0.077	0.02	0.044	0.303	0.065	0.518	0.514	0.131	0.014	0.266		0.45	0.673	0.099	0.043	0.067	0.326	0.087	0.54	0.533	0.154	0.04	0.267		0.455	0.685	0.112	0.057	0.081	0.339	0.099	0.552	0.545	0.167	0.054	0.269
0.016	0.261	0.039	0.473	0.2	0.049	0.621	0.023	0.371	0.073	0.061	0.536		0.026	0.285	0.063	0.494	0.223	0.072	0.641	0.042	0.392	0.096	0.088	0.537		0.032	0.298	0.077	0.506	0.236	0.085	0.653	0.052	0.405	0.11	0.103	0.538
0.054	0.031	0.073	0.21	0.132	0.192	0.041	0.064	0.058	0.05	0.026	0.797		0.063	0.055	0.096	0.232	0.154	0.213	0.063	0.087	0.08	0.073	0.052	0.8		0.069	0.068	0.108	0.244	0.166	0.226	0.075	0.1	0.092	0.086	0.066	0.802
-0.037	0.284	0.05	0.058	0.157	0.017	0.087	1.045	0.476	0.437	0.593	0.58		-0.029	0.309	0.074	0.082	0.182	0.04	0.11	1.066	0.497	0.458	0.614	0.581		-0.025	0.322	0.088	0.096	0.196	0.053	0.124	1.078	0.51	0.471	0.627	0.583
0.119	0.143	0.203	0.07	0.02	0.46	-0.016	0.007	0.004	0.228	-0.026	-0.056		0.119	0.16	0.223	0.089	0.04	0.477	-0.004	0.021	0.018	0.257	-0.017	-0.055		0.12	0.169	0.234	0.1	0.052	0.486	0.005	0.03	0.028	0.273	-0.009	-0.054
RepA1-120h	OD												RepA2-120h	OD												RepA3-120h	OD
0	0.308	0.007	1.057	0.018	0.055	0.356	0.047	0.44	0.12	0.462	0.464		0	0.308	0.014	1.064	0.03	0.066	0.365	0.067	0.45	0.125	0.464	0.465		0	0.308	0.02	1.069	0.04	0.075	0.372	0.077	0.457	0.128	0.463	0.465
0.013	0.093	0.44	0.022	0.571	0.005	0.575	0.068	0.519	0.343	0.317	0.508		0.013	0.106	0.455	0.038	0.585	0.021	0.589	0.081	0.533	0.359	0.332	0.509		0.013	0.118	0.468	0.05	0.596	0.033	0.6	0.091	0.545	0.373	0.345	0.509
0.021	0.024	0.577	0.146	0.638	0.034	0.021	0.256	0.029	0.512	0.349	0.342		0.022	0.038	0.59	0.162	0.652	0.048	0.036	0.269	0.044	0.526	0.364	0.343		0.022	0.051	0.601	0.174	0.663	0.061	0.048	0.281	0.055	0.537	0.377	0.343
0.538	0.664	0.068	0.012	0.037	0.407	0.069	0.622	0.503	0.135	0.005	0.399		0.539	0.676	0.082	0.027	0.053	0.421	0.083	0.636	0.516	0.15	0.02	0.4		0.539	0.688	0.095	0.039	0.065	0.433	0.095	0.648	0.527	0.162	0.033	0.4
0.012	0.241	0.03	0.576	0.233	0.044	0.694	-0.003	0.405	0.101	0.057	0.639		0.013	0.256	0.046	0.589	0.248	0.059	0.707	0.009	0.418	0.116	0.073	0.64		0.014	0.269	0.059	0.6	0.26	0.071	0.718	0.02	0.43	0.128	0.087	0.64
0.069	0.032	0.076	0.3	0.129	0.332	0.045	0.087	0.079	0.079	0.029	0.786		0.069	0.046	0.09	0.314	0.144	0.346	0.059	0.102	0.094	0.094	0.044	0.787		0.07	0.059	0.102	0.325	0.156	0.357	0.071	0.114	0.106	0.106	0.057	0.787
-0.041	0.293	0.047	0.06	0.27	0.013	0.168	1.155	0.681	0.658	0.678	0.661		-0.04	0.308	0.063	0.076	0.286	0.028	0.183	1.169	0.695	0.672	0.69	0.662		-0.04	0.32	0.076	0.089	0.298	0.04	0.195	1.18	0.706	0.683	0.701	0.663
0.218	0.215	0.305	0.072	0.009	0.581	-0.018	0.006	0.037	0.186	0.015	-0.047		0.219	0.222	0.315	0.082	0.021	0.589	-0.012	0.014	0.044	0.201	0.016	-0.046		0.219	0.226	0.323	0.09	0.029	0.594	-0.008	0.019	0.05	0.214	0.018	-0.046
RepA1-144h	OD												RepA2-144h	OD												RepA3-144h	OD
0	0.293	0.028	1.041	0.035	0.072	0.399	0.071	0.508	0.147	0.549	0.429		0	0.293	0.035	1.048	0.046	0.082	0.408	0.085	0.517	0.152	0.549	0.429		0	0.293	0.039	1.053	0.055	0.091	0.415	0.095	0.525	0.156	0.549	0.429
0.014	0.118	0.445	0.043	0.628	0.018	0.625	0.068	0.57	0.415	0.379	0.513		0.013	0.131	0.459	0.057	0.64	0.033	0.639	0.081	0.586	0.432	0.395	0.513		0.013	0.142	0.47	0.068	0.651	0.045	0.651	0.091	0.599	0.447	0.408	0.512
0.033	0.036	0.576	0.173	0.706	0.044	0.034	0.323	0.045	0.608	0.347	0.366		0.034	0.051	0.589	0.188	0.718	0.058	0.049	0.338	0.06	0.623	0.363	0.366		0.035	0.064	0.6	0.2	0.729	0.07	0.062	0.35	0.072	0.635	0.376	0.365
0.593	0.671	0.079	0.03	0.053	0.499	0.085	0.706	0.512	0.16	0.013	0.496		0.594	0.684	0.093	0.044	0.067	0.513	0.1	0.721	0.526	0.176	0.03	0.496		0.595	0.696	0.104	0.056	0.079	0.525	0.113	0.734	0.539	0.19	0.043	0.496
0.013	0.239	0.044	0.656	0.278	0.063	0.723	0.006	0.476	0.147	0.074	0.654		0.015	0.255	0.059	0.669	0.292	0.077	0.737	0.021	0.492	0.164	0.092	0.654		0.016	0.268	0.072	0.679	0.304	0.09	0.748	0.035	0.506	0.178	0.107	0.654
0.091	0.054	0.098	0.427	0.147	0.411	0.071	0.126	0.127	0.211	0.047	0.775		0.093	0.069	0.112	0.441	0.162	0.425	0.088	0.145	0.145	0.228	0.064	0.775		0.095	0.082	0.124	0.452	0.174	0.438	0.103	0.161	0.161	0.243	0.078	0.776
-0.036	0.316	0.064	0.079	0.308	0.038	0.262	1.188	0.769	0.74	0.614	0.62		-0.035	0.331	0.081	0.096	0.326	0.058	0.283	1.203	0.785	0.757	0.629	0.62		-0.035	0.345	0.095	0.11	0.341	0.074	0.298	1.216	0.799	0.771	0.641	0.619
0.306	0.313	0.392	0.094	0.021	0.536	-0.002	0.025	0.076	0.192	0.052	-0.017		0.305	0.319	0.402	0.104	0.032	0.545	0.005	0.033	0.084	0.21	0.054	-0.017		0.305	0.325	0.41	0.112	0.041	0.551	0.01	0.039	0.091	0.225	0.058	-0.017
RepA1-168h	OD												RepA2-168h	OD												RepA3-168h	OD
0	0.277	0.028	0.997	0.031	0.066	0.419	0.061	0.578	0.168	0.628	0.202		0	0.278	0.032	1.003	0.041	0.075	0.427	0.077	0.585	0.17	0.629	0.203		0	0.278	0.034	1.007	0.049	0.082	0.433	0.088	0.59	0.17	0.629	0.204
0.015	0.125	0.436	0.037	0.64	0.01	0.643	0.052	0.644	0.484	0.402	0.507		0.016	0.138	0.45	0.051	0.653	0.024	0.657	0.064	0.658	0.499	0.413	0.509		0.016	0.149	0.461	0.064	0.664	0.037	0.668	0.074	0.67	0.512	0.422	0.509
0.044	0.029	0.552	0.173	0.732	0.036	0.028	0.38	0.042	0.645	0.338	0.432		0.045	0.043	0.566	0.188	0.745	0.05	0.042	0.393	0.055	0.658	0.351	0.432		0.045	0.056	0.577	0.201	0.756	0.062	0.054	0.404	0.067	0.669	0.363	0.432
0.675	0.661	0.068	0.026	0.046	0.575	0.089	0.78	0.507	0.186	0.025	0.605		0.677	0.675	0.082	0.04	0.061	0.589	0.104	0.794	0.521	0.2	0.038	0.606		0.677	0.686	0.094	0.052	0.073	0.601	0.116	0.806	0.533	0.212	0.05	0.606
0.013	0.217	0.033	0.72	0.303	0.062	0.717	0.003	0.533	0.186	0.09	0.662		0.014	0.232	0.048	0.733	0.317	0.076	0.731	0.017	0.547	0.2	0.105	0.663		0.014	0.245	0.061	0.744	0.329	0.089	0.743	0.03	0.56	0.213	0.119	0.663
0.12	0.062	0.098	0.604	0.144	0.438	0.08	0.142	0.153	0.495	0.058	0.776		0.121	0.076	0.112	0.617	0.159	0.451	0.095	0.158	0.168	0.51	0.072	0.777		0.121	0.089	0.124	0.628	0.171	0.463	0.108	0.172	0.182	0.523	0.085	0.777
-0.028	0.311	0.066	0.086	0.322	0.078	0.439	1.191	0.678	0.819	0.581	0.589		-0.027	0.325	0.081	0.101	0.337	0.094	0.455	1.205	0.693	0.833	0.594	0.591		-0.027	0.338	0.094	0.114	0.351	0.109	0.469	1.217	0.706	0.846	0.604	0.591
0.39	0.443	0.444	0.105	0.027	0.493	0.012	0.033	0.09	0.171	0.075	0.033		0.391	0.446	0.453	0.114	0.037	0.499	0.017	0.039	0.096	0.188	0.076	0.034		0.391	0.449	0.458	0.121	0.044	0.503	0.021	0.044	0.101	0.199	0.076	0.035
RepA1-192h	OD												RepA2-192h	OD												RepA3-192h	OD
0	0.277	0.058	0.971	0.06	0.089	0.456	0.081	0.649	0.213	0.746	0.194		0	0.277	0.058	0.973	0.066	0.095	0.461	0.095	0.653	0.213	0.746	0.195		0	0.277	0.058	0.975	0.072	0.1	0.466	0.105	0.657	0.213	0.746	0.195
0.032	0.168	0.461	0.058	0.663	0.027	0.667	0.057	0.731	0.567	0.426	0.586		0.032	0.179	0.474	0.072	0.676	0.041	0.681	0.069	0.745	0.581	0.434	0.586		0.031	0.187	0.485	0.084	0.687	0.053	0.692	0.079	0.757	0.594	0.44	0.586
0.073	0.048	0.553	0.2	0.76	0.055	0.046	0.452	0.066	0.652	0.349	0.457		0.072	0.061	0.567	0.215	0.773	0.069	0.059	0.465	0.079	0.665	0.361	0.456		0.072	0.072	0.577	0.226	0.784	0.081	0.071	0.476	0.091	0.676	0.372	0.456
0.748	0.673	0.082	0.046	0.064	0.67	0.12	0.874	0.534	0.235	0.054	0.699		0.748	0.685	0.096	0.06	0.079	0.684	0.135	0.888	0.548	0.249	0.066	0.7		0.748	0.696	0.107	0.072	0.09	0.695	0.146	0.9	0.559	0.261	0.078	0.7
0.03	0.221	0.05	0.805	0.362	0.087	0.737	0.027	0.599	0.24	0.128	0.675		0.03	0.236	0.065	0.817	0.376	0.102	0.75	0.042	0.613	0.255	0.143	0.675		0.03	0.247	0.077	0.827	0.387	0.114	0.761	0.054	0.625	0.267	0.155	0.675
0.173	0.092	0.122	0.651	0.167	0.47	0.114	0.179	0.196	0.563	0.09	0.815		0.173	0.106	0.135	0.664	0.181	0.483	0.129	0.195	0.212	0.577	0.103	0.815		0.172	0.117	0.147	0.674	0.193	0.494	0.142	0.209	0.226	0.59	0.114	0.815
-0.001	0.336	0.09	0.113	0.363	0.133	0.537	1.206	0.644	0.911	0.57	0.582		-0.002	0.349	0.105	0.128	0.379	0.149	0.553	1.22	0.659	0.925	0.581	0.582		-0.002	0.36	0.117	0.141	0.392	0.162	0.566	1.231	0.671	0.937	0.59	0.582
0.462	0.598	0.506	0.139	0.061	0.493	0.045	0.064	0.112	0.175	0.105	0.077		0.461	0.599	0.512	0.146	0.068	0.496	0.048	0.068	0.116	0.19	0.105	0.077		0.461	0.599	0.515	0.152	0.074	0.498	0.05	0.072	0.12	0.199	0.105	0.077

## Sheet: G14B
RepB1-0h	OD												RepB2-0h	OD												RepB3-0h	OD
0	0.039	0.012	0.018	0.032	0.024	0.002	0.011	0.012	0.014	0.029	0.03		0	0.039	0.013	0.019	0.033	0.025	0.003	0.012	0.013	0.015	0.029	0.029		0	0.039	0.013	0.019	0.033	0.026	0.003	0.013	0.013	0.015	0.029	0.028
-0.011	0.018	0.128	-0.015	-0.016	-0.005	-0.02	-0.027	-0.015	-0.011	0.028	0.005		-0.01	0.018	0.129	-0.015	-0.015	-0.004	-0.018	-0.025	-0.014	-0.01	0.027	0.006		-0.01	0.018	0.128	-0.015	-0.015	-0.004	-0.017	-0.025	-0.013	-0.009	0.026	0.006
-0.011	-0.005	-0.017	-0.014	0	0.007	-0.008	-0.013	-0.017	-0.014	0.019	0.008		-0.01	-0.004	-0.017	-0.013	0	0.008	-0.007	-0.012	-0.016	-0.013	0.02	0.009		-0.01	-0.004	-0.017	-0.013	0	0.008	-0.007	-0.012	-0.015	-0.012	0.021	0.008
-0.023	-0.025	-0.015	-0.023	-0.021	0	-0.026	0	-0.013	-0.027	0.01	-0.02		-0.022	-0.025	-0.014	-0.022	-0.021	0.001	-0.025	0.001	-0.012	-0.026	0.01	-0.018		-0.022	-0.025	-0.014	-0.022	-0.021	0.001	-0.025	0.001	-0.012	-0.025	0.01	-0.018
0.015	-0.007	0.001	-0.008	0.011	0.098	0.044	0.013	-0.011	-0.006	0.028	0.025		0.015	-0.006	0.002	-0.006	0.012	0.098	0.045	0.014	-0.01	-0.005	0.029	0.026		0.015	-0.006	0.003	-0.006	0.013	0.097	0.045	0.014	-0.009	-0.004	0.029	0.027
-0.024	-0.03	-0.018	-0.031	-0.035	-0.004	-0.007	-0.005	0.014	-0.016	-0.001	-0.019		-0.023	-0.029	-0.017	-0.03	-0.034	-0.004	-0.006	-0.003	0.015	-0.015	0	-0.018		-0.022	-0.029	-0.017	-0.03	-0.034	-0.003	-0.005	-0.003	0.015	-0.015	0.001	-0.017
-0.019	0.649	-0.031	-0.022	-0.03	-0.015	-0.014	-0.006	-0.008	-0.016	0.004	-0.013		-0.018	0.65	-0.03	-0.021	-0.029	-0.013	-0.013	-0.004	-0.006	-0.014	0.005	-0.012		-0.018	0.649	-0.03	-0.021	-0.029	-0.013	-0.013	-0.004	-0.006	-0.014	0.005	-0.012
-0.029	-0.003	0.137	-0.011	0.012	-0.031	-0.013	-0.018	0.016	0.077	-0.026	-0.022		-0.028	-0.001	0.137	-0.01	0.013	-0.03	-0.012	-0.016	0.017	0.077	-0.025	-0.021		-0.028	-0.001	0.137	-0.01	0.013	-0.029	-0.012	-0.016	0.018	0.077	-0.025	-0.021
RepB1-24h	OD												RepB2-24h	OD												RepB3-24h	OD
0	0.054	0.057	0.062	0.069	0.072	0.075	0.038	0.065	0.034	0.015	0.044		0	0.045	0.052	0.057	0.066	0.068	0.073	0.035	0.063	0.028	0.014	0.043		0	0.045	0.046	0.051	0.063	0.064	0.07	0.031	0.061	0.024	0.014	0.044
0.043	0.078	0.23	0.076	0.104	0.078	0.077	0.039	0.081	0.074	0.045	0.052		0.033	0.079	0.231	0.078	0.106	0.08	0.078	0.04	0.082	0.075	0.044	0.051		0.027	0.079	0.232	0.078	0.107	0.081	0.079	0.041	0.084	0.076	0.045	0.051
0.019	0.061	0.077	0.085	0.1	0.077	0.092	0.079	0.081	0.062	0.072	0.03		0.012	0.063	0.078	0.087	0.101	0.079	0.093	0.08	0.083	0.063	0.072	0.03		0.009	0.063	0.079	0.088	0.102	0.08	0.094	0.082	0.084	0.064	0.073	0.03
0.012	0.137	0.091	0.074	0.064	0.08	0.076	0.074	0.084	0.046	0.067	-0.022		0.007	0.139	0.093	0.076	0.066	0.082	0.077	0.076	0.085	0.046	0.068	-0.023		0.006	0.14	0.094	0.077	0.067	0.083	0.078	0.077	0.087	0.047	0.069	-0.022
0.013	0.095	0.125	0.101	0.142	0.12	0.193	0.109	0.107	0.08	0.081	0.098		0.006	0.097	0.127	0.103	0.143	0.122	0.194	0.11	0.108	0.082	0.081	0.098		0.005	0.098	0.128	0.104	0.144	0.123	0.195	0.111	0.11	0.083	0.082	0.098
-0.014	0.049	0.082	0.046	0.091	0.068	0.061	0.065	0.076	0.044	0.041	-0.006		-0.016	0.05	0.083	0.047	0.091	0.07	0.062	0.066	0.077	0.046	0.039	-0.007		-0.016	0.05	0.084	0.049	0.092	0.071	0.063	0.067	0.079	0.048	0.039	-0.007
-0.015	0.637	0.069	0.069	0.03	0.062	0.065	0.075	0.077	0.066	0.041	-0.011		-0.017	0.638	0.071	0.07	0.032	0.063	0.066	0.075	0.078	0.066	0.038	-0.012		-0.017	0.638	0.072	0.071	0.032	0.064	0.066	0.075	0.079	0.067	0.035	-0.012
-0.01	0.054	0.407	0.057	0.052	-0.008	0.006	-0.01	0.01	-0.006	-0.021	-0.009		-0.011	0.046	0.408	0.054	0.048	-0.015	-0.001	-0.017	0.009	-0.007	-0.022	-0.01		-0.011	0.036	0.407	0.052	0.045	-0.02	-0.002	-0.022	0.009	-0.007	-0.022	-0.01
RepB1-48h	OD												RepB2-48h	OD												RepB3-48h	OD
0	0.209	0.058	0.201	0.08	0.102	0.164	0.086	0.192	0.133	0.161	0.234		0	0.21	0.064	0.209	0.088	0.109	0.172	0.094	0.201	0.139	0.168	0.235		0	0.208	0.067	0.213	0.093	0.114	0.177	0.099	0.206	0.143	0.172	0.236
0.047	0.12	0.418	0.082	0.278	0.071	0.228	0.061	0.26	0.21	0.091	0.293		0.047	0.13	0.427	0.092	0.288	0.08	0.238	0.07	0.27	0.219	0.101	0.297		0.046	0.136	0.433	0.098	0.294	0.087	0.245	0.075	0.277	0.226	0.106	0.299
0.032	0.073	0.222	0.148	0.265	0.091	0.09	0.152	0.093	0.146	0.242	0.226		0.035	0.082	0.232	0.159	0.275	0.1	0.099	0.162	0.103	0.156	0.251	0.231		0.034	0.087	0.238	0.166	0.282	0.106	0.105	0.169	0.11	0.162	0.258	0.233
0.212	0.367	0.13	0.08	0.075	0.182	0.083	0.252	0.277	0.145	0.068	0.094		0.214	0.377	0.139	0.09	0.085	0.19	0.092	0.262	0.286	0.153	0.077	0.097		0.214	0.384	0.146	0.097	0.093	0.196	0.099	0.268	0.293	0.158	0.085	0.097
0.063	0.204	0.123	0.26	0.177	0.147	0.323	0.082	0.32	0.099	0.105	0.259		0.067	0.217	0.132	0.27	0.185	0.156	0.331	0.092	0.329	0.108	0.116	0.266		0.068	0.224	0.137	0.277	0.19	0.162	0.337	0.097	0.335	0.115	0.123	0.268
0.033	0.046	0.111	0.125	0.156	0.115	0.084	0.095	0.106	0.069	0.069	0.236		0.036	0.056	0.122	0.134	0.166	0.125	0.094	0.106	0.116	0.079	0.08	0.238		0.038	0.063	0.13	0.14	0.174	0.132	0.102	0.113	0.123	0.086	0.087	0.238
0.009	0.465	0.096	0.101	0.06	0.068	0.082	0.289	0.205	0.152	0.177	0.112		0.013	0.475	0.106	0.113	0.071	0.079	0.092	0.3	0.216	0.163	0.188	0.113		0.014	0.481	0.114	0.121	0.078	0.087	0.1	0.307	0.225	0.171	0.197	0.112
0.013	0.119	0.288	0.107	0.084	0.105	0.052	0.048	0.04	0.018	0.003	-0.023		0.015	0.129	0.298	0.119	0.095	0.113	0.059	0.055	0.048	0.024	0.007	-0.021		0.013	0.136	0.304	0.126	0.101	0.118	0.062	0.059	0.052	0.027	0.008	-0.021
RepB1-72h	OD												RepB2-72h	OD												RepB3-72h	OD
0	0.336	0.059	0.612	0.086	0.115	0.321	0.111	0.385	0.169	0.312	0.436		0	0.334	0.066	0.618	0.095	0.124	0.33	0.121	0.395	0.177	0.319	0.434		0	0.333	0.069	0.621	0.101	0.129	0.335	0.126	0.401	0.181	0.322	0.435
0.039	0.139	0.543	0.08	0.516	0.072	0.466	0.071	0.502	0.33	0.234	0.506		0.038	0.151	0.554	0.092	0.527	0.084	0.478	0.08	0.514	0.341	0.244	0.506		0.036	0.157	0.56	0.099	0.534	0.092	0.486	0.086	0.521	0.348	0.249	0.506
0.037	0.082	0.605	0.172	0.511	0.104	0.097	0.224	0.105	0.335	0.45	0.386		0.038	0.094	0.616	0.186	0.522	0.117	0.11	0.237	0.118	0.346	0.461	0.39		0.039	0.101	0.623	0.194	0.529	0.124	0.117	0.245	0.125	0.353	0.468	0.391
0.422	0.629	0.146	0.082	0.086	0.326	0.122	0.522	0.533	0.172	0.08	0.271		0.423	0.642	0.159	0.097	0.1	0.339	0.135	0.535	0.544	0.183	0.093	0.275		0.424	0.649	0.167	0.105	0.108	0.346	0.142	0.542	0.551	0.19	0.101	0.275
0.069	0.301	0.136	0.436	0.302	0.167	0.465	0.1	0.472	0.134	0.137	0.488		0.072	0.316	0.149	0.448	0.314	0.181	0.477	0.11	0.483	0.146	0.152	0.494		0.074	0.324	0.157	0.456	0.321	0.189	0.485	0.117	0.49	0.154	0.161	0.497
0.062	0.066	0.151	0.214	0.177	0.219	0.11	0.116	0.134	0.11	0.101	0.765		0.064	0.079	0.165	0.226	0.191	0.234	0.124	0.13	0.148	0.123	0.114	0.767		0.065	0.086	0.174	0.234	0.2	0.242	0.133	0.139	0.156	0.131	0.122	0.768
-0.002	0.531	0.109	0.125	0.201	0.088	0.121	0.929	0.479	0.406	0.61	0.498		-0.001	0.547	0.123	0.14	0.217	0.104	0.137	0.94	0.494	0.422	0.625	0.498		-0.001	0.555	0.131	0.149	0.226	0.113	0.146	0.948	0.503	0.432	0.633	0.497
0.067	0.186	0.294	0.137	0.114	0.446	0.053	0.066	0.046	0.024	0.006	-0.028		0.067	0.196	0.306	0.15	0.128	0.455	0.061	0.075	0.055	0.03	0.008	-0.028		0.068	0.202	0.313	0.158	0.136	0.46	0.065	0.081	0.06	0.032	0.01	-0.027
RepB1-96h	OD												RepB2-96h	OD												RepB3-96h	OD
0	0.316	0.043	0.788	0.07	0.098	0.346	0.097	0.443	0.15	0.352	0.474		0	0.316	0.046	0.792	0.076	0.103	0.352	0.103	0.449	0.154	0.355	0.474		0	0.316	0.049	0.794	0.08	0.107	0.356	0.108	0.455	0.158	0.358	0.474
0.022	0.138	0.524	0.074	0.565	0.064	0.507	0.062	0.528	0.356	0.279	0.513		0.021	0.144	0.53	0.081	0.572	0.072	0.514	0.067	0.534	0.363	0.285	0.512		0.021	0.149	0.535	0.087	0.578	0.078	0.521	0.072	0.54	0.369	0.291	0.511
0.027	0.08	0.59	0.174	0.582	0.094	0.089	0.25	0.095	0.403	0.43	0.359		0.029	0.088	0.596	0.182	0.588	0.101	0.097	0.258	0.102	0.41	0.436	0.359		0.029	0.094	0.602	0.189	0.594	0.107	0.103	0.265	0.11	0.416	0.443	0.36
0.478	0.673	0.147	0.077	0.077	0.386	0.12	0.585	0.519	0.16	0.067	0.343		0.479	0.681	0.155	0.086	0.085	0.393	0.127	0.592	0.527	0.166	0.075	0.343		0.479	0.687	0.163	0.093	0.093	0.4	0.135	0.599	0.533	0.172	0.082	0.344
0.054	0.305	0.133	0.497	0.323	0.156	0.488	0.088	0.467	0.133	0.126	0.56		0.058	0.314	0.141	0.505	0.331	0.164	0.496	0.094	0.474	0.14	0.134	0.561		0.06	0.322	0.149	0.511	0.338	0.172	0.502	0.1	0.48	0.147	0.142	0.564
0.055	0.074	0.164	0.245	0.175	0.26	0.103	0.117	0.127	0.115	0.093	0.797		0.057	0.082	0.173	0.253	0.184	0.269	0.111	0.125	0.135	0.123	0.101	0.797		0.058	0.089	0.181	0.26	0.192	0.277	0.119	0.132	0.143	0.131	0.108	0.797
-0.021	0.541	0.113	0.13	0.275	0.079	0.149	1.056	0.534	0.584	0.659	0.614		-0.019	0.551	0.122	0.139	0.284	0.088	0.158	1.064	0.543	0.593	0.668	0.614		-0.019	0.56	0.129	0.147	0.293	0.096	0.167	1.07	0.551	0.602	0.675	0.614
0.104	0.213	0.354	0.134	0.103	0.542	0.034	0.046	0.035	-0.003	-0.012	-0.024		0.104	0.219	0.362	0.143	0.112	0.548	0.039	0.052	0.04	0.001	-0.011	-0.024		0.104	0.225	0.368	0.15	0.12	0.552	0.043	0.057	0.044	0.003	-0.011	-0.024
RepB1-120h	OD												RepB2-120h	OD												RepB3-120h	OD
0	0.289	0.035	1.036	0.059	0.09	0.39	0.088	0.511	0.146	0.459	0.503		0	0.29	0.04	1.04	0.065	0.097	0.397	0.095	0.516	0.149	0.462	0.504		0	0.29	0.042	1.043	0.07	0.101	0.402	0.1	0.522	0.152	0.462	0.504
0.019	0.135	0.487	0.067	0.647	0.051	0.585	0.058	0.548	0.421	0.352	0.56		0.019	0.142	0.495	0.076	0.655	0.06	0.594	0.065	0.553	0.428	0.359	0.56		0.019	0.15	0.502	0.085	0.663	0.069	0.602	0.071	0.561	0.436	0.366	0.56
0.029	0.074	0.556	0.169	0.671	0.081	0.078	0.32	0.087	0.557	0.398	0.347		0.029	0.084	0.564	0.179	0.679	0.089	0.087	0.329	0.096	0.565	0.406	0.349		0.028	0.093	0.572	0.188	0.686	0.098	0.095	0.339	0.105	0.572	0.414	0.349
0.569	0.674	0.138	0.064	0.065	0.491	0.12	0.682	0.505	0.155	0.046	0.491		0.569	0.683	0.147	0.074	0.075	0.499	0.129	0.69	0.513	0.163	0.056	0.492		0.567	0.691	0.156	0.083	0.084	0.507	0.138	0.698	0.521	0.171	0.065	0.493
0.047	0.279	0.119	0.593	0.355	0.137	0.523	0.071	0.493	0.148	0.11	0.592		0.049	0.289	0.128	0.601	0.364	0.146	0.533	0.08	0.502	0.157	0.12	0.594		0.049	0.298	0.137	0.609	0.372	0.156	0.541	0.088	0.509	0.165	0.13	0.594
0.066	0.072	0.155	0.297	0.162	0.381	0.095	0.127	0.139	0.124	0.072	0.77		0.066	0.082	0.165	0.306	0.172	0.391	0.105	0.137	0.149	0.134	0.082	0.771		0.065	0.091	0.175	0.314	0.183	0.4	0.115	0.146	0.158	0.143	0.091	0.771
-0.02	0.514	0.103	0.124	0.324	0.065	0.221	1.183	0.714	0.793	0.717	0.648		-0.02	0.525	0.113	0.134	0.334	0.075	0.232	1.191	0.724	0.804	0.727	0.649		-0.022	0.535	0.123	0.144	0.344	0.085	0.242	1.198	0.734	0.814	0.736	0.649
0.192	0.275	0.433	0.131	0.083	0.617	0.027	0.029	0.051	-0.02	0.036	-0.015		0.193	0.283	0.441	0.14	0.093	0.622	0.032	0.035	0.056	-0.018	0.037	-0.014		0.193	0.289	0.449	0.149	0.102	0.626	0.035	0.04	0.06	-0.017	0.037	-0.014
RepB1-144h	OD												RepB2-144h	OD												RepB3-144h	OD
0	0.278	0.066	1.08	0.089	0.12	0.439	0.123	0.596	0.196	0.557	0.562		0	0.278	0.069	1.083	0.095	0.125	0.445	0.129	0.601	0.199	0.559	0.561		0	0.278	0.071	1.085	0.1	0.129	0.449	0.134	0.606	0.202	0.56	0.562
0.029	0.165	0.5	0.099	0.711	0.075	0.639	0.08	0.615	0.513	0.436	0.618		0.027	0.171	0.507	0.106	0.719	0.084	0.646	0.086	0.622	0.521	0.443	0.617		0.027	0.176	0.512	0.112	0.725	0.09	0.654	0.091	0.629	0.527	0.449	0.617
0.056	0.104	0.57	0.204	0.724	0.106	0.106	0.406	0.117	0.669	0.418	0.379		0.056	0.113	0.577	0.213	0.731	0.114	0.114	0.415	0.126	0.676	0.425	0.381		0.055	0.12	0.583	0.22	0.737	0.12	0.122	0.423	0.133	0.682	0.432	0.38
0.655	0.696	0.163	0.092	0.095	0.588	0.157	0.779	0.527	0.195	0.075	0.621		0.655	0.703	0.171	0.101	0.104	0.596	0.165	0.787	0.534	0.202	0.083	0.621		0.653	0.71	0.179	0.109	0.112	0.602	0.172	0.794	0.541	0.209	0.091	0.62
0.065	0.291	0.145	0.689	0.408	0.165	0.565	0.1	0.583	0.217	0.147	0.589		0.067	0.3	0.153	0.696	0.416	0.174	0.573	0.109	0.59	0.225	0.156	0.591		0.068	0.308	0.16	0.703	0.423	0.181	0.581	0.116	0.597	0.232	0.165	0.591
0.102	0.111	0.193	0.388	0.197	0.532	0.139	0.184	0.208	0.293	0.119	0.788		0.102	0.119	0.203	0.396	0.207	0.541	0.148	0.192	0.217	0.301	0.127	0.788		0.101	0.126	0.211	0.403	0.216	0.55	0.157	0.2	0.226	0.309	0.135	0.787
0.001	0.525	0.137	0.163	0.376	0.111	0.332	1.23	0.79	0.893	0.682	0.627		0	0.535	0.146	0.172	0.386	0.12	0.342	1.236	0.799	0.902	0.689	0.627		-0.001	0.543	0.154	0.18	0.395	0.129	0.351	1.243	0.807	0.91	0.696	0.627
0.274	0.406	0.54	0.175	0.119	0.663	0.067	0.07	0.113	0.013	0.086	0.03		0.274	0.412	0.547	0.183	0.128	0.667	0.071	0.075	0.117	0.013	0.085	0.03		0.274	0.416	0.552	0.189	0.135	0.67	0.074	0.078	0.121	0.013	0.085	0.03
RepB1-168h	OD												RepB2-168h	OD												RepB3-168h	OD
0	0.212	0.022	1.065	0.045	0.073	0.412	0.077	0.62	0.17	0.581	0.593		0	0.211	0.022	1.067	0.049	0.077	0.416	0.082	0.625	0.172	0.58	0.594		0	0.211	0.02	1.068	0.053	0.079	0.421	0.088	0.631	0.173	0.578	0.594
-0.016	0.122	0.454	0.056	0.683	0.025	0.602	0.027	0.638	0.544	0.42	0.604		-0.017	0.126	0.46	0.063	0.691	0.033	0.61	0.033	0.646	0.551	0.427	0.604		-0.018	0.131	0.467	0.072	0.7	0.043	0.62	0.041	0.655	0.56	0.435	0.604
0.018	0.058	0.515	0.164	0.689	0.059	0.063	0.417	0.071	0.648	0.361	0.435		0.014	0.066	0.521	0.173	0.696	0.067	0.071	0.426	0.08	0.655	0.368	0.436		0.01	0.076	0.53	0.184	0.705	0.076	0.081	0.436	0.09	0.664	0.377	0.436
0.684	0.646	0.113	0.048	0.05	0.61	0.122	0.808	0.477	0.168	0.032	0.698		0.681	0.653	0.121	0.057	0.058	0.617	0.131	0.815	0.484	0.176	0.04	0.698		0.68	0.662	0.132	0.068	0.069	0.626	0.141	0.825	0.494	0.185	0.051	0.698
0.018	0.23	0.099	0.716	0.389	0.125	0.517	0.059	0.59	0.211	0.11	0.54		0.017	0.239	0.107	0.724	0.397	0.133	0.526	0.069	0.598	0.219	0.119	0.54		0.014	0.25	0.118	0.733	0.407	0.144	0.537	0.08	0.607	0.229	0.13	0.54
0.073	0.079	0.154	0.483	0.155	0.535	0.106	0.155	0.188	0.549	0.079	0.75		0.07	0.087	0.164	0.491	0.165	0.545	0.116	0.164	0.198	0.557	0.087	0.751		0.064	0.096	0.175	0.501	0.177	0.557	0.127	0.176	0.21	0.568	0.097	0.751
-0.041	0.445	0.098	0.127	0.35	0.107	0.453	1.164	0.668	0.911	0.583	0.554		-0.045	0.454	0.107	0.136	0.361	0.117	0.463	1.172	0.677	0.92	0.589	0.555		-0.049	0.465	0.118	0.148	0.373	0.129	0.475	1.181	0.688	0.931	0.595	0.555
0.299	0.486	0.56	0.139	0.066	0.624	0.032	0.027	0.078	-0.032	0.069	0.068		0.299	0.49	0.567	0.147	0.074	0.628	0.034	0.03	0.081	-0.034	0.069	0.068		0.299	0.493	0.573	0.155	0.083	0.63	0.036	0.033	0.083	-0.035	0.069	0.068
RepB1-192h	OD												RepB2-192h	OD												RepB3-192h	OD
0	0.187	0.026	1.093	0.054	0.074	0.422	0.077	0.663	0.188	0.65	0.513		0	0.186	0.024	1.093	0.057	0.076	0.425	0.08	0.666	0.188	0.649	0.512		0	0.186	0.022	1.093	0.059	0.077	0.427	0.083	0.669	0.187	0.649	0.512
-0.017	0.123	0.466	0.062	0.692	0.027	0.605	0.024	0.708	0.613	0.427	0.638		-0.018	0.125	0.47	0.068	0.698	0.034	0.612	0.029	0.715	0.62	0.432	0.638		-0.018	0.127	0.475	0.074	0.704	0.04	0.617	0.034	0.72	0.625	0.437	0.637
0.031	0.055	0.509	0.171	0.695	0.061	0.062	0.467	0.075	0.637	0.353	0.486		0.029	0.062	0.514	0.179	0.701	0.068	0.069	0.474	0.083	0.644	0.36	0.486		0.029	0.068	0.52	0.186	0.706	0.074	0.075	0.481	0.089	0.649	0.365	0.486
0.732	0.639	0.106	0.05	0.047	0.679	0.139	0.881	0.482	0.191	0.04	0.781		0.73	0.645	0.114	0.058	0.054	0.686	0.146	0.888	0.489	0.198	0.047	0.78		0.73	0.651	0.12	0.065	0.061	0.691	0.152	0.893	0.495	0.204	0.053	0.78
0.012	0.212	0.095	0.778	0.428	0.135	0.514	0.071	0.64	0.249	0.122	0.584		0.01	0.22	0.103	0.784	0.435	0.142	0.522	0.079	0.646	0.255	0.13	0.584		0.01	0.227	0.109	0.79	0.441	0.149	0.528	0.087	0.652	0.262	0.137	0.584
0.097	0.092	0.159	0.503	0.157	0.558	0.12	0.17	0.213	0.588	0.089	0.843		0.096	0.099	0.167	0.51	0.166	0.566	0.128	0.178	0.221	0.595	0.095	0.843		0.096	0.105	0.174	0.516	0.173	0.572	0.136	0.185	0.228	0.601	0.101	0.843
-0.034	0.358	0.101	0.134	0.371	0.142	0.538	1.146	0.637	0.972	0.549	0.517		-0.035	0.367	0.109	0.142	0.38	0.151	0.547	1.152	0.645	0.979	0.551	0.517		-0.035	0.373	0.116	0.149	0.387	0.158	0.554	1.158	0.652	0.985	0.553	0.517
0.326	0.606	0.601	0.149	0.062	0.608	0.043	0.029	0.077	-0.016	0.095	0.108		0.326	0.608	0.605	0.155	0.069	0.61	0.044	0.03	0.078	-0.016	0.094	0.107		0.326	0.608	0.609	0.16	0.074	0.61	0.045	0.031	0.078	-0.016	0.094	0.107

## Sheet: G16A
RepA1-0h	OD												RepA2-0h	OD												RepA3-0h	OD
0	0.025	0.012	-0.003	0.05	0.005	0.024	0.005	-0.005	0.033	0.036	-0.01		0	0.024	0.012	-0.002	0.049	0.006	0.024	0.006	-0.004	0.033	0.036	-0.01		0	0.024	0.011	-0.003	0.049	0.005	0.024	0.006	-0.004	0.032	0.036	-0.01
0.023	-0.022	0.091	-0.036	0.011	-0.043	-0.044	-0.022	-0.036	0.014	-0.009	-0.033		0.024	-0.022	0.091	-0.035	0.012	-0.042	-0.043	-0.021	-0.035	0.014	-0.008	-0.032		0.024	-0.022	0.09	-0.035	0.011	-0.042	-0.043	-0.021	-0.035	0.013	-0.008	-0.032
-0.017	-0.023	-0.011	-0.027	0.041	-0.026	-0.023	-0.025	-0.033	-0.024	-0.025	-0.034		-0.017	-0.023	-0.011	-0.026	0.04	-0.025	-0.022	-0.024	-0.032	-0.023	-0.024	-0.033		-0.017	-0.023	-0.012	-0.027	0.04	-0.025	-0.022	-0.024	-0.032	-0.023	-0.024	-0.033
-0.033	-0.038	-0.022	-0.035	0.018	-0.022	-0.03	-0.013	-0.041	0.006	-0.022	-0.049		-0.032	-0.038	-0.022	-0.034	0.018	-0.021	-0.029	-0.012	-0.04	0.006	-0.022	-0.048		-0.033	-0.038	-0.022	-0.035	0.017	-0.021	-0.029	-0.012	-0.04	0.005	-0.022	-0.048
-0.012	0.019	0.026	0.021	0.032	0.007	0.012	0.023	0.016	0.013	-0.001	-0.019		-0.011	0.019	0.026	0.021	0.032	0.008	0.013	0.023	0.017	0.014	0	-0.018		-0.012	0.018	0.025	0.02	0.032	0.007	0.012	0.022	0.017	0.014	0	-0.018
-0.024	-0.029	-0.036	-0.012	-0.016	-0.034	-0.014	-0.014	-0.008	-0.008	-0.03	-0.027		-0.023	-0.029	-0.035	-0.012	-0.016	-0.033	-0.013	-0.014	-0.007	-0.006	-0.029	-0.026		-0.024	-0.029	-0.035	-0.012	-0.016	-0.034	-0.013	-0.014	-0.008	-0.007	-0.029	-0.025
-0.046	0.422	-0.034	-0.036	0.011	-0.026	-0.027	-0.021	-0.026	-0.004	-0.029	-0.041		-0.045	0.422	-0.033	-0.035	0.012	-0.025	-0.026	-0.02	-0.025	-0.003	-0.028	-0.04		-0.045	0.421	-0.033	-0.035	0.011	-0.025	-0.027	-0.02	-0.025	-0.003	-0.028	-0.04
-0.042	-0.022	-0.022	-0.026	0.011	-0.037	-0.033	-0.024	-0.008	0.592	-0.022	-0.016		-0.041	-0.021	-0.021	-0.026	0.011	-0.036	-0.032	-0.023	-0.007	0.593	-0.02	-0.014		-0.041	-0.021	-0.021	-0.026	0.011	-0.036	-0.032	-0.023	-0.007	0.592	-0.021	-0.015
RepA1-24h	OD												RepA2-24h	OD												RepA3-24h	OD
0	0.037	0.001	0.006	0.025	0.025	0.031	0.018	0.015	0.044	0.047	0.059		0	0.037	0.001	0.006	0.025	0.024	0.031	0.019	0.015	0.044	0.047	0.059		0	0.038	0.002	0.007	0.026	0.025	0.032	0.02	0.016	0.045	0.048	0.06
0.039	0.004	0.155	-0.019	0.068	-0.023	0.022	-0.06	0.019	0.029	-0.029	0.066		0.039	0.004	0.154	-0.02	0.068	-0.023	0.023	-0.059	0.02	0.031	-0.029	0.066		0.04	0.005	0.156	-0.019	0.069	-0.023	0.023	-0.057	0.022	0.032	-0.028	0.068
-0.004	-0.035	0.037	0.003	0.093	0.015	0.022	0.03	0.003	-0.001	0.036	0.042		-0.004	-0.036	0.036	0.005	0.096	0.017	0.025	0.033	0.005	0.002	0.037	0.042		-0.002	-0.035	0.036	0.006	0.098	0.02	0.028	0.035	0.008	0.004	0.038	0.043
0.023	0.049	0.004	-0.017	0.029	0.024	0.006	0.046	0.006	0.04	0.01	-0.026		0.023	0.048	0.006	-0.015	0.031	0.026	0.008	0.049	0.009	0.043	0.011	-0.026		0.024	0.048	0.008	-0.013	0.034	0.029	0.01	0.052	0.012	0.047	0.012	-0.025
-0.041	0.042	0.024	0.053	0.043	0.02	0.12	-0.017	0.111	0.021	0.006	0.03		-0.041	0.041	0.025	0.056	0.044	0.023	0.123	-0.014	0.115	0.025	0.007	0.03		-0.04	0.042	0.026	0.058	0.046	0.026	0.125	-0.012	0.118	0.028	0.008	0.031
-0.021	-0.054	-0.01	0.002	0.037	-0.017	0.013	0.009	0.017	0.006	-0.008	0.017		-0.021	-0.054	-0.009	0.004	0.038	-0.015	0.014	0.011	0.02	0.009	-0.008	0.017		-0.02	-0.053	-0.008	0.006	0.039	-0.012	0.015	0.014	0.023	0.012	-0.007	0.019
-0.041	0.295	-0.004	-0.007	-0.04	-0.003	0.008	0.045	0.021	0.01	-0.001	-0.012		-0.041	0.295	-0.005	-0.008	-0.04	-0.002	0.009	0.047	0.022	0.011	-0.001	-0.012		-0.04	0.296	-0.004	-0.008	-0.039	-0.001	0.009	0.048	0.024	0.012	0	-0.011
-0.008	0.004	-0.003	-0.013	-0.021	-0.019	-0.029	-0.02	0.007	0.003	-0.009	-0.029		-0.007	0.004	-0.003	-0.013	-0.021	-0.019	-0.029	-0.02	0.007	0.003	-0.009	-0.029		-0.006	0.005	-0.002	-0.012	-0.02	-0.018	-0.028	-0.019	0.008	0.004	-0.008	-0.028
RepA1-48h	OD												RepA2-48h	OD												RepA3-48h	OD
0	0.248	-0.003	0.173	0.025	0.049	0.142	0.055	0.161	0.1	0.171	0.274		0	0.248	-0.002	0.178	0.037	0.05	0.15	0.062	0.161	0.103	0.171	0.274		0	0.249	0	0.184	0.045	0.052	0.156	0.067	0.163	0.106	0.172	0.275
0.03	0.073	0.331	0	0.263	0.01	0.23	-0.056	0.248	0.168	0.079	0.313		0.03	0.085	0.345	0.013	0.278	0.026	0.244	-0.044	0.261	0.183	0.092	0.313		0.03	0.095	0.354	0.023	0.289	0.038	0.256	-0.035	0.27	0.194	0.102	0.314
0.001	-0.006	0.324	0.049	0.281	0.029	0.035	0.143	0.029	0.115	0.25	0.214		0.002	0.008	0.342	0.064	0.297	0.044	0.051	0.158	0.043	0.13	0.264	0.215		0.003	0.019	0.354	0.074	0.308	0.055	0.063	0.169	0.054	0.14	0.275	0.216
0.211	0.347	0.056	-0.003	0.041	0.162	0.055	0.256	0.269	0.123	0.02	0.091		0.212	0.363	0.072	0.012	0.06	0.178	0.071	0.271	0.285	0.14	0.036	0.091		0.213	0.374	0.084	0.024	0.072	0.189	0.083	0.283	0.296	0.152	0.047	0.092
0.003	0.156	0.049	0.23	0.136	0.038	0.43	0.005	0.375	0.05	0.06	0.281		0.003	0.174	0.066	0.246	0.153	0.056	0.445	0.02	0.391	0.067	0.078	0.282		0.004	0.187	0.078	0.258	0.165	0.069	0.457	0.031	0.402	0.079	0.09	0.283
0.029	-0.01	0.03	0.104	0.08	0.058	0.031	0.043	0.049	0.039	0.013	0.52		0.029	0.006	0.045	0.122	0.098	0.076	0.049	0.06	0.068	0.057	0.032	0.521		0.031	0.018	0.057	0.134	0.111	0.089	0.062	0.074	0.081	0.07	0.045	0.522
-0.046	0.243	0.027	0.018	0.025	0.013	0.017	0.33	0.233	0.094	0.211	0.2		-0.046	0.262	0.044	0.035	0.043	0.032	0.037	0.351	0.253	0.114	0.228	0.201		-0.045	0.276	0.057	0.048	0.055	0.045	0.051	0.365	0.267	0.129	0.241	0.202
0.052	0.059	0.049	0.022	0.012	0.053	-0.026	0.005	0.004	0.005	-0.011	-0.025		0.053	0.064	0.06	0.033	0.025	0.062	-0.016	0.015	0.014	0.016	-0.002	-0.026		0.054	0.068	0.066	0.039	0.033	0.068	-0.011	0.021	0.021	0.023	0.003	-0.025
RepA1-72h	OD												RepA2-72h	OD												RepA3-72h	OD
0	0.359	-0.004	0.734	0.019	0.057	0.29	0.076	0.362	0.11	0.36	0.417		0	0.359	-0.004	0.738	0.028	0.059	0.297	0.084	0.363	0.113	0.36	0.417		0	0.36	-0.003	0.741	0.035	0.061	0.302	0.089	0.363	0.115	0.36	0.417
0.019	0.077	0.409	0	0.49	-0.001	0.472	-0.054	0.414	0.271	0.234	0.439		0.019	0.086	0.419	0.012	0.501	0.012	0.482	-0.045	0.424	0.284	0.247	0.439		0.019	0.093	0.427	0.021	0.511	0.021	0.492	-0.037	0.433	0.295	0.257	0.439
0.009	-0.003	0.439	0.069	0.494	0.022	0.03	0.293	0.025	0.305	0.334	0.241		0.009	0.009	0.454	0.081	0.505	0.034	0.042	0.305	0.037	0.319	0.349	0.241		0.009	0.02	0.465	0.091	0.515	0.044	0.053	0.314	0.046	0.329	0.361	0.241
0.434	0.534	0.066	-0.003	0.039	0.338	0.078	0.496	0.465	0.107	0.022	0.276		0.435	0.544	0.078	0.01	0.054	0.35	0.091	0.508	0.478	0.12	0.04	0.276		0.435	0.554	0.088	0.02	0.065	0.359	0.102	0.518	0.488	0.131	0.055	0.276
0.004	0.224	0.048	0.408	0.207	0.028	0.657	0.013	0.448	0.069	0.075	0.623		0.004	0.238	0.061	0.42	0.221	0.042	0.668	0.025	0.461	0.083	0.094	0.623		0.004	0.248	0.072	0.43	0.232	0.054	0.679	0.034	0.471	0.094	0.109	0.623
0.105	0.006	0.046	0.196	0.07	0.183	0.036	0.074	0.065	0.051	0.015	0.656		0.105	0.018	0.058	0.209	0.085	0.196	0.049	0.088	0.079	0.066	0.033	0.656		0.105	0.029	0.068	0.22	0.097	0.208	0.061	0.099	0.09	0.077	0.046	0.656
-0.055	0.27	0.04	0.029	0.174	0.006	0.087	0.896	0.532	0.448	0.434	0.597		-0.055	0.284	0.052	0.042	0.189	0.021	0.102	0.91	0.546	0.463	0.449	0.598		-0.055	0.296	0.063	0.053	0.201	0.033	0.115	0.921	0.558	0.476	0.461	0.597
0.208	0.174	0.24	0.039	0.007	0.305	-0.033	-0.002	0	-0.011	-0.012	-0.038		0.209	0.175	0.246	0.045	0.015	0.311	-0.029	0.004	0.006	-0.004	-0.006	-0.038		0.209	0.177	0.25	0.049	0.021	0.316	-0.025	0.008	0.01	0	-0.002	-0.038
RepA1-96h	OD												RepA2-96h	OD												RepA3-96h	OD
0	0.349	-0.001	0.953	0.022	0.064	0.33	0.086	0.419	0.123	0.453	0.465		0	0.349	0	0.957	0.031	0.066	0.336	0.093	0.421	0.126	0.454	0.466		0	0.349	0.002	0.96	0.039	0.069	0.341	0.099	0.422	0.129	0.454	0.466
0.019	0.087	0.409	0.009	0.558	0.004	0.556	-0.048	0.443	0.322	0.293	0.493		0.019	0.096	0.419	0.021	0.569	0.016	0.566	-0.039	0.453	0.335	0.306	0.493		0.019	0.104	0.428	0.032	0.579	0.026	0.576	-0.03	0.462	0.347	0.317	0.492
0.015	0.001	0.424	0.084	0.572	0.027	0.036	0.359	0.034	0.4	0.336	0.242		0.015	0.013	0.437	0.096	0.583	0.039	0.048	0.37	0.045	0.413	0.35	0.243		0.015	0.024	0.449	0.106	0.593	0.049	0.059	0.38	0.056	0.425	0.364	0.243
0.511	0.55	0.073	0.004	0.046	0.415	0.096	0.577	0.466	0.105	0.03	0.367		0.512	0.56	0.085	0.016	0.06	0.426	0.108	0.589	0.479	0.119	0.047	0.367		0.512	0.57	0.096	0.027	0.072	0.437	0.12	0.599	0.49	0.131	0.063	0.367
0.006	0.225	0.053	0.487	0.248	0.037	0.709	0.021	0.508	0.097	0.095	0.737		0.006	0.238	0.066	0.498	0.261	0.051	0.721	0.033	0.521	0.11	0.113	0.738		0.006	0.25	0.078	0.509	0.273	0.063	0.731	0.044	0.532	0.123	0.13	0.739
0.168	0.02	0.057	0.255	0.087	0.272	0.058	0.108	0.099	0.089	0.043	0.661		0.168	0.033	0.069	0.268	0.101	0.286	0.072	0.121	0.112	0.102	0.058	0.662		0.168	0.045	0.08	0.28	0.115	0.299	0.085	0.134	0.126	0.115	0.072	0.662
-0.052	0.289	0.056	0.048	0.266	0.023	0.15	0.939	0.794	0.537	0.483	0.617		-0.052	0.303	0.068	0.061	0.28	0.037	0.166	0.953	0.808	0.551	0.496	0.618		-0.052	0.315	0.08	0.074	0.293	0.051	0.18	0.965	0.82	0.564	0.508	0.619
0.32	0.262	0.322	0.065	0.014	0.468	-0.022	0.012	0.027	0.004	0.022	-0.027		0.321	0.265	0.33	0.074	0.023	0.477	-0.015	0.02	0.033	0.01	0.028	-0.027		0.321	0.269	0.337	0.081	0.031	0.483	-0.009	0.026	0.039	0.016	0.034	-0.027
RepA1-120h	OD												RepA2-120h	OD												RepA3-120h	OD
0	0.32	-0.003	0.963	0.006	0.064	0.383	0.086	0.517	0.135	0.57	0.493		0	0.321	-0.003	0.964	0.008	0.064	0.384	0.086	0.518	0.136	0.572	0.494		0	0.321	-0.003	0.964	0.009	0.064	0.385	0.086	0.517	0.136	0.572	0.493
0.017	0.078	0.383	0.001	0.624	-0.019	0.598	-0.066	0.472	0.395	0.344	0.567		0.016	0.082	0.391	0.012	0.635	-0.007	0.61	-0.056	0.482	0.407	0.352	0.568		0.016	0.09	0.404	0.027	0.65	0.009	0.624	-0.043	0.496	0.424	0.366	0.569
0.024	-0.015	0.385	0.087	0.652	0.01	0.014	0.443	0.017	0.528	0.289	0.229		0.024	-0.006	0.398	0.099	0.663	0.02	0.025	0.454	0.028	0.541	0.303	0.23		0.024	0.009	0.415	0.114	0.678	0.037	0.042	0.47	0.044	0.558	0.321	0.229
0.605	0.513	0.056	-0.014	0.03	0.513	0.092	0.674	0.443	0.082	0.001	0.511		0.607	0.522	0.068	-0.002	0.043	0.525	0.105	0.686	0.456	0.095	0.018	0.513		0.607	0.537	0.084	0.015	0.061	0.54	0.122	0.701	0.473	0.114	0.039	0.513
-0.001	0.189	0.029	0.595	0.289	0.02	0.704	0.013	0.595	0.11	0.083	0.802		-0.001	0.2	0.042	0.607	0.301	0.033	0.717	0.026	0.607	0.124	0.101	0.803		-0.001	0.217	0.059	0.622	0.319	0.052	0.733	0.043	0.624	0.143	0.124	0.803
0.384	0.007	0.046	0.352	0.066	0.357	0.053	0.11	0.129	0.283	0.03	0.639		0.384	0.018	0.058	0.364	0.08	0.37	0.066	0.123	0.142	0.297	0.044	0.639		0.385	0.034	0.074	0.381	0.099	0.388	0.085	0.142	0.161	0.316	0.063	0.639
-0.055	0.244	0.047	0.039	0.266	0.021	0.285	0.939	1.11	0.632	0.377	0.62		-0.055	0.254	0.058	0.05	0.279	0.035	0.3	0.953	1.122	0.645	0.388	0.621		-0.055	0.269	0.075	0.068	0.298	0.054	0.319	0.971	1.139	0.663	0.402	0.622
0.541	0.477	0.4	0.125	0.004	0.4	-0.016	0.01	0.044	0.006	0.046	-0.013		0.542	0.478	0.401	0.126	0.006	0.401	-0.015	0.011	0.045	0.007	0.047	-0.012		0.543	0.478	0.402	0.127	0.007	0.401	-0.015	0.012	0.046	0.007	0.047	-0.011
RepA1-144h	OD												RepA2-144h	OD												RepA3-144h	OD
0	0.3	0.004	1.011	0.099	0.112	0.487	0.154	0.596	0.164	0.655	0.549		0	0.301	0.005	1.008	0.096	0.108	0.486	0.151	0.598	0.162	0.656	0.55		0	0.301	0.005	1.005	0.09	0.102	0.483	0.146	0.598	0.162	0.656	0.55
0.016	0.188	0.499	0.145	0.774	0.123	0.739	0.045	0.66	0.596	0.493	0.652		0.016	0.188	0.5	0.146	0.775	0.125	0.74	0.046	0.661	0.597	0.492	0.653		0.016	0.186	0.5	0.146	0.776	0.125	0.741	0.045	0.66	0.598	0.49	0.654
0.035	0.123	0.535	0.242	0.818	0.144	0.151	0.644	0.156	0.732	0.415	0.311		0.036	0.125	0.536	0.244	0.82	0.146	0.153	0.647	0.158	0.733	0.414	0.312		0.036	0.124	0.536	0.244	0.82	0.147	0.154	0.647	0.158	0.733	0.412	0.313
0.694	0.638	0.202	0.141	0.193	0.731	0.262	0.89	0.592	0.257	0.174	0.627		0.695	0.64	0.205	0.143	0.195	0.733	0.264	0.893	0.595	0.259	0.174	0.628		0.695	0.64	0.205	0.144	0.196	0.734	0.265	0.893	0.596	0.26	0.174	0.628
-0.002	0.328	0.183	0.812	0.493	0.186	0.857	0.21	0.824	0.304	0.274	0.855		0	0.33	0.185	0.814	0.496	0.188	0.859	0.211	0.826	0.306	0.275	0.857		0	0.33	0.186	0.814	0.496	0.189	0.86	0.212	0.827	0.307	0.274	0.857
0.725	0.165	0.2	0.623	0.241	0.552	0.24	0.294	0.354	0.636	0.184	0.647		0.726	0.167	0.203	0.625	0.244	0.554	0.242	0.296	0.356	0.638	0.184	0.648		0.726	0.167	0.203	0.625	0.244	0.555	0.242	0.297	0.357	0.639	0.184	0.649
-0.042	0.38	0.202	0.199	0.44	0.231	0.543	1.086	1.26	0.924	0.451	0.575		-0.041	0.38	0.205	0.201	0.442	0.233	0.544	1.087	1.262	0.925	0.45	0.577		-0.041	0.379	0.205	0.201	0.442	0.233	0.545	1.088	1.261	0.925	0.448	0.577
0.797	0.567	0.482	0.249	0.06	0.379	0.01	0.024	0.073	0.018	0.067	0.011		0.799	0.568	0.475	0.243	0.055	0.373	0.003	0.024	0.066	0.019	0.068	0.013		0.799	0.568	0.467	0.233	0.046	0.365	0.001	0.024	0.062	0.019	0.068	0.013
RepA1-168h	OD												RepA2-168h	OD												RepA3-168h	OD
0	0.29	0.03	0.979	0.033	0.098	0.497	0.126	0.683	0.21	0.738	0.373		0	0.291	0.03	0.98	0.035	0.099	0.498	0.127	0.685	0.212	0.739	0.376		0	0.29	0.03	0.98	0.034	0.098	0.498	0.127	0.685	0.211	0.739	0.375
0.029	0.113	0.404	0.042	0.683	0.005	0.639	-0.045	0.64	0.552	0.407	0.759		0.029	0.117	0.412	0.053	0.692	0.016	0.649	-0.035	0.65	0.563	0.416	0.759		0.029	0.118	0.418	0.059	0.698	0.023	0.655	-0.029	0.657	0.571	0.421	0.76
0.062	0.007	0.381	0.129	0.735	0.027	0.034	0.63	0.046	0.63	0.296	0.412		0.061	0.016	0.394	0.141	0.745	0.038	0.046	0.641	0.058	0.641	0.307	0.415		0.061	0.022	0.401	0.147	0.752	0.045	0.053	0.647	0.066	0.648	0.314	0.415
0.767	0.524	0.066	0.015	0.05	0.699	0.143	0.856	0.475	0.15	0.047	0.72		0.769	0.533	0.078	0.027	0.063	0.71	0.156	0.867	0.488	0.163	0.06	0.722		0.769	0.539	0.086	0.035	0.071	0.717	0.164	0.874	0.495	0.171	0.069	0.722
0.015	0.211	0.042	0.78	0.446	0.053	0.726	0.115	0.758	0.202	0.146	0.918		0.016	0.222	0.055	0.791	0.458	0.066	0.737	0.128	0.77	0.215	0.16	0.92		0.016	0.229	0.063	0.798	0.465	0.074	0.745	0.136	0.777	0.224	0.169	0.921
0.943	0.049	0.08	0.536	0.095	0.445	0.106	0.161	0.32	0.543	0.078	0.701		0.943	0.059	0.092	0.547	0.108	0.457	0.119	0.174	0.334	0.556	0.09	0.702		0.943	0.066	0.099	0.555	0.116	0.465	0.128	0.182	0.342	0.565	0.098	0.702
-0.009	0.279	0.085	0.081	0.312	0.127	0.455	0.942	1.145	0.795	0.369	0.575		-0.009	0.289	0.097	0.093	0.325	0.14	0.468	0.953	1.157	0.807	0.378	0.576		-0.008	0.295	0.104	0.101	0.333	0.148	0.477	0.961	1.164	0.815	0.383	0.576
0.989	0.672	0.514	0.414	0.054	0.369	0.034	0.051	0.085	0.042	0.098	0.058		0.993	0.672	0.515	0.416	0.055	0.37	0.035	0.052	0.086	0.043	0.099	0.059		0.992	0.672	0.515	0.416	0.055	0.37	0.035	0.052	0.086	0.043	0.1	0.059
RepA1-192h	OD												RepA2-192h	OD												RepA3-192h	OD
0	0.278	0.06	0.983	0.06	0.132	0.562	0.162	0.739	0.268	0.808	0.07		0	0.279	0.059	0.983	0.06	0.132	0.562	0.162	0.739	0.268	0.808	0.07		0	0.279	0.059	0.983	0.06	0.132	0.562	0.162	0.739	0.268	0.809	0.074
0.042	0.144	0.437	0.071	0.703	0.027	0.658	-0.026	0.719	0.625	0.425	0.493		0.042	0.144	0.447	0.083	0.715	0.041	0.669	-0.014	0.73	0.639	0.431	0.49		0.042	0.144	0.451	0.089	0.721	0.048	0.676	-0.007	0.737	0.646	0.433	0.494
0.09	0.027	0.379	0.16	0.766	0.048	0.056	0.739	0.078	0.64	0.309	0.523		0.09	0.037	0.394	0.173	0.779	0.061	0.07	0.752	0.092	0.653	0.322	0.522		0.09	0.043	0.403	0.181	0.786	0.069	0.078	0.759	0.1	0.661	0.328	0.523
0.808	0.536	0.08	0.04	0.073	0.796	0.184	0.962	0.609	0.197	0.08	0.794		0.809	0.547	0.095	0.055	0.09	0.81	0.2	0.975	0.624	0.213	0.095	0.794		0.809	0.553	0.103	0.063	0.099	0.817	0.209	0.983	0.633	0.222	0.104	0.794
0.041	0.273	0.061	0.878	0.567	0.085	0.742	0.189	0.7	0.253	0.185	1.032		0.041	0.287	0.076	0.891	0.581	0.101	0.755	0.205	0.715	0.269	0.202	1.032		0.041	0.294	0.085	0.899	0.589	0.111	0.765	0.214	0.724	0.279	0.212	1.033
1.081	0.079	0.108	0.549	0.121	0.498	0.144	0.197	0.447	0.613	0.11	0.851		1.081	0.091	0.123	0.564	0.137	0.513	0.161	0.213	0.463	0.629	0.125	0.851		1.081	0.098	0.131	0.572	0.146	0.522	0.17	0.223	0.472	0.637	0.133	0.85
0.02	0.361	0.115	0.113	0.35	0.182	0.529	0.943	1.158	0.796	0.404	0.579		0.02	0.372	0.129	0.127	0.366	0.199	0.545	0.958	1.172	0.811	0.414	0.58		0.02	0.378	0.136	0.135	0.375	0.208	0.554	0.966	1.179	0.819	0.42	0.579
0.624	0.797	0.585	0.735	0.089	0.376	0.069	0.085	0.111	0.065	0.129	0.075		0.626	0.798	0.586	0.736	0.089	0.375	0.069	0.085	0.111	0.066	0.129	0.076		0.628	0.798	0.585	0.736	0.089	0.375	0.069	0.085	0.111	0.066	0.129	0.075

## Sheet: G16B
RepB1-0h	OD												RepB2-0h	OD												RepB3-0h	OD
0	0.05	0.03	0.058	0.012	0.016	0.015	0.004	0.006	0.011	0.008	0.031		0	0.05	0.028	0.057	0.012	0.017	0.016	0.004	0.006	0.008	0.008	0.031		0	0.049	0.028	0.058	0.012	0.017	0.015	0.004	0.006	0.008	0.007	0.031
-0.009	-0.004	0.118	0.004	-0.034	-0.009	-0.029	-0.027	-0.034	-0.034	0.011	0.002		-0.009	-0.004	0.118	0.004	-0.033	-0.009	-0.029	-0.027	-0.034	-0.034	0.011	0.002		-0.009	-0.004	0.118	0.005	-0.033	-0.009	-0.029	-0.027	-0.034	-0.034	0.012	0.002
-0.024	-0.003	0.004	0.013	0.186	-0.01	-0.024	-0.033	-0.022	-0.02	0	-0.005		-0.024	-0.004	0.003	0.013	0.185	-0.01	-0.024	-0.033	-0.022	-0.021	0	-0.005		-0.024	-0.004	0.003	0.013	0.184	-0.01	-0.024	-0.033	-0.022	-0.022	0	-0.004
-0.04	-0.02	-0.008	-0.03	-0.019	0.009	0	-0.036	-0.033	-0.024	-0.015	-0.017		-0.04	-0.02	-0.008	-0.03	-0.019	0.009	0	-0.036	-0.033	-0.024	-0.015	-0.017		-0.04	-0.02	-0.008	-0.03	-0.019	0.008	0	-0.036	-0.033	-0.024	-0.015	-0.017
0	0.036	0.054	0.028	0.077	0.057	0.02	0.045	0.005	0.047	0.055	0.003		0	0.036	0.053	0.028	0.077	0.058	0.02	0.043	0.005	0.046	0.055	0.003		0	0.036	0.052	0.028	0.076	0.057	0.02	0.043	0.004	0.045	0.055	0.004
-0.03	-0.016	-0.008	-0.003	-0.016	0.001	-0.019	-0.016	-0.023	-0.021	-0.021	-0.019		-0.03	-0.016	-0.008	-0.003	-0.016	0.001	-0.019	-0.016	-0.024	-0.021	-0.021	-0.019		-0.03	-0.016	-0.008	-0.003	-0.016	0.001	-0.019	-0.016	-0.024	-0.021	-0.02	-0.019
-0.039	0.355	0.002	0.02	-0.023	0.005	-0.02	-0.009	-0.011	-0.004	-0.013	0		-0.039	0.354	0.002	0.02	-0.023	0.005	-0.019	-0.009	-0.01	-0.004	-0.013	0.001		-0.039	0.354	0.002	0.019	-0.023	0.005	-0.019	-0.009	-0.01	-0.003	-0.013	0.001
-0.04	-0.017	0.493	-0.032	-0.001	0.008	0.016	0.001	-0.006	1.3	-0.013	-0.008		-0.04	-0.017	0.495	-0.032	-0.001	0.009	0.015	0.002	-0.005	1.299	-0.013	-0.008		-0.04	-0.016	0.497	-0.032	-0.001	0.009	0.015	0.002	-0.005	1.296	-0.013	-0.008
RepB1-24h	OD												RepB2-24h	OD												RepB3-24h	OD
0	0.096	0.019	0.068	0.009	0.036	0.046	0.014	0.047	0.041	0.046	0.114		0	0.088	0.018	0.059	0.01	0.036	0.045	0.015	0.048	0.042	0.047	0.115		0	0.088	0.018	0.059	0.01	0.036	0.045	0.015	0.049	0.042	0.047	0.115
0.024	0.1	0.206	0.07	0.093	0.063	0.083	0.059	0.087	0.067	0.043	0.089		0.024	0.103	0.208	0.073	0.097	0.067	0.087	0.062	0.091	0.07	0.043	0.09		0.024	0.103	0.208	0.074	0.098	0.067	0.087	0.063	0.092	0.071	0.041	0.09
0.006	0.062	0.088	0.099	0.124	0.092	0.052	0.037	0.064	0.037	0.094	0.06		0.006	0.064	0.092	0.103	0.128	0.096	0.056	0.041	0.068	0.041	0.096	0.061		0.006	0.063	0.093	0.104	0.129	0.097	0.057	0.043	0.07	0.042	0.096	0.061
0.005	0.134	0.046	0.07	0.045	0.086	0.096	0.067	0.076	0.057	0.035	0.017		0.006	0.138	0.051	0.074	0.049	0.091	0.1	0.071	0.081	0.061	0.037	0.018		0.007	0.138	0.052	0.075	0.051	0.092	0.101	0.073	0.082	0.063	0.037	0.018
-0.016	0.122	0.106	0.118	0.139	0.113	0.187	0.094	0.143	0.1	0.112	0.066		-0.015	0.127	0.11	0.122	0.143	0.117	0.192	0.097	0.148	0.105	0.114	0.067		-0.015	0.127	0.111	0.124	0.144	0.118	0.193	0.099	0.149	0.106	0.114	0.067
-0.004	0.021	0.06	0.076	0.112	0.058	0.063	0.062	0.057	0.045	0.036	0.019		-0.004	0.022	0.064	0.079	0.115	0.062	0.067	0.066	0.06	0.049	0.038	0.02		-0.004	0.021	0.065	0.08	0.115	0.062	0.068	0.067	0.061	0.05	0.037	0.02
-0.024	0.363	0.077	0.1	0.013	0.088	0.077	0.102	0.093	0.082	0.053	0.009		-0.024	0.362	0.082	0.104	0.018	0.092	0.081	0.106	0.097	0.086	0.053	0.01		-0.024	0.358	0.082	0.104	0.018	0.092	0.081	0.107	0.098	0.087	0.052	0.01
-0.001	0.004	0.455	-0.011	0.02	0.055	0.012	0.056	0.018	0.3	0.001	-0.005		0	-0.005	0.447	-0.021	0.011	0.048	0.006	0.048	0.011	0.295	0.002	-0.004		0	-0.01	0.436	-0.022	0.004	0.046	0.007	0.044	0.011	0.294	0.003	-0.004
RepB1-48h	OD												RepB2-48h	OD												RepB3-48h	OD
0	0.363	0.069	0.292	0.051	0.114	0.214	0.099	0.258	0.158	0.245	0.38		0	0.36	0.071	0.3	0.055	0.12	0.219	0.104	0.263	0.163	0.251	0.376		0	0.359	0.072	0.303	0.056	0.122	0.221	0.106	0.266	0.167	0.254	0.376
0.022	0.229	0.482	0.119	0.363	0.11	0.296	0.078	0.354	0.226	0.15	0.403		0.022	0.24	0.492	0.131	0.375	0.119	0.306	0.085	0.364	0.238	0.16	0.407		0.022	0.246	0.499	0.137	0.381	0.125	0.312	0.09	0.369	0.244	0.165	0.407
0.023	0.102	0.425	0.211	0.345	0.122	0.083	0.158	0.112	0.196	0.402	0.356		0.02	0.111	0.436	0.221	0.354	0.131	0.092	0.166	0.121	0.205	0.412	0.36		0.018	0.117	0.443	0.226	0.36	0.136	0.097	0.172	0.127	0.211	0.418	0.359
0.229	0.392	0.119	0.098	0.082	0.276	0.171	0.327	0.378	0.139	0.071	0.176		0.224	0.404	0.13	0.108	0.093	0.286	0.18	0.335	0.386	0.148	0.082	0.178		0.221	0.41	0.136	0.114	0.099	0.292	0.186	0.341	0.391	0.154	0.089	0.174
-0.002	0.268	0.148	0.312	0.249	0.157	0.544	0.11	0.475	0.15	0.181	0.343		-0.007	0.28	0.158	0.322	0.259	0.167	0.552	0.116	0.483	0.16	0.192	0.345		-0.01	0.287	0.164	0.327	0.265	0.174	0.558	0.121	0.488	0.166	0.199	0.343
0.065	0.071	0.108	0.19	0.184	0.147	0.094	0.094	0.123	0.081	0.068	0.601		0.06	0.079	0.118	0.202	0.194	0.158	0.105	0.106	0.134	0.091	0.08	0.603		0.058	0.085	0.124	0.209	0.2	0.165	0.111	0.113	0.14	0.097	0.087	0.601
-0.017	0.359	0.137	0.175	0.024	0.117	0.114	0.375	0.314	0.178	0.332	0.23		-0.022	0.368	0.148	0.186	0.036	0.13	0.129	0.388	0.327	0.192	0.344	0.231		-0.023	0.374	0.154	0.193	0.044	0.138	0.137	0.396	0.334	0.199	0.352	0.229
0.055	0.088	0.26	0.056	0.07	0.185	0.054	0.106	0.043	0.304	0.025	-0.006		0.052	0.092	0.265	0.058	0.076	0.191	0.058	0.112	0.048	0.31	0.029	-0.007		0.052	0.093	0.265	0.058	0.079	0.193	0.059	0.113	0.049	0.312	0.03	-0.007
RepB1-72h	OD												RepB2-72h	OD												RepB3-72h	OD
0	0.537	0.086	0.838	0.071	0.142	0.401	0.14	0.493	0.186	0.472	0.558		0	0.537	0.089	0.844	0.076	0.149	0.406	0.145	0.498	0.193	0.478	0.556		0	0.536	0.091	0.847	0.078	0.152	0.409	0.148	0.502	0.196	0.482	0.552
0.021	0.286	0.576	0.142	0.664	0.122	0.56	0.102	0.567	0.367	0.34	0.56		0.017	0.295	0.585	0.152	0.674	0.132	0.569	0.109	0.575	0.376	0.348	0.563		0.015	0.301	0.591	0.158	0.68	0.139	0.575	0.114	0.58	0.382	0.354	0.563
0.056	0.127	0.628	0.268	0.614	0.141	0.1	0.362	0.137	0.451	0.543	0.45		0.053	0.137	0.637	0.278	0.623	0.151	0.109	0.37	0.146	0.459	0.551	0.454		0.051	0.143	0.643	0.285	0.628	0.157	0.116	0.376	0.152	0.465	0.557	0.454
0.499	0.541	0.142	0.116	0.101	0.497	0.229	0.633	0.677	0.131	0.1	0.433		0.498	0.551	0.152	0.126	0.111	0.506	0.238	0.641	0.685	0.14	0.109	0.437		0.496	0.557	0.159	0.132	0.118	0.512	0.245	0.647	0.691	0.146	0.116	0.438
0.03	0.375	0.156	0.534	0.345	0.168	0.832	0.112	0.604	0.199	0.229	0.717		0.027	0.386	0.165	0.543	0.356	0.178	0.841	0.12	0.614	0.209	0.238	0.715		0.024	0.392	0.172	0.549	0.364	0.186	0.847	0.126	0.621	0.216	0.244	0.713
0.191	0.103	0.132	0.35	0.209	0.314	0.126	0.13	0.176	0.118	0.098	0.956		0.189	0.111	0.141	0.362	0.22	0.325	0.136	0.141	0.185	0.127	0.105	0.957		0.186	0.117	0.148	0.37	0.228	0.332	0.144	0.148	0.192	0.134	0.112	0.958
-0.006	0.439	0.167	0.227	0.044	0.142	0.214	1.139	0.638	0.521	0.635	0.687		-0.009	0.448	0.178	0.238	0.056	0.155	0.228	1.15	0.65	0.533	0.646	0.687		-0.013	0.454	0.185	0.246	0.064	0.162	0.237	1.159	0.658	0.542	0.654	0.687
0.199	0.231	0.325	0.105	0.089	0.473	0.069	0.126	0.063	0.275	0.045	-0.014		0.194	0.235	0.329	0.108	0.095	0.479	0.072	0.13	0.067	0.283	0.045	-0.014		0.193	0.236	0.33	0.107	0.097	0.48	0.071	0.131	0.068	0.283	0.044	-0.013
RepB1-96h	OD												RepB2-96h	OD												RepB3-96h	OD
0	0.586	0.133	1.08	0.118	0.2	0.486	0.194	0.603	0.242	0.615	0.58		0	0.582	0.13	1.078	0.117	0.2	0.486	0.194	0.604	0.242	0.615	0.578		0	0.349	0	0.965	0.053	0.072	0.35	0.109	0.421	0.131	0.453	0.465
0.015	0.373	0.644	0.231	0.816	0.203	0.703	0.173	0.658	0.496	0.47	0.594		0.012	0.374	0.645	0.232	0.818	0.205	0.704	0.173	0.659	0.497	0.471	0.591		0.018	0.12	0.446	0.052	0.6	0.05	0.598	-0.011	0.483	0.373	0.343	0.491
0.083	0.206	0.702	0.375	0.764	0.223	0.183	0.498	0.221	0.628	0.604	0.482		0.075	0.207	0.705	0.377	0.766	0.226	0.186	0.5	0.222	0.63	0.605	0.48		0.014	0.048	0.476	0.128	0.614	0.072	0.083	0.403	0.08	0.452	0.392	0.242
0.601	0.616	0.229	0.202	0.186	0.654	0.324	0.795	0.758	0.215	0.182	0.564		0.597	0.618	0.231	0.204	0.189	0.655	0.326	0.797	0.758	0.217	0.184	0.562		0.512	0.59	0.12	0.051	0.099	0.46	0.146	0.623	0.516	0.159	0.1	0.366
0.056	0.451	0.24	0.696	0.46	0.253	0.958	0.189	0.745	0.302	0.33	0.901		0.047	0.453	0.241	0.698	0.462	0.256	0.959	0.191	0.747	0.305	0.332	0.899		0.005	0.276	0.103	0.532	0.3	0.092	0.757	0.069	0.559	0.152	0.169	0.738
0.298	0.193	0.227	0.516	0.314	0.504	0.231	0.237	0.291	0.23	0.207	0.988		0.29	0.194	0.228	0.518	0.316	0.506	0.233	0.24	0.293	0.231	0.208	0.986		0.167	0.07	0.103	0.306	0.146	0.327	0.114	0.163	0.155	0.144	0.104	0.661
0.007	0.545	0.262	0.337	0.138	0.247	0.366	1.277	0.92	0.83	0.799	0.861		-0.002	0.545	0.263	0.338	0.14	0.249	0.368	1.279	0.923	0.831	0.801	0.859		-0.053	0.342	0.106	0.1	0.323	0.081	0.211	0.994	0.848	0.595	0.534	0.617
0.264	0.348	0.425	0.156	0.138	0.661	0.12	0.184	0.124	0.32	0.11	0.001		0.263	0.345	0.422	0.152	0.136	0.658	0.115	0.181	0.121	0.317	0.106	0		0.321	0.27	0.345	0.09	0.045	0.493	-0.001	0.035	0.05	0.026	0.044	-0.028
RepB1-120h	OD												RepB2-120h	OD												RepB3-120h	OD
0	0.507	0.051	1.053	0.029	0.115	0.471	0.127	0.622	0.158	0.652	0.627		0	0.506	0.052	1.057	0.031	0.118	0.475	0.13	0.625	0.162	0.655	0.628		0	0.506	0.051	1.058	0.03	0.119	0.476	0.131	0.626	0.163	0.656	0.629
0.004	0.285	0.528	0.115	0.802	0.074	0.673	0.072	0.604	0.479	0.441	0.542		0.005	0.292	0.535	0.123	0.808	0.081	0.68	0.078	0.61	0.486	0.448	0.542		0.005	0.296	0.54	0.129	0.814	0.087	0.685	0.082	0.615	0.492	0.453	0.541
0.043	0.088	0.575	0.284	0.762	0.103	0.07	0.49	0.109	0.689	0.481	0.448		0.044	0.095	0.582	0.292	0.768	0.11	0.078	0.496	0.116	0.695	0.487	0.448		0.044	0.101	0.588	0.297	0.773	0.116	0.083	0.501	0.122	0.699	0.492	0.446
0.667	0.502	0.108	0.089	0.068	0.682	0.234	0.835	0.664	0.124	0.062	0.7		0.668	0.509	0.116	0.097	0.076	0.689	0.241	0.842	0.67	0.131	0.069	0.701		0.668	0.514	0.122	0.103	0.082	0.694	0.247	0.847	0.675	0.137	0.075	0.701
0.007	0.319	0.12	0.742	0.398	0.134	0.894	0.09	0.782	0.217	0.218	0.957		0.008	0.327	0.128	0.749	0.406	0.142	0.901	0.097	0.79	0.225	0.226	0.957		0.008	0.333	0.133	0.754	0.413	0.148	0.906	0.102	0.795	0.231	0.232	0.957
0.604	0.09	0.116	0.458	0.177	0.535	0.12	0.129	0.213	0.19	0.093	0.879		0.604	0.097	0.124	0.467	0.186	0.543	0.129	0.138	0.221	0.197	0.101	0.881		0.604	0.102	0.13	0.474	0.192	0.549	0.135	0.144	0.227	0.203	0.107	0.881
-0.024	0.459	0.153	0.225	0.012	0.144	0.318	1.215	1.253	0.806	0.582	0.708		-0.023	0.464	0.161	0.234	0.021	0.153	0.328	1.224	1.261	0.814	0.59	0.709		-0.023	0.468	0.167	0.24	0.027	0.16	0.336	1.228	1.266	0.82	0.596	0.71
0.383	0.476	0.447	0.118	0.061	0.587	0.037	0.098	0.058	0.227	0.073	0.031		0.384	0.477	0.449	0.119	0.064	0.589	0.039	0.101	0.061	0.229	0.074	0.033		0.384	0.476	0.447	0.118	0.064	0.589	0.037	0.101	0.061	0.229	0.072	0.033
RepB1-144h	OD												RepB2-144h	OD												RepB3-144h	OD
0	0.521	0.128	1.172	0.105	0.201	0.577	0.213	0.771	0.255	0.802	0.699		0	0.516	0.124	1.172	0.103	0.199	0.575	0.211	0.771	0.254	0.802	0.699		0	0.512	0.121	1.171	0.1	0.197	0.574	0.21	0.77	0.254	0.801	0.7
0.006	0.424	0.649	0.264	0.946	0.207	0.809	0.162	0.781	0.686	0.597	0.657		0.005	0.422	0.649	0.264	0.947	0.208	0.809	0.162	0.782	0.687	0.597	0.654		0.005	0.422	0.649	0.265	0.947	0.208	0.809	0.162	0.782	0.687	0.598	0.645
0.075	0.222	0.699	0.445	0.896	0.236	0.202	0.664	0.246	0.858	0.587	0.538		0.068	0.221	0.699	0.445	0.897	0.237	0.203	0.665	0.246	0.859	0.587	0.536		0.065	0.22	0.699	0.445	0.897	0.237	0.203	0.666	0.247	0.859	0.588	0.532
0.78	0.616	0.239	0.231	0.202	0.89	0.391	1.041	0.799	0.29	0.204	0.901		0.776	0.618	0.24	0.232	0.203	0.891	0.392	1.042	0.8	0.291	0.205	0.899		0.773	0.618	0.24	0.232	0.203	0.892	0.393	1.043	0.801	0.292	0.206	0.896
0.022	0.438	0.256	0.968	0.586	0.281	1.017	0.225	1.017	0.378	0.372	1.071		0.017	0.438	0.255	0.968	0.587	0.282	1.018	0.226	1.018	0.379	0.373	1.069		0.014	0.439	0.256	0.969	0.588	0.282	1.019	0.227	1.018	0.38	0.373	1.065
0.92	0.235	0.261	0.606	0.335	0.74	0.294	0.29	0.377	0.578	0.246	0.894		0.916	0.235	0.262	0.607	0.337	0.742	0.296	0.292	0.378	0.58	0.247	0.892		0.911	0.235	0.262	0.607	0.337	0.742	0.296	0.292	0.379	0.58	0.247	0.89
-0.002	0.572	0.298	0.387	0.202	0.353	0.671	1.355	1.44	1.045	0.717	0.663		-0.005	0.57	0.298	0.387	0.203	0.354	0.672	1.356	1.441	1.047	0.718	0.663		-0.007	0.568	0.298	0.387	0.204	0.354	0.672	1.355	1.441	1.047	0.718	0.663
0.471	0.618	0.573	0.234	0.161	0.642	0.114	0.179	0.147	0.258	0.129	0.088		0.471	0.614	0.569	0.229	0.158	0.64	0.11	0.177	0.144	0.258	0.126	0.088		0.471	0.61	0.565	0.226	0.155	0.636	0.106	0.173	0.141	0.255	0.122	0.088
RepB1-168h	OD												RepB2-168h	OD												RepB3-168h	OD
0	0.401	-0.008	1.05	-0.029	0.072	0.49	0.092	0.698	0.133	0.745	0.705		0	0.4	-0.012	1.051	-0.031	0.072	0.491	0.093	0.699	0.133	0.745	0.705		0	0.4	-0.016	1.051	-0.034	0.071	0.491	0.093	0.699	0.132	0.744	0.705
-0.063	0.252	0.467	0.061	0.773	-0.001	0.628	-0.006	0.674	0.568	0.443	0.618		-0.063	0.256	0.472	0.067	0.779	0.005	0.634	0	0.679	0.574	0.448	0.618		-0.064	0.258	0.475	0.072	0.783	0.009	0.637	0.004	0.683	0.578	0.452	0.618
0.009	0.013	0.487	0.259	0.727	0.033	0.006	0.562	0.062	0.684	0.398	0.491		0.009	0.019	0.493	0.265	0.733	0.04	0.013	0.568	0.069	0.69	0.404	0.49		0.009	0.022	0.497	0.27	0.737	0.044	0.017	0.572	0.073	0.694	0.409	0.49
0.745	0.424	0.026	0.03	-0.001	0.8	0.219	0.948	0.672	0.128	0.015	0.957		0.745	0.43	0.033	0.036	0.005	0.806	0.226	0.954	0.678	0.135	0.021	0.957		0.745	0.433	0.037	0.041	0.01	0.81	0.23	0.958	0.682	0.139	0.026	0.958
-0.043	0.277	0.047	0.892	0.461	0.078	0.84	0.041	0.924	0.199	0.187	1.046		-0.043	0.284	0.054	0.898	0.467	0.086	0.845	0.048	0.929	0.206	0.194	1.046		-0.043	0.288	0.058	0.902	0.472	0.09	0.848	0.052	0.933	0.21	0.198	1.046
1.059	0.047	0.066	0.387	0.118	0.588	0.099	0.095	0.198	0.544	0.063	0.921		1.059	0.052	0.073	0.394	0.125	0.595	0.106	0.103	0.204	0.551	0.069	0.921		1.059	0.055	0.078	0.399	0.13	0.599	0.111	0.107	0.209	0.556	0.073	0.921
-0.052	0.291	0.103	0.194	0.099	0.181	0.504	1.174	1.286	0.966	0.546	0.566		-0.052	0.294	0.11	0.2	0.108	0.189	0.512	1.18	1.292	0.972	0.551	0.566		-0.052	0.294	0.114	0.204	0.113	0.194	0.517	1.182	1.295	0.977	0.554	0.566
0.425	0.567	0.497	0.196	0.028	0.528	0.007	0.059	0.029	0.132	0.055	0.101		0.425	0.566	0.494	0.192	0.027	0.527	0.004	0.058	0.029	0.131	0.055	0.1		0.425	0.565	0.492	0.19	0.026	0.525	0.002	0.056	0.028	0.129	0.055	0.101
RepB1-192h	OD												RepB2-192h	OD												RepB3-192h	OD
0	0.428	0.061	1.109	0.039	0.155	0.588	0.176	0.799	0.223	0.833	0.762		0	0.428	0.056	1.108	0.036	0.154	0.588	0.176	0.799	0.222	0.832	0.762		0	0.428	0.05	1.107	0.032	0.152	0.587	0.174	0.798	0.22	0.83	0.762
-0.021	0.337	0.551	0.145	0.852	0.07	0.699	0.075	0.791	0.698	0.517	0.75		-0.022	0.338	0.554	0.148	0.855	0.073	0.702	0.078	0.795	0.701	0.52	0.748		-0.022	0.338	0.556	0.151	0.857	0.076	0.705	0.081	0.797	0.704	0.523	0.748
0.079	0.082	0.545	0.352	0.788	0.104	0.078	0.702	0.148	0.743	0.457	0.596		0.079	0.084	0.548	0.356	0.791	0.107	0.082	0.705	0.152	0.747	0.461	0.595		0.079	0.086	0.551	0.359	0.794	0.11	0.085	0.708	0.155	0.749	0.464	0.595
0.769	0.487	0.09	0.106	0.073	0.953	0.319	1.097	0.933	0.232	0.093	1.091		0.769	0.49	0.094	0.109	0.077	0.956	0.323	1.1	0.936	0.236	0.097	1.091		0.769	0.492	0.097	0.112	0.08	0.959	0.326	1.103	0.939	0.239	0.1	1.091
0.024	0.367	0.118	1.045	0.615	0.159	0.901	0.16	0.896	0.29	0.276	1.179		0.024	0.37	0.122	1.048	0.619	0.163	0.904	0.164	0.898	0.294	0.28	1.179		0.024	0.372	0.125	1.051	0.622	0.166	0.906	0.168	0.902	0.298	0.284	1.179
1.235	0.128	0.147	0.457	0.193	0.711	0.191	0.177	0.285	0.658	0.141	1.203		1.235	0.13	0.15	0.461	0.198	0.715	0.196	0.182	0.289	0.662	0.145	1.202		1.235	0.131	0.153	0.464	0.201	0.718	0.2	0.186	0.293	0.666	0.148	1.201
0.015	0.392	0.184	0.279	0.249	0.298	0.637	1.223	1.338	0.992	0.639	0.583		0.015	0.391	0.187	0.282	0.254	0.302	0.641	1.225	1.342	0.995	0.641	0.583		0.015	0.389	0.19	0.285	0.258	0.305	0.645	1.228	1.343	0.999	0.642	0.583
0.355	0.689	0.591	0.39	0.1	0.589	0.082	0.13	0.093	0.174	0.119	0.122		0.356	0.689	0.587	0.385	0.098	0.587	0.079	0.128	0.092	0.171	0.12	0.122		0.356	0.689	0.585	0.382	0.095	0.584	0.077	0.125	0.09	0.169	0.12	0.122

## Sheet: G17A
RepA1-0h	OD												RepA2-0h	OD												RepA3-0h	OD
0	0.027	0.004	-0.002	0.04	-0.001	0	0.002	0.004	0.023	0.037	0.011		0	0.027	0.005	-0.002	0.039	0	0.001	0.003	0.005	0.022	0.038	0.012		0	0.027	0.006	-0.002	0.038	0	0.001	0.003	0.005	0.021	0.038	0.013
-0.02	0.418	0.068	-0.031	-0.038	-0.038	-0.042	-0.031	-0.025	0.01	-0.004	-0.021		-0.019	0.416	0.069	-0.031	-0.037	-0.038	-0.041	-0.03	-0.024	0.009	-0.004	-0.02		-0.018	0.414	0.069	-0.031	-0.038	-0.037	-0.041	-0.03	-0.024	0.009	-0.004	-0.02
-0.012	-0.006	-0.012	-0.015	-0.014	-0.016	-0.019	-0.022	-0.024	0.015	-0.012	-0.002		-0.011	-0.006	-0.012	-0.015	-0.013	-0.015	-0.018	-0.022	-0.024	0.014	-0.012	-0.002		-0.012	-0.006	-0.012	-0.015	-0.014	-0.015	-0.018	-0.022	-0.02	0.014	-0.012	-0.003
-0.025	-0.024	0.006	-0.018	-0.013	-0.024	-0.026	-0.025	-0.026	-0.014	-0.006	-0.003		-0.024	-0.023	0.007	-0.018	-0.013	-0.023	-0.025	-0.024	-0.025	-0.013	-0.005	-0.003		-0.025	-0.023	0.007	-0.018	-0.013	-0.024	-0.024	-0.014	-0.026	-0.013	-0.005	-0.003
-0.015	-0.016	-0.017	-0.008	-0.002	-0.003	-0.019	-0.015	-0.007	-0.009	-0.007	0.016		-0.015	-0.015	-0.016	-0.008	-0.001	-0.002	-0.017	-0.013	-0.006	-0.009	-0.004	0.017		-0.014	-0.014	-0.017	-0.008	-0.001	-0.001	-0.017	-0.013	0.001	-0.009	-0.002	0.016
-0.027	-0.026	-0.026	-0.011	-0.01	-0.011	-0.022	-0.013	-0.028	-0.019	-0.019	-0.017		-0.026	-0.025	-0.025	-0.01	-0.01	-0.011	-0.021	-0.012	-0.027	-0.019	-0.018	-0.016		-0.027	-0.025	-0.026	-0.011	-0.011	-0.012	-0.021	-0.009	-0.027	-0.019	-0.018	-0.016
-0.022	0.323	-0.01	-0.002	-0.012	-0.008	-0.018	-0.025	-0.018	-0.012	-0.012	-0.017		-0.022	0.32	-0.01	-0.002	-0.011	-0.007	-0.017	-0.024	-0.017	-0.011	-0.011	-0.017		-0.022	0.317	-0.01	-0.002	-0.011	-0.007	-0.017	-0.024	-0.016	-0.012	-0.012	-0.017
-0.027	-0.024	0.043	-0.026	-0.023	-0.025	-0.021	-0.031	-0.025	0.154	-0.025	-0.021		-0.026	-0.022	0.044	-0.025	-0.022	-0.024	-0.02	-0.03	-0.024	0.152	-0.025	-0.02		-0.026	-0.022	0.044	-0.025	-0.022	-0.023	-0.02	-0.029	-0.024	0.149	-0.025	-0.02
RepA1-24h	OD												RepA2-24h	OD												RepA3-24h	OD
0	0.042	0.024	0.014	0.029	0.032	0.03	0.015	0.031	0.03	0.029	0.082		0	0.043	0.028	0.02	0.037	0.04	0.037	0.023	0.039	0.034	0.031	0.084		0	0.043	0.029	0.022	0.04	0.043	0.041	0.026	0.042	0.034	0.03	0.085
0.053	0.06	0.174	0.019	0.058	-0.002	0.038	-0.059	0.044	0.022	-0.03	0.083		0.055	0.074	0.185	0.031	0.071	0.009	0.05	-0.047	0.057	0.033	-0.018	0.085		0.055	0.081	0.191	0.037	0.078	0.015	0.056	-0.042	0.063	0.038	-0.013	0.086
0.007	-0.015	0.057	0.031	0.085	0.026	0.025	0.005	0.009	0.007	0.049	0.049		0.008	-0.004	0.068	0.042	0.097	0.038	0.037	0.017	0.021	0.019	0.06	0.051		0.008	0.002	0.074	0.047	0.103	0.044	0.043	0.022	0.027	0.024	0.065	0.052
0.023	0.087	0.06	0.009	0.02	0.028	0.023	0.045	0.023	0.032	0.019	-0.001		0.025	0.099	0.073	0.022	0.034	0.04	0.035	0.058	0.036	0.044	0.031	0.001		0.025	0.105	0.079	0.028	0.04	0.046	0.04	0.064	0.041	0.049	0.036	0.001
-0.046	0.034	0.028	0.062	0.05	0.042	0.115	-0.005	0.121	0.017	0.03	0.075		-0.045	0.048	0.041	0.075	0.063	0.056	0.128	0.007	0.133	0.029	0.041	0.077		-0.045	0.054	0.048	0.082	0.07	0.062	0.134	0.012	0.138	0.035	0.047	0.078
-0.027	-0.058	-0.003	0.008	0.055	-0.012	0.021	0.045	0.017	0.005	0.001	0.009		-0.026	-0.046	0.011	0.022	0.07	0.002	0.034	0.059	0.03	0.018	0.013	0.011		-0.026	-0.04	0.018	0.03	0.078	0.008	0.041	0.065	0.036	0.024	0.018	0.012
-0.022	0.199	0.007	0.013	-0.046	0.016	0.032	0.036	0.021	0.017	0.008	-0.008		-0.021	0.211	0.021	0.027	-0.03	0.032	0.047	0.05	0.034	0.03	0.019	-0.006		-0.02	0.217	0.028	0.034	-0.022	0.039	0.054	0.056	0.04	0.036	0.024	-0.006
0.002	0.006	0.038	0.005	-0.043	0.008	-0.02	-0.019	-0.017	-0.017	-0.019	-0.03		0.003	0.013	0.046	0.015	-0.033	0.015	-0.015	-0.013	-0.013	-0.012	-0.017	-0.028		0.004	0.016	0.05	0.021	-0.028	0.017	-0.014	-0.011	-0.011	-0.011	-0.016	-0.028
RepA1-48h	OD												RepA2-48h	OD												RepA3-48h	OD
0	0.243	0.024	0.162	0.029	0.058	0.14	0.051	0.178	0.105	0.171	0.341		0	0.241	0.038	0.178	0.046	0.073	0.154	0.064	0.191	0.118	0.18	0.34		0	0.242	0.05	0.19	0.06	0.086	0.165	0.075	0.203	0.128	0.188	0.341
0.046	0.054	0.361	0.048	0.274	0.028	0.231	-0.066	0.248	0.145	0.09	0.333		0.044	0.072	0.377	0.064	0.289	0.046	0.246	-0.054	0.264	0.16	0.104	0.334		0.044	0.086	0.39	0.077	0.301	0.06	0.258	-0.044	0.277	0.172	0.114	0.338
0.013	0.012	0.26	0.083	0.262	0.035	0.032	0.108	0.032	0.12	0.254	0.264		0.011	0.03	0.279	0.101	0.278	0.05	0.047	0.121	0.046	0.135	0.269	0.269		0.015	0.045	0.293	0.115	0.291	0.063	0.06	0.132	0.058	0.147	0.281	0.274
0.244	0.359	0.103	0.019	0.031	0.162	0.066	0.276	0.226	0.115	0.025	0.126		0.246	0.378	0.121	0.037	0.049	0.178	0.083	0.291	0.24	0.129	0.042	0.13		0.253	0.393	0.136	0.051	0.063	0.191	0.096	0.303	0.252	0.142	0.055	0.135
0.002	0.142	0.044	0.22	0.158	0.055	0.317	0.009	0.344	0.031	0.071	0.254		0.002	0.164	0.062	0.237	0.173	0.072	0.335	0.023	0.359	0.047	0.089	0.261		0.006	0.18	0.077	0.25	0.186	0.087	0.349	0.033	0.372	0.06	0.103	0.267
0.011	-0.015	0.028	0.099	0.154	0.048	0.033	0.067	0.045	0.031	0.014	0.341		0.013	0.004	0.045	0.119	0.175	0.067	0.054	0.087	0.062	0.048	0.031	0.345		0.019	0.018	0.059	0.134	0.192	0.082	0.071	0.102	0.076	0.062	0.044	0.35
-0.023	0.156	0.04	0.038	0.007	0.022	0.028	0.257	0.136	0.107	0.166	0.168		-0.021	0.178	0.058	0.058	0.025	0.042	0.049	0.282	0.158	0.127	0.186	0.172		-0.015	0.194	0.073	0.074	0.04	0.057	0.066	0.301	0.175	0.143	0.201	0.176
0.046	0.061	0.123	0.047	0.012	0.133	-0.003	0.01	-0.015	0.014	-0.013	-0.024		0.045	0.079	0.143	0.068	0.033	0.149	0.009	0.025	-0.002	0.028	-0.005	-0.025		0.046	0.093	0.158	0.084	0.049	0.163	0.02	0.038	0.01	0.04	0.004	-0.024
RepA1-72h	OD												RepA2-72h	OD												RepA3-72h	OD
0	0.324	0.064	0.601	0.078	0.105	0.319	0.11	0.421	0.155	0.37	0.538		0	0.326	0.073	0.612	0.09	0.117	0.33	0.121	0.432	0.164	0.377	0.541		0	0.326	0.078	0.617	0.096	0.124	0.336	0.127	0.438	0.169	0.381	0.544
0.03	0.127	0.513	0.093	0.543	0.069	0.505	-0.022	0.521	0.294	0.29	0.526		0.03	0.138	0.524	0.105	0.555	0.081	0.515	-0.013	0.532	0.305	0.301	0.533		0.03	0.144	0.53	0.111	0.561	0.088	0.521	-0.007	0.539	0.312	0.309	0.535
0.034	0.089	0.539	0.18	0.54	0.089	0.083	0.279	0.09	0.351	0.426	0.39		0.036	0.101	0.554	0.192	0.552	0.101	0.095	0.289	0.101	0.361	0.437	0.396		0.037	0.109	0.561	0.199	0.559	0.108	0.102	0.296	0.108	0.368	0.444	0.399
0.521	0.655	0.192	0.086	0.095	0.399	0.145	0.59	0.497	0.161	0.065	0.304		0.527	0.667	0.205	0.098	0.108	0.41	0.157	0.601	0.51	0.173	0.077	0.311		0.529	0.674	0.212	0.106	0.115	0.417	0.165	0.609	0.518	0.181	0.085	0.313
0.013	0.297	0.102	0.457	0.306	0.118	0.539	0.063	0.536	0.108	0.127	0.454		0.017	0.311	0.115	0.469	0.319	0.131	0.552	0.074	0.548	0.12	0.14	0.461		0.02	0.319	0.123	0.477	0.326	0.139	0.56	0.081	0.556	0.128	0.149	0.464
0.063	0.075	0.116	0.244	0.219	0.216	0.108	0.182	0.115	0.105	0.069	0.71		0.069	0.088	0.128	0.258	0.233	0.229	0.121	0.196	0.128	0.118	0.082	0.717		0.073	0.097	0.136	0.266	0.242	0.238	0.13	0.205	0.137	0.127	0.091	0.721
-0.011	0.292	0.117	0.121	0.211	0.089	0.156	0.896	0.438	0.44	0.547	0.55		-0.006	0.306	0.13	0.135	0.225	0.103	0.171	0.911	0.452	0.455	0.563	0.554		-0.002	0.314	0.138	0.144	0.234	0.112	0.18	0.92	0.462	0.465	0.572	0.557
0.121	0.197	0.389	0.12	0.073	0.479	0.024	0.048	0.024	0.038	0.007	-0.032		0.123	0.21	0.403	0.136	0.089	0.493	0.034	0.059	0.034	0.048	0.015	-0.03		0.125	0.219	0.413	0.146	0.099	0.502	0.041	0.067	0.041	0.054	0.019	-0.028
RepA1-96h	OD												RepA2-96h	OD												RepA3-96h	OD
0	0.309	0.026	0.763	0.036	0.069	0.325	0.076	0.45	0.125	0.443	0.58		0	0.309	0.039	0.775	0.052	0.083	0.337	0.088	0.462	0.137	0.451	0.581		0	0.309	0.051	0.787	0.067	0.097	0.35	0.1	0.475	0.147	0.458	0.581
0.027	0.072	0.448	0.035	0.541	0.013	0.511	-0.06	0.495	0.282	0.297	0.554		0.026	0.088	0.464	0.052	0.556	0.029	0.524	-0.048	0.51	0.296	0.311	0.558		0.026	0.105	0.479	0.068	0.571	0.045	0.537	-0.036	0.524	0.309	0.326	0.559
0.028	0.022	0.423	0.128	0.556	0.032	0.03	0.279	0.043	0.378	0.376	0.367		0.03	0.04	0.442	0.145	0.571	0.047	0.045	0.293	0.057	0.391	0.39	0.373		0.032	0.058	0.46	0.161	0.585	0.062	0.06	0.307	0.07	0.405	0.403	0.378
0.582	0.642	0.136	0.025	0.035	0.413	0.097	0.612	0.44	0.105	0.017	0.373		0.586	0.657	0.153	0.041	0.051	0.428	0.113	0.626	0.455	0.12	0.032	0.379		0.59	0.673	0.17	0.057	0.067	0.442	0.128	0.64	0.47	0.135	0.047	0.383
-0.002	0.236	0.041	0.474	0.282	0.063	0.524	0.018	0.492	0.068	0.077	0.5		0	0.254	0.058	0.489	0.299	0.079	0.542	0.031	0.507	0.083	0.094	0.506		0.004	0.271	0.074	0.504	0.315	0.095	0.558	0.044	0.522	0.099	0.11	0.512
0.052	0.028	0.072	0.225	0.157	0.236	0.054	0.15	0.062	0.056	0.031	0.691		0.057	0.044	0.087	0.24	0.174	0.252	0.072	0.167	0.079	0.073	0.046	0.697		0.064	0.061	0.103	0.257	0.193	0.268	0.09	0.185	0.096	0.09	0.063	0.702
-0.033	0.246	0.072	0.072	0.228	0.033	0.161	0.842	0.453	0.568	0.597	0.694		-0.028	0.264	0.087	0.089	0.246	0.051	0.179	0.859	0.471	0.585	0.614	0.699		-0.021	0.282	0.104	0.106	0.264	0.07	0.198	0.877	0.489	0.603	0.631	0.702
0.159	0.207	0.415	0.08	0.022	0.598	-0.001	0.009	0.003	0	0.003	-0.031		0.161	0.221	0.432	0.098	0.042	0.614	0.011	0.024	0.017	0.014	0.012	-0.03		0.161	0.236	0.448	0.116	0.061	0.63	0.023	0.039	0.03	0.027	0.022	-0.03
RepA1-120h	OD												RepA2-120h	OD												RepA3-120h	OD
0	0.278	0.016	0.947	0.023	0.06	0.38	0.073	0.515	0.131	0.59	0.606		0	0.278	0.021	0.953	0.034	0.069	0.388	0.081	0.523	0.137	0.59	0.606		0	0.278	0.026	0.957	0.042	0.076	0.394	0.088	0.529	0.141	0.591	0.607
0.02	0.063	0.418	0.033	0.618	0	0.587	-0.068	0.524	0.35	0.371	0.55		0.02	0.076	0.432	0.048	0.631	0.015	0.599	-0.057	0.537	0.362	0.384	0.55		0.02	0.086	0.442	0.059	0.641	0.025	0.608	-0.049	0.546	0.371	0.393	0.551
0.046	0.012	0.365	0.136	0.64	0.019	0.023	0.346	0.032	0.532	0.347	0.346		0.045	0.026	0.381	0.15	0.652	0.033	0.036	0.358	0.044	0.543	0.359	0.346		0.046	0.038	0.394	0.161	0.662	0.043	0.046	0.367	0.053	0.552	0.368	0.347
0.681	0.647	0.132	0.017	0.026	0.511	0.1	0.712	0.426	0.1	0.005	0.494		0.682	0.66	0.147	0.032	0.04	0.524	0.113	0.724	0.439	0.113	0.019	0.495		0.682	0.67	0.158	0.042	0.051	0.533	0.123	0.734	0.448	0.122	0.028	0.495
-0.002	0.211	0.03	0.583	0.329	0.055	0.586	0.003	0.516	0.097	0.079	0.576		-0.002	0.226	0.044	0.596	0.344	0.069	0.6	0.014	0.529	0.111	0.093	0.578		-0.002	0.237	0.055	0.606	0.354	0.079	0.61	0.023	0.539	0.121	0.104	0.579
0.079	0.031	0.074	0.293	0.149	0.392	0.058	0.167	0.072	0.072	0.03	0.618		0.079	0.045	0.088	0.308	0.164	0.407	0.074	0.183	0.087	0.087	0.044	0.621		0.079	0.056	0.098	0.318	0.176	0.417	0.086	0.195	0.098	0.098	0.054	0.622
-0.032	0.227	0.075	0.078	0.3	0.035	0.261	0.829	0.561	0.672	0.648	0.682		-0.032	0.243	0.089	0.093	0.316	0.051	0.277	0.846	0.577	0.687	0.663	0.683		-0.032	0.255	0.099	0.104	0.327	0.062	0.288	0.857	0.588	0.697	0.673	0.683
0.259	0.324	0.472	0.088	0.01	0.559	0	0.004	0.025	-0.006	0.061	-0.012		0.259	0.332	0.483	0.1	0.022	0.569	0.007	0.013	0.031	0	0.062	-0.011		0.259	0.338	0.491	0.11	0.032	0.577	0.011	0.019	0.037	0.005	0.064	-0.011
RepA1-144h	OD												RepA2-144h	OD												RepA3-144h	OD
0	0.269	0.062	0.965	0.087	0.119	0.466	0.132	0.644	0.197	0.703	0.629		0	0.268	0.066	0.969	0.093	0.125	0.471	0.137	0.648	0.201	0.703	0.628		0	0.268	0.068	0.971	0.098	0.129	0.475	0.141	0.651	0.203	0.702	0.628
0.026	0.122	0.47	0.104	0.727	0.061	0.671	-0.02	0.635	0.48	0.478	0.572		0.024	0.128	0.477	0.112	0.734	0.068	0.677	-0.015	0.642	0.485	0.484	0.57		0.024	0.134	0.482	0.118	0.74	0.074	0.682	-0.01	0.648	0.491	0.49	0.57
0.069	0.08	0.406	0.211	0.733	0.079	0.084	0.445	0.092	0.669	0.399	0.379		0.068	0.087	0.416	0.219	0.739	0.086	0.091	0.452	0.098	0.675	0.404	0.379		0.069	0.095	0.424	0.225	0.745	0.092	0.097	0.458	0.104	0.68	0.409	0.379
0.781	0.703	0.19	0.085	0.092	0.638	0.168	0.831	0.486	0.182	0.07	0.614		0.781	0.709	0.197	0.092	0.099	0.645	0.175	0.838	0.492	0.189	0.076	0.614		0.781	0.715	0.204	0.099	0.106	0.651	0.181	0.844	0.498	0.196	0.083	0.614
0.008	0.258	0.09	0.718	0.438	0.121	0.667	0.056	0.617	0.205	0.159	0.601		0.007	0.266	0.098	0.725	0.445	0.129	0.674	0.061	0.624	0.212	0.167	0.602		0.007	0.273	0.104	0.73	0.452	0.135	0.681	0.067	0.631	0.219	0.174	0.602
0.124	0.107	0.145	0.455	0.225	0.519	0.145	0.257	0.166	0.21	0.109	0.636		0.122	0.114	0.152	0.463	0.233	0.527	0.153	0.266	0.174	0.218	0.116	0.637		0.121	0.121	0.158	0.47	0.24	0.534	0.161	0.274	0.181	0.226	0.123	0.637
-0.011	0.318	0.148	0.153	0.399	0.133	0.46	0.89	0.727	0.81	0.676	0.657		-0.013	0.326	0.155	0.161	0.407	0.141	0.469	0.898	0.736	0.817	0.684	0.655		-0.013	0.333	0.162	0.168	0.415	0.149	0.477	0.905	0.743	0.824	0.691	0.655
0.355	0.495	0.571	0.161	0.07	0.564	0.052	0.059	0.091	0.038	0.126	0.032		0.355	0.498	0.577	0.167	0.077	0.569	0.055	0.064	0.095	0.042	0.128	0.03		0.355	0.503	0.582	0.174	0.085	0.574	0.059	0.069	0.1	0.045	0.13	0.03
RepA1-168h	OD												RepA2-168h	OD												RepA3-168h	OD
0	0.22	0.007	0.9	0.015	0.05	0.433	0.069	0.635	0.162	0.747	0.551		0	0.219	0.008	0.905	0.023	0.057	0.439	0.077	0.641	0.165	0.748	0.552		0	0.218	0.009	0.907	0.029	0.062	0.443	0.081	0.644	0.167	0.747	0.551
-0.008	0.048	0.399	0.031	0.687	-0.022	0.612	-0.091	0.637	0.486	0.429	0.529		-0.01	0.057	0.412	0.045	0.7	-0.008	0.623	-0.08	0.65	0.498	0.441	0.53		-0.011	0.064	0.42	0.054	0.707	0.001	0.63	-0.074	0.658	0.505	0.448	0.529
0.065	-0.007	0.311	0.143	0.673	0	0.005	0.412	0.021	0.613	0.313	0.373		0.064	0.004	0.326	0.157	0.685	0.012	0.018	0.423	0.033	0.624	0.325	0.373		0.063	0.013	0.337	0.166	0.693	0.021	0.026	0.43	0.041	0.631	0.333	0.372
0.783	0.613	0.091	0.007	0.013	0.628	0.097	0.826	0.403	0.136	0	0.681		0.784	0.625	0.105	0.021	0.026	0.641	0.11	0.838	0.416	0.15	0.014	0.682		0.783	0.634	0.114	0.03	0.035	0.649	0.119	0.845	0.424	0.159	0.022	0.681
-0.032	0.155	0.004	0.711	0.414	0.042	0.585	-0.02	0.586	0.173	0.093	0.57		-0.031	0.169	0.018	0.724	0.428	0.056	0.598	-0.008	0.599	0.189	0.108	0.571		-0.032	0.179	0.027	0.732	0.436	0.065	0.607	0	0.608	0.199	0.118	0.57
0.136	0.037	0.071	0.513	0.142	0.473	0.071	0.182	0.102	0.4	0.04	0.57		0.135	0.05	0.084	0.527	0.157	0.487	0.088	0.199	0.119	0.417	0.055	0.572		0.134	0.059	0.093	0.535	0.166	0.496	0.098	0.21	0.13	0.429	0.064	0.572
-0.039	0.265	0.075	0.08	0.335	0.093	0.461	0.765	0.697	0.795	0.534	0.571		-0.039	0.28	0.088	0.094	0.351	0.108	0.478	0.782	0.713	0.81	0.548	0.572		-0.04	0.29	0.097	0.103	0.361	0.119	0.489	0.793	0.723	0.82	0.557	0.571
0.391	0.57	0.561	0.1	-0.004	0.471	0.007	0.003	0.057	-0.007	0.131	0.025		0.392	0.575	0.571	0.111	0.008	0.48	0.013	0.011	0.064	-0.001	0.132	0.027		0.391	0.579	0.578	0.118	0.016	0.485	0.016	0.015	0.069	0.001	0.131	0.026
RepA1-192h	OD												RepA2-192h	OD												RepA3-192h	OD
0	0.192	0.009	0.915	0.034	0.062	0.462	0.085	0.68	0.185	0.795	0.367		0	0.191	0.006	0.918	0.043	0.072	0.472	0.096	0.689	0.186	0.794	0.366		0	0.191	0.003	0.919	0.046	0.074	0.474	0.099	0.691	0.185	0.795	0.367
-0.034	0.074	0.438	0.071	0.727	0.005	0.635	-0.072	0.72	0.571	0.451	0.506		-0.036	0.081	0.45	0.085	0.74	0.019	0.646	-0.061	0.733	0.583	0.463	0.505		-0.036	0.082	0.455	0.09	0.745	0.025	0.651	-0.057	0.738	0.588	0.468	0.506
0.081	0.023	0.323	0.187	0.702	0.025	0.03	0.466	0.049	0.622	0.324	0.403		0.08	0.036	0.34	0.203	0.714	0.04	0.044	0.478	0.062	0.634	0.335	0.402		0.08	0.041	0.347	0.208	0.719	0.045	0.049	0.483	0.068	0.638	0.339	0.402
0.73	0.634	0.11	0.04	0.044	0.713	0.136	0.924	0.429	0.201	0.038	0.744		0.73	0.647	0.125	0.055	0.06	0.727	0.15	0.937	0.444	0.216	0.052	0.742		0.73	0.65	0.131	0.06	0.066	0.731	0.156	0.942	0.449	0.222	0.057	0.743
-0.058	0.17	0.032	0.801	0.508	0.074	0.609	0.008	0.648	0.257	0.15	0.58		-0.058	0.184	0.047	0.814	0.523	0.092	0.624	0.026	0.664	0.274	0.165	0.577		-0.058	0.189	0.052	0.819	0.528	0.098	0.63	0.032	0.671	0.28	0.171	0.575
0.18	0.08	0.106	0.577	0.179	0.509	0.124	0.233	0.163	0.552	0.083	0.609		0.179	0.094	0.12	0.594	0.196	0.526	0.143	0.252	0.181	0.569	0.097	0.607		0.179	0.098	0.125	0.599	0.202	0.532	0.15	0.259	0.188	0.575	0.102	0.606
-0.043	0.334	0.112	0.122	0.398	0.173	0.583	0.779	0.602	0.899	0.516	0.51		-0.044	0.349	0.126	0.137	0.415	0.191	0.601	0.796	0.619	0.914	0.529	0.509		-0.044	0.354	0.131	0.142	0.422	0.197	0.608	0.802	0.625	0.92	0.533	0.51
0.378	0.68	0.646	0.141	0.029	0.468	0.028	0.025	0.094	0.011	0.193	0.04		0.377	0.685	0.655	0.154	0.042	0.476	0.033	0.03	0.101	0.012	0.189	0.039		0.377	0.686	0.657	0.158	0.046	0.478	0.034	0.032	0.103	0.012	0.186	0.04

## Sheet: G17B
RepB1-0h	OD												RepB2-0h	OD												RepB3-0h	OD
0	0.03	0.037	0.011	0.015	0.012	0.013	0.005	0.015	0.006	0.047	0.028		0	0.029	0.037	0.011	0.014	0.011	0.013	0.005	0.015	0.006	0.047	0.026		0	0.028	0.037	0.01	0.014	0.01	0.012	0.005	0.015	0.005	0.047	0.025
-0.014	-0.004	0.047	-0.019	-0.02	-0.021	-0.027	-0.023	-0.02	-0.023	0.003	-0.006		-0.014	-0.004	0.048	-0.019	-0.02	-0.022	-0.027	-0.023	-0.02	-0.023	0.001	-0.006		-0.013	-0.005	0.048	-0.02	-0.021	-0.022	-0.028	-0.022	-0.021	-0.023	0	-0.007
-0.017	-0.005	-0.004	0	0.004	-0.003	-0.014	-0.01	-0.009	-0.01	0.005	0.007		-0.016	-0.005	-0.005	0	0.003	-0.003	-0.014	-0.01	-0.009	-0.01	0.005	0.006		-0.016	-0.005	-0.005	0	0.003	-0.003	-0.014	-0.01	-0.01	-0.011	0.005	0.005
0.011	-0.019	-0.005	-0.019	0	-0.015	-0.003	-0.012	-0.02	-0.022	0.001	-0.02		0.011	-0.019	-0.006	-0.02	0	-0.015	-0.003	-0.012	-0.02	-0.023	0	-0.02		0.011	-0.019	-0.007	-0.02	0	-0.015	-0.004	-0.012	-0.02	-0.023	0	-0.02
-0.013	0.003	0.006	-0.01	0.037	-0.011	-0.004	-0.009	0.001	-0.001	0.015	0.01		-0.013	0.003	0.006	-0.011	0.037	-0.011	-0.004	-0.009	0.002	-0.002	0.016	0.01		-0.013	0.003	0.005	-0.012	0.037	-0.011	-0.004	-0.009	0.002	-0.001	0.016	0.009
-0.008	-0.025	-0.005	-0.027	-0.024	-0.001	-0.013	-0.008	0.001	-0.018	-0.009	-0.014		-0.008	-0.025	-0.006	-0.027	-0.024	-0.002	-0.013	-0.008	0.001	-0.019	-0.01	-0.014		-0.008	-0.025	-0.007	-0.028	-0.024	-0.003	-0.013	-0.008	0	-0.019	-0.011	-0.015
-0.014	0.575	-0.009	-0.014	-0.028	0.027	-0.018	-0.023	-0.005	-0.025	-0.001	-0.022		-0.014	0.574	-0.01	-0.014	-0.028	0.027	-0.018	-0.023	-0.006	-0.025	-0.001	-0.022		-0.014	0.573	-0.009	-0.015	-0.029	0.026	-0.018	-0.023	-0.006	-0.026	-0.002	-0.023
-0.023	-0.017	0.019	-0.021	-0.025	-0.024	-0.023	-0.031	-0.012	0.121	-0.021	-0.024		-0.023	-0.017	0.019	-0.021	-0.025	-0.024	-0.023	-0.031	-0.012	0.121	-0.021	-0.024		-0.022	-0.017	0.019	-0.021	-0.026	-0.024	-0.023	-0.031	-0.012	0.119	-0.021	-0.024
RepB1-24h	OD												RepB2-24h	OD												RepB3-24h	OD
0	0.037	0.036	0.021	0.013	0.024	0.031	0.012	0.027	0.027	0.041	0.097		0	0.037	0.035	0.021	0.014	0.025	0.032	0.013	0.028	0.028	0.042	0.098		0	0.036	0.034	0.02	0.013	0.024	0.031	0.012	0.027	0.027	0.041	0.097
0.049	-0.03	0.145	0.007	0.058	-0.015	0.026	-0.056	0.023	0.014	-0.063	0.079		0.049	-0.029	0.148	0.009	0.062	-0.008	0.036	-0.05	0.028	0.02	-0.059	0.081		0.048	-0.03	0.149	0.009	0.064	-0.006	0.042	-0.047	0.031	0.022	-0.058	0.08
-0.002	-0.024	0.026	0.038	0.083	0.026	0.005	0.014	0.003	-0.007	0.053	0.055		-0.001	-0.023	0.036	0.044	0.089	0.032	0.011	0.021	0.012	-0.001	0.057	0.056		-0.002	-0.024	0.041	0.047	0.091	0.034	0.014	0.024	0.017	0.001	0.059	0.055
0.033	0.071	0.021	-0.013	0.021	0.018	0.023	0.054	0.021	0.017	0.003	-0.004		0.034	0.073	0.026	-0.008	0.026	0.023	0.029	0.06	0.027	0.023	0.009	-0.004		0.033	0.072	0.029	-0.006	0.029	0.025	0.032	0.063	0.029	0.026	0.01	-0.005
-0.04	0.022	0.035	0.035	0.052	-0.01	0.105	-0.023	0.088	0.018	0.026	0.079		-0.04	0.025	0.04	0.04	0.058	-0.006	0.11	-0.019	0.093	0.025	0.026	0.08		-0.041	0.025	0.043	0.042	0.06	-0.005	0.113	-0.016	0.095	0.028	0.026	0.079
-0.014	-0.074	0.002	-0.011	0.037	-0.019	0.01	0.01	0.019	-0.008	-0.01	0		-0.014	-0.073	0.007	-0.005	0.043	-0.014	0.015	0.015	0.025	-0.003	-0.007	0.001		-0.015	-0.073	0.01	-0.003	0.046	-0.012	0.017	0.018	0.028	-0.001	-0.006	0
-0.012	0.428	-0.003	0.009	-0.076	0.019	0.008	0.012	0.028	-0.002	0.007	-0.015		-0.012	0.427	0.001	0.014	-0.069	0.025	0.013	0.017	0.033	0.001	0.008	-0.015		-0.013	0.426	0.003	0.017	-0.067	0.027	0.015	0.019	0.035	0.002	0.007	-0.016
0.006	0.011	0.044	-0.015	-0.058	0.005	-0.02	-0.018	-0.006	-0.019	-0.015	-0.035		0.006	0.012	0.045	-0.015	-0.057	0.005	-0.02	-0.018	-0.006	-0.019	-0.015	-0.035		0.005	0.011	0.044	-0.016	-0.059	0.004	-0.021	-0.019	-0.007	-0.02	-0.016	-0.036
RepB1-48h	OD												RepB2-48h	OD												RepB3-48h	OD
0	0.248	0.087	0.259	0.07	0.103	0.192	0.106	0.223	0.145	0.237	0.311		0	0.248	0.092	0.266	0.077	0.111	0.199	0.113	0.23	0.152	0.245	0.313		0	0.245	0.096	0.271	0.082	0.116	0.204	0.118	0.235	0.156	0.251	0.313
0.064	0.113	0.404	0.128	0.298	0.115	0.342	0.004	0.281	0.207	0.072	0.335		0.064	0.121	0.412	0.136	0.306	0.125	0.35	0.01	0.287	0.213	0.079	0.338		0.063	0.127	0.418	0.143	0.312	0.134	0.357	0.016	0.292	0.219	0.084	0.341
0.031	0.091	0.389	0.188	0.318	0.134	0.104	0.191	0.151	0.17	0.305	0.301		0.033	0.102	0.399	0.197	0.325	0.142	0.112	0.198	0.16	0.176	0.31	0.304		0.034	0.109	0.407	0.205	0.331	0.149	0.119	0.203	0.166	0.181	0.315	0.306
0.27	0.395	0.134	0.062	0.101	0.249	0.16	0.339	0.299	0.175	0.069	0.143		0.273	0.403	0.142	0.07	0.11	0.258	0.17	0.347	0.306	0.184	0.077	0.146		0.274	0.41	0.148	0.076	0.117	0.265	0.178	0.353	0.312	0.191	0.083	0.148
0.042	0.222	0.111	0.251	0.233	0.065	0.36	0.058	0.385	0.115	0.121	0.274		0.044	0.232	0.118	0.258	0.241	0.073	0.368	0.066	0.392	0.125	0.128	0.277		0.044	0.239	0.124	0.264	0.247	0.079	0.374	0.072	0.399	0.132	0.132	0.28
0.059	0.027	0.102	0.16	0.201	0.122	0.092	0.113	0.126	0.074	0.064	0.328		0.064	0.035	0.109	0.168	0.209	0.129	0.1	0.122	0.134	0.08	0.071	0.331		0.066	0.041	0.116	0.175	0.216	0.136	0.107	0.129	0.141	0.086	0.077	0.333
0.02	0.461	0.105	0.123	0.088	0.102	0.08	0.345	0.216	0.15	0.206	0.164		0.025	0.469	0.114	0.133	0.098	0.111	0.088	0.355	0.225	0.158	0.214	0.167		0.027	0.476	0.12	0.14	0.107	0.118	0.096	0.363	0.232	0.165	0.221	0.168
0.064	0.146	0.175	0.133	0.074	0.197	0.089	0.064	0.054	0.054	0.025	-0.027		0.065	0.156	0.188	0.144	0.086	0.206	0.096	0.072	0.062	0.06	0.029	-0.026		0.065	0.162	0.196	0.152	0.093	0.213	0.1	0.078	0.067	0.064	0.032	-0.026
RepB1-72h	OD												RepB2-72h	OD												RepB3-72h	OD
0	0.337	0.075	0.675	0.073	0.118	0.34	0.138	0.436	0.169	0.401	0.475		0	0.337	0.076	0.677	0.076	0.121	0.344	0.142	0.441	0.172	0.405	0.476		0	0.337	0.074	0.677	0.077	0.123	0.346	0.144	0.443	0.174	0.407	0.476
0.027	0.146	0.52	0.132	0.526	0.134	0.629	0.028	0.518	0.325	0.229	0.508		0.028	0.15	0.526	0.138	0.531	0.141	0.635	0.032	0.522	0.33	0.234	0.509		0.028	0.152	0.529	0.141	0.535	0.146	0.639	0.035	0.525	0.333	0.237	0.509
0.02	0.13	0.593	0.238	0.565	0.167	0.13	0.37	0.183	0.374	0.485	0.405		0.021	0.136	0.598	0.244	0.57	0.173	0.135	0.375	0.19	0.379	0.489	0.406		0.02	0.139	0.603	0.249	0.574	0.176	0.139	0.378	0.194	0.382	0.492	0.405
0.493	0.654	0.176	0.094	0.133	0.469	0.215	0.617	0.539	0.19	0.085	0.301		0.495	0.659	0.181	0.1	0.138	0.475	0.221	0.623	0.544	0.196	0.091	0.303		0.495	0.662	0.185	0.104	0.142	0.479	0.226	0.627	0.548	0.201	0.094	0.302
0.003	0.326	0.13	0.453	0.346	0.094	0.528	0.101	0.496	0.163	0.133	0.459		0.004	0.331	0.135	0.458	0.352	0.1	0.534	0.106	0.502	0.17	0.137	0.46		0.004	0.335	0.139	0.461	0.356	0.104	0.539	0.11	0.506	0.174	0.14	0.459
0.057	0.084	0.163	0.277	0.234	0.251	0.135	0.164	0.174	0.117	0.094	0.737		0.056	0.089	0.168	0.283	0.24	0.257	0.141	0.17	0.179	0.122	0.098	0.739		0.055	0.093	0.172	0.287	0.244	0.261	0.145	0.174	0.184	0.125	0.101	0.739
-0.019	0.536	0.144	0.172	0.267	0.136	0.176	0.949	0.48	0.411	0.574	0.531		-0.019	0.541	0.15	0.178	0.274	0.142	0.183	0.955	0.486	0.417	0.579	0.533		-0.02	0.545	0.154	0.182	0.28	0.147	0.187	0.96	0.491	0.421	0.583	0.533
0.119	0.235	0.349	0.159	0.116	0.492	0.056	0.069	0.055	0.056	0.01	-0.037		0.12	0.239	0.355	0.164	0.122	0.496	0.058	0.072	0.058	0.058	0.01	-0.036		0.12	0.241	0.358	0.167	0.125	0.498	0.058	0.073	0.059	0.058	0.008	-0.036
RepB1-96h	OD												RepB2-96h	OD												RepB3-96h	OD
0	0.325	0.068	0.851	0.05	0.094	0.358	0.117	0.48	0.151	0.463	0.518		0	0.325	0.07	0.855	0.055	0.101	0.364	0.123	0.486	0.156	0.468	0.518		0	0.325	0.072	0.858	0.059	0.105	0.368	0.127	0.491	0.16	0.472	0.517
0.026	0.105	0.47	0.093	0.542	0.085	0.646	-0.002	0.522	0.335	0.253	0.539		0.025	0.111	0.477	0.099	0.548	0.092	0.656	0.003	0.527	0.34	0.258	0.537		0.024	0.116	0.484	0.105	0.554	0.101	0.664	0.009	0.531	0.345	0.264	0.538
0.033	0.079	0.488	0.195	0.599	0.12	0.089	0.384	0.147	0.426	0.463	0.398		0.033	0.086	0.5	0.204	0.605	0.127	0.096	0.39	0.157	0.432	0.468	0.398		0.033	0.094	0.51	0.213	0.611	0.134	0.103	0.396	0.166	0.437	0.472	0.398
0.577	0.665	0.143	0.057	0.094	0.496	0.172	0.653	0.501	0.148	0.056	0.388		0.577	0.672	0.15	0.064	0.101	0.505	0.184	0.66	0.507	0.155	0.062	0.387		0.577	0.678	0.156	0.07	0.108	0.512	0.193	0.666	0.511	0.162	0.068	0.389
0.007	0.28	0.097	0.488	0.333	0.064	0.541	0.057	0.469	0.136	0.117	0.522		0.007	0.289	0.104	0.494	0.342	0.07	0.547	0.065	0.476	0.145	0.122	0.523		0.007	0.297	0.11	0.5	0.349	0.076	0.553	0.072	0.483	0.153	0.125	0.524
0.068	0.057	0.142	0.281	0.196	0.291	0.106	0.145	0.146	0.094	0.071	0.747		0.07	0.064	0.148	0.289	0.206	0.297	0.113	0.152	0.154	0.099	0.074	0.748		0.07	0.07	0.154	0.295	0.213	0.303	0.119	0.159	0.161	0.104	0.079	0.749
-0.024	0.5	0.112	0.139	0.304	0.099	0.201	0.9	0.531	0.552	0.617	0.678		-0.023	0.506	0.119	0.147	0.315	0.107	0.208	0.906	0.537	0.558	0.619	0.678		-0.021	0.512	0.125	0.154	0.324	0.114	0.215	0.913	0.544	0.564	0.625	0.678
0.164	0.251	0.378	0.124	0.071	0.598	0.02	0.04	0.038	0.029	0.005	-0.029		0.163	0.256	0.38	0.132	0.079	0.604	0.031	0.045	0.043	0.032	0.004	-0.03		0.163	0.261	0.388	0.139	0.088	0.611	0.042	0.052	0.049	0.037	0.007	-0.029
RepB1-120h	OD												RepB2-120h	OD												RepB3-120h	OD
0	0.298	0.062	0.968	0.041	0.09	0.415	0.118	0.541	0.157	0.607	0.555		0	0.298	0.063	0.971	0.046	0.095	0.42	0.124	0.547	0.161	0.612	0.555		0	0.299	0.063	0.972	0.05	0.099	0.424	0.129	0.552	0.165	0.616	0.555
0.027	0.098	0.45	0.088	0.611	0.065	0.732	-0.011	0.557	0.404	0.329	0.541		0.027	0.104	0.458	0.095	0.617	0.073	0.742	-0.005	0.563	0.409	0.335	0.542		0.027	0.11	0.465	0.103	0.624	0.083	0.751	0.001	0.568	0.415	0.342	0.542
0.065	0.063	0.424	0.203	0.68	0.097	0.076	0.442	0.137	0.575	0.436	0.384		0.064	0.071	0.436	0.213	0.686	0.106	0.084	0.449	0.149	0.58	0.441	0.384		0.064	0.08	0.447	0.222	0.692	0.114	0.092	0.455	0.158	0.586	0.446	0.384
0.675	0.667	0.131	0.046	0.082	0.588	0.173	0.75	0.482	0.144	0.044	0.515		0.675	0.674	0.138	0.053	0.089	0.596	0.184	0.757	0.488	0.152	0.051	0.517		0.676	0.68	0.145	0.06	0.096	0.603	0.193	0.763	0.494	0.16	0.057	0.517
0.008	0.248	0.085	0.592	0.37	0.055	0.583	0.034	0.49	0.168	0.12	0.603		0.007	0.257	0.091	0.598	0.378	0.061	0.589	0.042	0.497	0.176	0.123	0.603		0.008	0.265	0.097	0.604	0.385	0.068	0.595	0.049	0.505	0.184	0.129	0.604
0.096	0.055	0.145	0.346	0.185	0.448	0.104	0.16	0.151	0.106	0.073	0.683		0.095	0.062	0.152	0.353	0.194	0.455	0.112	0.168	0.158	0.112	0.079	0.683		0.095	0.069	0.158	0.36	0.203	0.461	0.119	0.175	0.166	0.118	0.084	0.683
-0.025	0.482	0.105	0.136	0.349	0.098	0.287	0.861	0.672	0.769	0.71	0.677		-0.024	0.49	0.113	0.144	0.36	0.106	0.295	0.869	0.68	0.776	0.717	0.677		-0.025	0.496	0.12	0.152	0.369	0.114	0.302	0.877	0.686	0.783	0.723	0.677
0.257	0.361	0.494	0.124	0.059	0.584	0.018	0.04	0.052	0.008	0.068	-0.015		0.257	0.367	0.502	0.133	0.068	0.59	0.025	0.044	0.057	0.011	0.069	-0.015		0.257	0.372	0.509	0.14	0.076	0.595	0.031	0.049	0.061	0.013	0.069	-0.015
RepB1-144h	OD												RepB2-144h	OD												RepB3-144h	OD
0	0.294	0.103	0.991	0.096	0.143	0.498	0.177	0.661	0.222	0.735	0.584		0	0.293	0.101	0.991	0.098	0.145	0.5	0.18	0.664	0.225	0.737	0.583		0	0.293	0.099	0.992	0.1	0.147	0.503	0.183	0.668	0.227	0.739	0.583
0.046	0.156	0.511	0.161	0.718	0.144	0.844	0.042	0.661	0.537	0.436	0.57		0.045	0.159	0.516	0.166	0.722	0.15	0.85	0.046	0.665	0.541	0.44	0.569		0.045	0.162	0.521	0.17	0.726	0.156	0.854	0.05	0.668	0.545	0.443	0.568
0.122	0.131	0.475	0.29	0.773	0.167	0.145	0.538	0.214	0.706	0.471	0.403		0.121	0.136	0.484	0.297	0.777	0.172	0.151	0.543	0.22	0.71	0.474	0.402		0.121	0.141	0.491	0.303	0.782	0.177	0.156	0.547	0.224	0.714	0.477	0.401
0.783	0.716	0.182	0.102	0.139	0.719	0.257	0.87	0.53	0.227	0.101	0.646		0.783	0.721	0.187	0.107	0.144	0.725	0.265	0.875	0.535	0.233	0.106	0.644		0.783	0.725	0.192	0.112	0.148	0.73	0.271	0.879	0.539	0.239	0.109	0.644
0.025	0.295	0.137	0.708	0.471	0.112	0.652	0.094	0.594	0.274	0.183	0.63		0.024	0.301	0.142	0.712	0.476	0.117	0.657	0.1	0.599	0.281	0.186	0.63		0.024	0.306	0.147	0.716	0.481	0.121	0.661	0.105	0.604	0.286	0.189	0.629
0.146	0.121	0.211	0.486	0.261	0.576	0.177	0.243	0.229	0.225	0.138	0.668		0.145	0.126	0.216	0.491	0.268	0.58	0.182	0.248	0.234	0.229	0.141	0.665		0.145	0.13	0.221	0.496	0.273	0.585	0.187	0.252	0.239	0.233	0.145	0.665
0.002	0.533	0.171	0.209	0.447	0.193	0.452	0.918	0.829	0.886	0.712	0.66		0.001	0.538	0.177	0.214	0.454	0.199	0.457	0.923	0.834	0.891	0.716	0.659		-0.001	0.542	0.182	0.22	0.46	0.204	0.462	0.928	0.838	0.895	0.72	0.659
0.352	0.54	0.615	0.2	0.127	0.615	0.098	0.1	0.123	0.047	0.133	0.036		0.351	0.543	0.62	0.205	0.133	0.618	0.099	0.102	0.125	0.047	0.132	0.035		0.352	0.546	0.624	0.209	0.137	0.62	0.099	0.103	0.127	0.048	0.131	0.035
RepB1-168h	OD												RepB2-168h	OD												RepB3-168h	OD
0	0.273	0.105	0.993	0.067	0.115	0.501	0.148	0.689	0.213	0.795	0.595		0	0.273	0.105	0.994	0.07	0.118	0.505	0.153	0.694	0.217	0.795	0.595		0	0.272	0.103	0.993	0.072	0.12	0.509	0.158	0.698	0.22	0.797	0.595
0.047	0.111	0.454	0.118	0.709	0.073	0.797	0.012	0.718	0.598	0.438	0.573		0.047	0.113	0.464	0.126	0.716	0.088	0.815	0.018	0.723	0.604	0.444	0.573		0.045	0.115	0.471	0.133	0.722	0.099	0.828	0.023	0.728	0.61	0.45	0.572
0.19	0.046	0.362	0.247	0.76	0.107	0.099	0.549	0.138	0.702	0.441	0.405		0.189	0.056	0.384	0.257	0.767	0.119	0.108	0.555	0.159	0.708	0.446	0.404		0.188	0.067	0.4	0.266	0.772	0.129	0.116	0.561	0.175	0.713	0.451	0.404
0.825	0.656	0.134	0.064	0.099	0.734	0.212	0.907	0.501	0.221	0.081	0.766		0.826	0.666	0.141	0.072	0.106	0.747	0.224	0.914	0.507	0.229	0.087	0.767		0.825	0.673	0.148	0.078	0.113	0.755	0.233	0.919	0.512	0.236	0.093	0.766
0.029	0.206	0.089	0.741	0.481	0.081	0.621	0.052	0.607	0.299	0.183	0.638		0.029	0.217	0.097	0.747	0.489	0.088	0.628	0.06	0.615	0.306	0.189	0.638		0.028	0.226	0.104	0.753	0.495	0.094	0.633	0.068	0.622	0.313	0.194	0.637
0.201	0.079	0.172	0.568	0.204	0.583	0.161	0.23	0.214	0.456	0.129	0.651		0.201	0.089	0.182	0.577	0.215	0.59	0.169	0.237	0.222	0.462	0.135	0.651		0.199	0.096	0.189	0.584	0.224	0.596	0.175	0.243	0.229	0.468	0.14	0.65
0.021	0.394	0.12	0.162	0.393	0.202	0.522	0.834	0.778	0.906	0.613	0.631		0.02	0.404	0.132	0.173	0.41	0.211	0.53	0.844	0.787	0.915	0.62	0.631		0.019	0.412	0.14	0.181	0.421	0.218	0.536	0.85	0.792	0.92	0.626	0.63
0.42	0.644	0.582	0.154	0.062	0.566	0.063	0.073	0.116	0.057	0.169	0.085		0.42	0.648	0.592	0.164	0.072	0.572	0.067	0.078	0.12	0.057	0.169	0.085		0.419	0.65	0.599	0.171	0.079	0.576	0.069	0.08	0.124	0.056	0.168	0.084
RepB1-192h	OD												RepB2-192h	OD												RepB3-192h	OD
0	0.108	-0.01	0.904	-0.006	0.04	0.442	0.084	0.65	0.161	0.78	0.452		0	0.107	-0.012	0.903	-0.006	0.041	0.444	0.086	0.652	0.163	0.782	0.451		0	0.107	-0.012	0.902	-0.005	0.042	0.445	0.088	0.654	0.163	0.783	0.451
-0.115	0.039	0.402	0.072	0.652	0.044	0.781	-0.063	0.701	0.587	0.381	0.45		-0.116	0.038	0.405	0.074	0.655	0.047	0.783	-0.061	0.703	0.589	0.384	0.448		-0.116	0.038	0.408	0.078	0.658	0.051	0.786	-0.058	0.706	0.592	0.386	0.447
0.097	0.013	0.368	0.217	0.693	0.064	0.04	0.51	0.123	0.613	0.351	0.28		0.094	0.015	0.372	0.221	0.696	0.067	0.044	0.513	0.128	0.616	0.353	0.278		0.093	0.017	0.376	0.226	0.699	0.07	0.048	0.516	0.132	0.619	0.355	0.276
0.626	0.596	0.061	0.002	0.031	0.741	0.18	0.904	0.421	0.194	0.018	0.722		0.625	0.599	0.065	0.005	0.035	0.745	0.185	0.908	0.424	0.198	0.021	0.721		0.625	0.602	0.068	0.009	0.038	0.749	0.19	0.911	0.428	0.202	0.024	0.72
-0.112	0.154	0.024	0.735	0.477	0.011	0.544	-0.004	0.582	0.284	0.123	0.521		-0.113	0.158	0.027	0.738	0.481	0.014	0.548	0	0.586	0.288	0.125	0.52		-0.113	0.161	0.031	0.741	0.485	0.018	0.551	0.004	0.59	0.292	0.128	0.518
0.123	0.041	0.125	0.546	0.166	0.517	0.108	0.182	0.171	0.576	0.066	0.507		0.121	0.043	0.128	0.55	0.171	0.52	0.112	0.185	0.175	0.579	0.068	0.506		0.121	0.046	0.132	0.554	0.175	0.523	0.116	0.189	0.179	0.582	0.071	0.506
-0.091	0.28	0.082	0.13	0.395	0.192	0.541	0.742	0.595	0.883	0.488	0.46		-0.092	0.283	0.086	0.135	0.4	0.196	0.544	0.746	0.599	0.886	0.49	0.459		-0.093	0.286	0.09	0.139	0.405	0.201	0.548	0.751	0.603	0.89	0.493	0.459
0.275	0.673	0.55	0.126	0.029	0.492	0.013	0.003	0.051	-0.046	0.084	-0.016		0.274	0.674	0.552	0.129	0.033	0.493	0.01	0.003	0.051	-0.048	0.083	-0.017		0.274	0.674	0.555	0.131	0.035	0.494	0.008	0.002	0.051	-0.05	0.083	-0.016

## Sheet: G18A
RepA1-0h	OD												RepA2-0h	OD												RepA3-0h	OD
0	0.014	-0.001	-0.001	-0.01	0.006	-0.002	0.001	0.002	0.015	0.018	0.022		0	0.013	0	-0.002	-0.012	0.006	-0.005	-0.001	0.001	0.013	0.016	0.022		0	0.013	0	-0.002	-0.012	0.006	-0.004	-0.001	0.002	0.013	0.016	0.022
-0.021	-0.034	0.074	-0.029	-0.049	-0.049	-0.04	-0.038	-0.031	-0.039	-0.011	-0.005		-0.022	-0.036	0.074	-0.03	-0.051	-0.051	-0.043	-0.039	-0.033	-0.04	-0.012	-0.007		-0.022	-0.036	0.074	-0.03	-0.051	-0.051	-0.043	-0.039	-0.033	-0.04	-0.012	-0.006
-0.02	-0.02	-0.006	-0.026	-0.02	-0.035	-0.027	-0.038	-0.025	-0.022	-0.004	-0.008		-0.02	-0.021	-0.005	-0.027	-0.023	-0.036	-0.03	-0.041	-0.026	-0.024	-0.006	-0.008		-0.02	-0.02	-0.006	-0.027	-0.023	-0.035	-0.03	-0.04	-0.026	-0.024	-0.006	-0.008
-0.04	-0.051	-0.024	-0.031	-0.036	-0.049	-0.038	-0.036	-0.036	-0.034	-0.033	-0.02		-0.042	-0.053	-0.025	-0.033	-0.04	-0.051	-0.041	-0.038	-0.039	-0.037	-0.035	-0.022		-0.042	-0.053	-0.025	-0.033	-0.039	-0.05	-0.041	-0.038	-0.039	-0.037	-0.035	-0.022
-0.003	0.005	0.023	0.028	0.021	0.002	0.009	0.06	0.021	0.017	0	0.004		-0.004	0.003	0.022	0.027	0.019	0.002	0.005	0.058	0.021	0.014	-0.002	0.003		-0.004	0.003	0.022	0.026	0.019	0.003	0.006	0.058	0.021	0.014	-0.002	0.002
-0.04	-0.045	-0.026	-0.035	-0.038	-0.034	-0.038	-0.029	-0.031	-0.036	-0.037	-0.033		-0.045	-0.048	-0.029	-0.038	-0.042	-0.037	-0.041	-0.032	-0.035	-0.04	-0.04	-0.037		-0.045	-0.048	-0.028	-0.037	-0.042	-0.036	-0.041	-0.032	-0.035	-0.04	-0.04	-0.037
0.193	0.339	-0.029	-0.019	0.002	-0.021	-0.02	-0.026	-0.023	-0.034	-0.027	-0.019		0.195	0.328	-0.033	-0.022	-0.002	-0.024	-0.024	-0.029	-0.026	-0.037	-0.031	-0.021		0.196	0.328	-0.033	-0.022	-0.002	-0.024	-0.024	-0.029	-0.026	-0.037	-0.031	-0.021
-0.043	-0.038	0.264	-0.016	-0.021	-0.026	-0.015	0	-0.02	1.065	-0.028	-0.028		-0.047	-0.041	0.258	-0.02	-0.025	-0.03	-0.019	-0.002	-0.023	1.059	-0.03	-0.032		-0.047	-0.041	0.258	-0.02	-0.025	-0.03	-0.019	-0.003	-0.023	1.055	-0.03	-0.032
RepA1-24h	OD												RepA2-24h	OD												RepA3-24h	OD
0	0.056	-0.002	0.011	-0.016	0.005	0.029	0.016	0.012	0.037	0.046	0.076		0	0.056	-0.002	0.011	-0.016	0.005	0.029	0.016	0.012	0.037	0.046	0.076		0	0.056	-0.002	0.011	-0.016	0.005	0.029	0.016	0.012	0.037	0.047	0.076
0.016	-0.002	0.147	-0.005	0.033	-0.042	0.051	-0.059	0.015	0.008	-0.052	0.058		0.016	-0.002	0.144	-0.007	0.03	-0.044	0.051	-0.059	0.016	0.008	-0.052	0.057		0.016	-0.002	0.143	-0.009	0.027	-0.046	0.049	-0.061	0.015	0.008	-0.052	0.057
-0.009	-0.035	-0.024	0.014	0.094	-0.008	0.021	-0.01	0.003	0.009	0.06	0.027		-0.009	-0.036	-0.024	0.015	0.096	-0.007	0.023	-0.008	0.005	0.011	0.06	0.027		-0.009	-0.036	-0.026	0.015	0.095	-0.007	0.023	-0.007	0.007	0.012	0.06	0.027
0.013	0.038	-0.003	-0.006	0.004	-0.004	0.02	0.026	0.025	0.012	-0.003	-0.015		0.013	0.037	-0.002	-0.005	0.005	-0.003	0.021	0.028	0.027	0.014	-0.002	-0.015		0.013	0.036	-0.003	-0.005	0.006	-0.003	0.022	0.029	0.028	0.015	-0.002	-0.015
-0.043	0.021	0.027	0.062	0.039	0.014	0.132	0.023	0.118	0.038	0.011	0.054		-0.044	0.02	0.028	0.063	0.04	0.015	0.135	0.025	0.12	0.039	0.012	0.054		-0.044	0.019	0.027	0.063	0.039	0.015	0.135	0.026	0.122	0.04	0.012	0.054
-0.019	-0.075	-0.012	0.017	0.034	-0.023	0.004	0.001	0.01	-0.011	-0.013	0.004		-0.019	-0.075	-0.013	0.017	0.035	-0.022	0.006	0.003	0.012	-0.009	-0.013	0.004		-0.019	-0.076	-0.016	0.017	0.036	-0.022	0.006	0.004	0.013	-0.009	-0.013	0.004
0.107	0.279	-0.024	0.017	-0.035	-0.003	0.005	0.031	0.029	-0.001	0.002	0.008		0.107	0.279	-0.025	0.015	-0.037	-0.004	0.004	0.03	0.029	0	0.002	0.008		0.107	0.28	-0.025	0.013	-0.038	-0.005	0.004	0.029	0.027	-0.001	0.002	0.008
-0.004	-0.018	0.25	0.025	-0.016	-0.009	-0.014	-0.005	-0.008	0.305	-0.016	-0.036		-0.004	-0.018	0.249	0.025	-0.016	-0.009	-0.014	-0.005	-0.008	0.305	-0.016	-0.036		-0.004	-0.018	0.25	0.025	-0.016	-0.009	-0.014	-0.005	-0.008	0.304	-0.016	-0.036
RepA1-48h	OD												RepA2-48h	OD												RepA3-48h	OD
0	0.316	0.005	0.207	-0.015	0.031	0.157	0.045	0.148	0.111	0.176	0.295		0	0.316	0.005	0.209	-0.015	0.032	0.161	0.046	0.151	0.116	0.177	0.295		0	0.316	0.004	0.21	-0.015	0.033	0.165	0.046	0.153	0.119	0.178	0.296
0.006	0.111	0.339	0.019	0.232	-0.02	0.255	-0.049	0.217	0.135	0.057	0.309		0.006	0.122	0.351	0.031	0.244	-0.009	0.265	-0.04	0.227	0.146	0.067	0.31		0.006	0.132	0.361	0.041	0.255	0	0.275	-0.032	0.237	0.157	0.075	0.31
0.004	-0.002	0.014	0.095	0.3	0	0.034	0.044	0.03	0.156	0.301	0.241		0.003	0.008	0.024	0.105	0.311	0.01	0.045	0.054	0.039	0.167	0.313	0.241		0.003	0.017	0.032	0.114	0.32	0.018	0.054	0.062	0.048	0.177	0.324	0.242
0.201	0.336	0.051	0.015	0.025	0.149	0.082	0.225	0.291	0.091	0.012	0.103		0.201	0.346	0.063	0.026	0.035	0.159	0.093	0.235	0.3	0.101	0.025	0.104		0.201	0.356	0.073	0.035	0.044	0.168	0.103	0.244	0.31	0.111	0.036	0.104
-0.005	0.171	0.051	0.226	0.129	0.044	0.394	0.046	0.333	0.071	0.056	0.334		-0.005	0.183	0.062	0.237	0.139	0.055	0.405	0.055	0.344	0.081	0.069	0.334		-0.005	0.194	0.071	0.246	0.147	0.066	0.415	0.063	0.353	0.091	0.081	0.334
0.034	-0.016	0.027	0.108	0.09	0.026	0.029	0.041	0.062	0.02	0.007	0.43		0.034	-0.006	0.037	0.119	0.1	0.037	0.042	0.054	0.074	0.031	0.019	0.43		0.033	0.003	0.047	0.129	0.108	0.048	0.053	0.065	0.085	0.041	0.03	0.431
0.123	0.283	0.036	0.073	0.048	0.023	0.039	0.328	0.172	0.087	0.262	0.227		0.123	0.289	0.048	0.086	0.062	0.035	0.054	0.343	0.185	0.1	0.274	0.228		0.123	0.296	0.059	0.098	0.073	0.047	0.067	0.355	0.197	0.111	0.285	0.228
0.044	0.059	0.228	0.078	0.007	0.116	-0.006	0.045	-0.018	0.33	-0.019	-0.038		0.044	0.059	0.229	0.082	0.011	0.117	-0.005	0.049	-0.015	0.362	-0.019	-0.038		0.044	0.059	0.229	0.086	0.013	0.118	-0.004	0.051	-0.011	0.383	-0.018	-0.038
RepA1-72h	OD												RepA2-72h	OD												RepA3-72h	OD
0	0.528	0.003	0.755	-0.018	0.044	0.323	0.068	0.323	0.111	0.335	0.465		0	0.528	0.003	0.755	-0.018	0.044	0.324	0.068	0.323	0.112	0.335	0.465		0	0.529	0.004	0.757	-0.017	0.045	0.328	0.069	0.326	0.116	0.337	0.466
-0.001	0.094	0.453	0.005	0.475	-0.039	0.526	-0.055	0.419	0.203	0.174	0.534		-0.001	0.103	0.463	0.016	0.488	-0.028	0.536	-0.044	0.429	0.213	0.185	0.534		0	0.114	0.475	0.028	0.499	-0.017	0.546	-0.035	0.439	0.225	0.196	0.535
0.021	-0.023	0.009	0.118	0.501	-0.012	0.018	0.071	0.02	0.364	0.434	0.353		0.021	-0.018	0.018	0.128	0.511	-0.003	0.029	0.079	0.03	0.376	0.445	0.353		0.022	-0.007	0.03	0.139	0.522	0.007	0.04	0.089	0.04	0.387	0.457	0.354
0.442	0.591	0.05	-0.001	0.016	0.337	0.103	0.467	0.58	0.051	-0.001	0.319		0.442	0.598	0.06	0.009	0.026	0.347	0.113	0.476	0.589	0.061	0.01	0.319		0.444	0.608	0.072	0.019	0.036	0.357	0.124	0.487	0.599	0.073	0.022	0.32
0.003	0.257	0.035	0.382	0.174	0.023	0.588	0.048	0.455	0.075	0.054	0.648		0.003	0.268	0.045	0.392	0.184	0.035	0.598	0.058	0.466	0.086	0.066	0.648		0.004	0.279	0.056	0.403	0.194	0.047	0.609	0.068	0.476	0.097	0.079	0.649
0.129	-0.018	0.034	0.183	0.083	0.067	0.024	0.04	0.065	0.009	-0.007	0.936		0.129	-0.006	0.045	0.195	0.094	0.079	0.037	0.054	0.077	0.02	0.004	0.937		0.129	0.004	0.056	0.206	0.106	0.091	0.05	0.067	0.09	0.032	0.016	0.938
0.108	0.333	0.047	0.086	0.163	0.004	0.072	0.964	0.336	0.415	0.468	0.519		0.108	0.339	0.058	0.099	0.18	0.017	0.088	0.978	0.35	0.428	0.481	0.519		0.109	0.348	0.07	0.112	0.195	0.03	0.101	0.992	0.364	0.441	0.493	0.521
0.109	0.2	0.231	0.097	-0.007	0.359	-0.011	0.036	-0.02	0.277	-0.022	-0.043		0.109	0.2	0.231	0.098	-0.006	0.359	-0.011	0.037	-0.019	0.306	-0.021	-0.043		0.11	0.201	0.232	0.101	-0.004	0.36	-0.01	0.039	-0.017	0.333	-0.02	-0.042
RepA1-96h	OD												RepA2-96h	OD												RepA3-96h	OD
0	0.543	0.001	0.93	-0.022	0.047	0.366	0.075	0.391	0.108	0.419	0.523		0	0.546	0.002	0.934	-0.021	0.048	0.37	0.075	0.394	0.109	0.422	0.527		0	0.545	0.002	0.934	-0.021	0.048	0.37	0.075	0.395	0.109	0.422	0.527
-0.004	0.099	0.446	0.01	0.543	-0.038	0.593	-0.052	0.448	0.233	0.229	0.572		-0.003	0.099	0.486	0.05	0.588	0.002	0.632	-0.019	0.488	0.273	0.24	0.574		-0.003	0.103	0.49	0.054	0.592	0.006	0.636	-0.016	0.492	0.278	0.246	0.574
0.027	-0.019	0.01	0.134	0.579	-0.013	0.02	0.087	0.021	0.464	0.424	0.344		0.026	0.007	0.056	0.177	0.62	0.028	0.066	0.128	0.063	0.508	0.451	0.341		0.026	0.009	0.06	0.181	0.624	0.032	0.07	0.132	0.067	0.512	0.457	0.341
0.531	0.649	0.051	-0.001	0.016	0.41	0.115	0.551	0.595	0.055	0	0.426		0.534	0.676	0.101	0.045	0.062	0.453	0.161	0.592	0.635	0.1	0.025	0.429		0.535	0.678	0.105	0.049	0.065	0.456	0.165	0.595	0.639	0.104	0.032	0.429
0	0.254	0.036	0.457	0.19	0.027	0.652	0.055	0.473	0.097	0.069	0.781		0.002	0.281	0.082	0.499	0.231	0.075	0.696	0.097	0.515	0.141	0.093	0.783		0.002	0.282	0.086	0.503	0.235	0.079	0.701	0.101	0.52	0.146	0.101	0.783
0.176	-0.007	0.043	0.24	0.088	0.116	0.04	0.066	0.086	0.019	0.007	0.938		0.177	0.012	0.084	0.286	0.131	0.162	0.09	0.115	0.134	0.061	0.014	0.94		0.177	0.013	0.088	0.29	0.136	0.166	0.095	0.119	0.139	0.067	0.021	0.941
0.111	0.343	0.064	0.103	0.222	0.014	0.119	1.065	0.38	0.533	0.551	0.629		0.113	0.343	0.086	0.143	0.264	0.047	0.143	1.101	0.418	0.565	0.552	0.632		0.112	0.344	0.088	0.148	0.269	0.052	0.147	1.106	0.424	0.571	0.559	0.632
0.137	0.27	0.256	0.108	-0.013	0.469	-0.01	0.034	-0.014	0.293	-0.002	-0.026		0.138	0.273	0.271	0.111	-0.01	0.472	-0.008	0.035	-0.013	0.278	-0.001	-0.027		0.138	0.273	0.271	0.111	-0.01	0.472	-0.008	0.035	-0.012	0.291	-0.001	-0.027
RepA1-120h	OD												RepA2-120h	OD												RepA3-120h	OD
0	0.516	-0.001	1.01	-0.024	0.053	0.427	0.089	0.458	0.113	0.55	0.624		0	0.516	-0.001	1.011	-0.024	0.053	0.428	0.09	0.459	0.113	0.551	0.625		0	0.516	-0.001	1.011	-0.024	0.053	0.428	0.089	0.459	0.113	0.551	0.624
-0.01	0.089	0.409	0.006	0.652	-0.05	0.697	-0.057	0.479	0.279	0.301	0.601		-0.01	0.092	0.417	0.014	0.662	-0.041	0.705	-0.048	0.488	0.288	0.309	0.601		-0.011	0.097	0.425	0.023	0.671	-0.033	0.713	-0.041	0.496	0.296	0.316	0.602
0.032	-0.029	0.001	0.153	0.677	-0.023	0.009	0.115	0.018	0.622	0.397	0.392		0.031	-0.023	0.009	0.161	0.685	-0.015	0.018	0.122	0.027	0.632	0.406	0.393		0.031	-0.016	0.018	0.169	0.692	-0.008	0.027	0.13	0.034	0.64	0.414	0.393
0.618	0.669	0.043	-0.006	0.008	0.515	0.132	0.663	0.596	0.066	-0.008	0.639		0.618	0.675	0.052	0.002	0.017	0.523	0.142	0.671	0.604	0.076	0.001	0.64		0.619	0.681	0.061	0.011	0.026	0.531	0.15	0.678	0.612	0.084	0.01	0.64
-0.004	0.221	0.024	0.607	0.212	0.02	0.712	0.043	0.499	0.126	0.077	0.938		-0.003	0.228	0.033	0.616	0.221	0.03	0.721	0.052	0.508	0.136	0.087	0.939		-0.003	0.236	0.042	0.624	0.229	0.04	0.729	0.06	0.516	0.144	0.096	0.939
0.3	-0.008	0.045	0.352	0.086	0.239	0.049	0.081	0.12	0.049	0.019	0.809		0.3	0.001	0.054	0.361	0.096	0.249	0.061	0.092	0.131	0.059	0.027	0.811		0.3	0.009	0.062	0.37	0.105	0.259	0.071	0.103	0.141	0.068	0.035	0.81
0.132	0.341	0.074	0.124	0.254	0.035	0.17	1.013	0.436	0.567	0.631	0.784		0.133	0.343	0.082	0.134	0.267	0.046	0.182	1.025	0.447	0.578	0.639	0.785		0.133	0.347	0.09	0.144	0.279	0.056	0.192	1.035	0.457	0.587	0.646	0.785
0.187	0.402	0.325	0.138	-0.011	0.634	0.002	0.039	-0.003	0.283	0.04	0.097		0.187	0.402	0.326	0.139	-0.01	0.635	0.003	0.04	-0.002	0.301	0.041	0.098		0.187	0.402	0.326	0.139	-0.01	0.635	0.003	0.04	-0.002	0.314	0.041	0.098
RepA1-144h	OD												RepA2-144h	OD												RepA3-144h	OD
0	0.489	-0.002	0.99	-0.025	0.054	0.452	0.098	0.518	0.115	0.608	0.551		0	0.489	-0.003	0.99	-0.026	0.054	0.451	0.097	0.518	0.115	0.608	0.55		0	0.489	-0.003	0.99	-0.026	0.053	0.451	0.097	0.518	0.115	0.608	0.55
-0.017	0.089	0.398	0.012	0.716	-0.053	0.732	-0.056	0.539	0.321	0.351	0.676		-0.017	0.093	0.406	0.019	0.725	-0.045	0.74	-0.048	0.547	0.33	0.359	0.676		-0.017	0.097	0.413	0.027	0.732	-0.037	0.747	-0.04	0.554	0.339	0.367	0.676
0.032	-0.026	-0.001	0.169	0.718	-0.027	0.004	0.139	0.018	0.704	0.389	0.504		0.032	-0.019	0.008	0.177	0.726	-0.02	0.013	0.147	0.026	0.713	0.398	0.503		0.032	-0.012	0.016	0.185	0.733	-0.012	0.022	0.154	0.034	0.72	0.407	0.503
0.683	0.668	0.043	-0.007	0.003	0.59	0.155	0.733	0.597	0.089	-0.003	0.799		0.683	0.674	0.052	0.001	0.012	0.598	0.164	0.741	0.605	0.098	0.007	0.799		0.683	0.68	0.06	0.009	0.02	0.606	0.173	0.748	0.613	0.107	0.016	0.799
-0.012	0.205	0.017	0.722	0.237	0.018	0.729	0.034	0.53	0.156	0.091	0.969		-0.012	0.212	0.025	0.73	0.245	0.028	0.737	0.043	0.539	0.166	0.102	0.97		-0.012	0.22	0.034	0.737	0.253	0.037	0.745	0.051	0.548	0.174	0.111	0.97
0.445	0.003	0.051	0.429	0.088	0.343	0.061	0.094	0.147	0.097	0.031	0.616		0.445	0.011	0.059	0.438	0.098	0.353	0.072	0.106	0.158	0.107	0.039	0.616		0.445	0.018	0.068	0.446	0.107	0.363	0.082	0.116	0.168	0.116	0.048	0.616
0.147	0.326	0.087	0.16	0.28	0.088	0.223	1.004	0.498	0.6	0.596	0.714		0.147	0.33	0.095	0.169	0.292	0.099	0.233	1.014	0.509	0.61	0.604	0.715		0.147	0.333	0.103	0.179	0.302	0.108	0.243	1.024	0.519	0.619	0.612	0.715
0.214	0.47	0.377	0.157	0.001	0.701	0.01	0.038	0.003	0.26	0.058	0.161		0.214	0.47	0.378	0.157	0.001	0.701	0.01	0.038	0.004	0.278	0.058	0.162		0.214	0.469	0.378	0.157	0.001	0.701	0.01	0.038	0.004	0.29	0.058	0.162
RepA1-168h	OD												RepA2-168h	OD												RepA3-168h	OD
0	0.471	0.006	0.931	-0.018	0.063	0.475	0.116	0.569	0.13	0.673	0.538		0	0.471	0.006	0.931	-0.018	0.063	0.475	0.116	0.569	0.13	0.673	0.538		0	0.471	0.006	0.931	-0.018	0.063	0.475	0.116	0.569	0.13	0.673	0.537
-0.016	0.099	0.423	0.046	0.774	-0.026	0.774	-0.026	0.622	0.397	0.408	0.714		-0.016	0.097	0.429	0.052	0.78	-0.02	0.78	-0.021	0.628	0.403	0.412	0.714		-0.016	0.095	0.432	0.056	0.784	-0.017	0.783	-0.018	0.631	0.406	0.413	0.714
0.039	-0.001	0.03	0.216	0.749	0	0.034	0.201	0.051	0.755	0.4	0.588		0.04	0.003	0.037	0.223	0.755	0.006	0.04	0.208	0.057	0.761	0.406	0.588		0.04	0.005	0.041	0.226	0.759	0.009	0.044	0.211	0.06	0.765	0.409	0.587
0.738	0.683	0.073	0.024	0.034	0.702	0.213	0.822	0.626	0.145	0.027	0.96		0.738	0.687	0.08	0.03	0.041	0.709	0.22	0.827	0.632	0.152	0.033	0.961		0.738	0.69	0.084	0.034	0.045	0.712	0.225	0.831	0.636	0.156	0.036	0.96
-0.012	0.216	0.044	0.856	0.302	0.058	0.757	0.062	0.598	0.218	0.134	1.007		-0.012	0.22	0.051	0.862	0.308	0.065	0.764	0.069	0.605	0.225	0.14	1.007		-0.013	0.222	0.055	0.865	0.312	0.069	0.768	0.072	0.609	0.229	0.144	1.006
0.609	0.041	0.088	0.498	0.126	0.441	0.111	0.145	0.209	0.265	0.063	0.666		0.609	0.045	0.095	0.505	0.133	0.447	0.119	0.153	0.216	0.272	0.067	0.667		0.61	0.046	0.099	0.509	0.138	0.452	0.124	0.157	0.221	0.276	0.069	0.667
0.167	0.303	0.123	0.248	0.34	0.172	0.312	1.048	0.622	0.665	0.535	0.658		0.167	0.301	0.128	0.255	0.348	0.177	0.317	1.055	0.629	0.671	0.537	0.658		0.167	0.299	0.13	0.258	0.352	0.181	0.319	1.058	0.633	0.674	0.538	0.658
0.232	0.511	0.434	0.185	0.019	0.82	0.027	0.051	0.013	0.257	0.074	0.197		0.232	0.511	0.434	0.184	0.018	0.821	0.027	0.051	0.014	0.248	0.074	0.197		0.232	0.512	0.434	0.184	0.018	0.82	0.027	0.05	0.013	0.234	0.073	0.196
RepA1-192h	OD												RepA2-192h	OD												RepA3-192h	OD
0	0.478	0.048	0.891	0.025	0.109	0.527	0.17	0.629	0.185	0.766	0.568		0	0.478	0.048	0.891	0.026	0.109	0.527	0.171	0.63	0.185	0.768	0.568		0	0.478	0.048	0.891	0.026	0.109	0.527	0.171	0.63	0.185	0.768	0.568
0.018	0.121	0.426	0.055	0.792	-0.019	0.788	-0.017	0.667	0.441	0.438	0.777		0.018	0.122	0.432	0.061	0.799	-0.012	0.795	-0.01	0.674	0.449	0.443	0.777		0.017	0.122	0.438	0.067	0.806	-0.006	0.8	-0.004	0.68	0.456	0.448	0.777
0.081	0.009	0.032	0.236	0.746	0.006	0.038	0.249	0.065	0.756	0.4	0.657		0.08	0.014	0.04	0.244	0.754	0.013	0.047	0.257	0.072	0.765	0.407	0.656		0.08	0.018	0.046	0.25	0.76	0.02	0.054	0.262	0.079	0.772	0.414	0.656
0.788	0.685	0.07	0.027	0.038	0.796	0.253	0.894	0.641	0.178	0.043	1.075		0.789	0.691	0.078	0.035	0.046	0.804	0.261	0.902	0.649	0.187	0.05	1.075		0.789	0.695	0.085	0.042	0.053	0.809	0.268	0.908	0.655	0.194	0.057	1.075
0.02	0.209	0.045	0.95	0.348	0.064	0.761	0.065	0.657	0.242	0.157	1.065		0.02	0.215	0.054	0.958	0.356	0.073	0.769	0.073	0.666	0.251	0.165	1.066		0.02	0.22	0.06	0.963	0.362	0.081	0.775	0.08	0.673	0.258	0.172	1.066
0.756	0.065	0.099	0.51	0.13	0.456	0.124	0.154	0.232	0.541	0.086	0.668		0.757	0.071	0.107	0.519	0.139	0.466	0.134	0.165	0.242	0.551	0.093	0.67		0.757	0.075	0.113	0.525	0.147	0.473	0.142	0.173	0.25	0.558	0.098	0.67
0.214	0.369	0.135	0.302	0.35	0.209	0.373	1.065	0.714	0.708	0.504	0.647		0.214	0.371	0.141	0.31	0.361	0.219	0.382	1.075	0.723	0.717	0.509	0.648		0.214	0.371	0.146	0.317	0.368	0.225	0.388	1.081	0.731	0.724	0.512	0.648
0.244	0.564	0.506	0.242	0.065	0.954	0.077	0.1	0.054	0.237	0.117	0.198		0.245	0.565	0.507	0.243	0.065	0.954	0.078	0.101	0.055	0.245	0.118	0.199		0.244	0.565	0.506	0.243	0.066	0.954	0.078	0.101	0.055	0.248	0.118	0.199

## Sheet: G18B
RepB1-0h	OD												RepB2-0h	OD												RepB3-0h	OD
0	0.039	-0.019	-0.014	-0.019	-0.008	-0.003	-0.021	-0.007	-0.007	0.01	-0.024		0	0.038	-0.019	-0.013	-0.019	-0.007	-0.002	-0.021	-0.007	-0.007	0.01	-0.023		0	0.038	-0.019	-0.013	-0.019	-0.008	-0.003	-0.021	-0.007	-0.007	0.01	-0.023
0.023	-0.004	0.066	-0.046	-0.047	-0.048	-0.049	-0.049	-0.057	-0.049	-0.041	-0.031		0.023	-0.004	0.067	-0.045	-0.046	-0.048	-0.049	-0.049	-0.057	-0.049	-0.04	-0.031		0.023	-0.004	0.067	-0.045	-0.047	-0.048	-0.049	-0.049	-0.057	-0.048	-0.04	-0.03
-0.043	-0.029	-0.025	-0.013	-0.019	-0.032	-0.037	-0.041	-0.042	-0.041	-0.045	-0.044		-0.042	-0.029	-0.025	-0.025	-0.017	-0.031	-0.046	-0.046	-0.042	-0.041	-0.044	-0.044		-0.042	-0.029	-0.026	-0.03	-0.016	-0.031	-0.049	-0.047	-0.042	-0.041	-0.044	-0.043
-0.049	-0.043	-0.017	-0.032	-0.043	-0.032	-0.036	-0.026	-0.045	-0.047	-0.056	-0.048		-0.049	-0.043	-0.03	-0.042	-0.043	-0.032	-0.035	-0.039	-0.045	-0.046	-0.056	-0.048		-0.049	-0.043	-0.037	-0.045	-0.043	-0.032	-0.035	-0.04	-0.045	-0.046	-0.056	-0.047
-0.004	-0.026	0.014	0.003	0.043	-0.006	-0.011	-0.021	-0.024	-0.03	-0.024	-0.026		-0.004	-0.026	-0.003	0.001	0.025	-0.008	-0.01	-0.022	-0.025	-0.03	-0.024	-0.026		-0.004	-0.025	-0.01	0.001	0.006	-0.008	-0.01	-0.022	-0.025	-0.03	-0.023	-0.025
-0.061	-0.046	-0.03	-0.044	-0.004	-0.03	-0.041	-0.031	-0.061	-0.054	-0.057	-0.048		-0.06	-0.046	-0.046	-0.043	-0.018	-0.046	-0.042	-0.037	-0.06	-0.054	-0.056	-0.048		-0.06	-0.046	-0.052	-0.043	-0.034	-0.047	-0.042	-0.037	-0.06	-0.054	-0.056	-0.047
-0.048	0.066	-0.047	-0.047	-0.048	-0.05	-0.037	-0.044	-0.049	-0.053	-0.054	-0.058		-0.048	0.066	-0.047	-0.048	-0.049	-0.049	-0.037	-0.044	-0.048	-0.052	-0.054	-0.058		-0.048	0.066	-0.047	-0.048	-0.049	-0.049	-0.037	-0.044	-0.048	-0.052	-0.053	-0.058
-0.036	-0.044	0.213	-0.043	-0.035	-0.043	-0.051	0	-0.037	1.276	-0.053	-0.05		-0.036	-0.044	0.215	-0.043	-0.035	-0.043	-0.051	0.001	-0.037	1.275	-0.053	-0.05		-0.035	-0.044	0.217	-0.042	-0.034	-0.042	-0.05	0.001	-0.036	1.274	-0.052	-0.05
RepB1-24h	OD												RepB2-24h	OD												RepB3-24h	OD
0	0.081	-0.008	0.023	-0.007	0.008	0.027	-0.004	0.03	0.024	0.034	0.049		0	0.073	-0.017	0.018	-0.014	0.008	0.026	-0.005	0.025	0.024	0.034	0.049		0	0.073	-0.018	0.007	-0.017	0.008	0.026	-0.005	0.025	0.024	0.034	0.049
0.042	0.073	0.178	0.032	0.076	0.006	0.044	-0.044	0.05	0.036	-0.055	0.075		0.035	0.073	0.18	0.034	0.078	0.007	0.045	-0.044	0.051	0.036	-0.06	0.075		0.034	0.071	0.18	0.034	0.078	0.007	0.045	-0.044	0.052	0.034	-0.069	0.075
-0.024	0.027	-0.018	0.04	0.115	0.032	0.012	0.018	0.02	0.024	0.059	0.014		-0.025	0.028	-0.017	0.042	0.116	0.034	0.014	0.02	0.022	0.026	0.058	0.014		-0.026	0.027	-0.017	0.042	0.116	0.034	0.014	0.021	0.023	0.027	0.056	0.014
0.006	0.131	0.034	0.012	0.023	0.056	0.047	0.062	0.057	0.047	-0.015	-0.028		0.007	0.132	0.036	0.014	0.026	0.059	0.049	0.064	0.059	0.05	-0.016	-0.028		0.007	0.131	0.036	0.014	0.026	0.059	0.05	0.064	0.06	0.05	-0.019	-0.028
-0.023	0.064	0.045	0.113	0.072	0.051	0.147	-0.016	0.12	0.035	0.023	0.023		-0.023	0.065	0.047	0.115	0.073	0.053	0.15	-0.013	0.122	0.038	0.021	0.024		-0.023	0.064	0.047	0.115	0.073	0.054	0.15	-0.013	0.123	0.039	0.018	0.024
-0.033	-0.016	0.01	0.042	0.045	0.001	0.023	0.043	0.006	0.005	-0.023	-0.022		-0.033	-0.014	0.012	0.043	0.046	0.002	0.024	0.045	0.009	0.007	-0.025	-0.022		-0.033	-0.015	0.012	0.043	0.046	0.003	0.025	0.046	0.009	0.007	-0.03	-0.022
-0.048	0.091	0.026	0.034	-0.004	0.007	0.042	0.05	0.035	0.022	-0.023	-0.027		-0.049	0.091	0.026	0.036	-0.003	0.008	0.043	0.052	0.036	0.022	-0.028	-0.027		-0.049	0.089	0.025	0.036	-0.003	0.008	0.042	0.051	0.035	0.021	-0.03	-0.027
-0.005	-0.014	0.235	0.005	-0.001	-0.025	-0.046	-0.006	-0.025	-0.002	-0.045	-0.059		-0.004	-0.018	0.228	0	-0.007	-0.025	-0.046	-0.006	-0.025	-0.002	-0.045	-0.059		-0.004	-0.018	0.221	-0.007	-0.019	-0.025	-0.046	-0.006	-0.025	-0.002	-0.045	-0.059
RepB1-48h	OD												RepB2-48h	OD												RepB3-48h	OD
0	0.299	0.016	0.241	0.018	0.067	0.195	0.062	0.211	0.131	0.187	0.291		0	0.299	0.019	0.246	0.023	0.071	0.199	0.067	0.216	0.135	0.19	0.293		0	0.296	0.019	0.247	0.024	0.072	0.2	0.069	0.217	0.136	0.191	0.293
0.032	0.166	0.423	0.066	0.348	0.043	0.254	-0.025	0.301	0.18	0.063	0.404		0.031	0.172	0.43	0.073	0.355	0.05	0.262	-0.018	0.309	0.188	0.069	0.406		0.029	0.174	0.433	0.077	0.358	0.055	0.266	-0.014	0.314	0.193	0.073	0.405
-0.015	0.039	0.023	0.156	0.348	0.07	0.049	0.096	0.061	0.183	0.347	0.26		-0.015	0.045	0.029	0.165	0.355	0.078	0.057	0.104	0.069	0.191	0.356	0.262		-0.016	0.048	0.032	0.169	0.359	0.082	0.062	0.108	0.074	0.196	0.361	0.262
0.186	0.455	0.102	0.045	0.06	0.224	0.124	0.283	0.33	0.146	0.017	0.097		0.187	0.462	0.111	0.053	0.068	0.232	0.133	0.291	0.339	0.155	0.026	0.099		0.186	0.466	0.115	0.058	0.073	0.237	0.138	0.296	0.343	0.16	0.031	0.099
0.015	0.213	0.083	0.311	0.195	0.094	0.421	0.022	0.417	0.083	0.086	0.243		0.016	0.221	0.091	0.318	0.203	0.103	0.429	0.03	0.425	0.092	0.095	0.245		0.016	0.226	0.095	0.322	0.207	0.108	0.434	0.034	0.43	0.097	0.1	0.245
0.023	0.046	0.07	0.153	0.076	0.066	0.075	0.099	0.063	0.048	0.018	0.419		0.023	0.053	0.078	0.161	0.083	0.074	0.085	0.108	0.072	0.057	0.026	0.421		0.021	0.057	0.082	0.166	0.087	0.08	0.09	0.114	0.077	0.063	0.031	0.422
-0.049	0.148	0.094	0.109	0.052	0.041	0.078	0.348	0.173	0.122	0.25	0.196		-0.049	0.155	0.103	0.118	0.061	0.051	0.088	0.358	0.183	0.131	0.257	0.199		-0.05	0.159	0.107	0.124	0.067	0.056	0.094	0.365	0.189	0.136	0.261	0.199
0.044	0.09	0.254	0.081	0.05	0.082	-0.018	0.048	-0.013	-0.008	-0.048	-0.059		0.046	0.093	0.259	0.086	0.055	0.086	-0.015	0.051	-0.01	-0.007	-0.046	-0.058		0.046	0.092	0.26	0.089	0.057	0.086	-0.015	0.051	-0.011	-0.009	-0.046	-0.058
RepB1-72h	OD												RepB2-72h	OD												RepB3-72h	OD
0	0.436	0.011	0.722	0.002	0.075	0.326	0.07	0.395	0.125	0.331	0.528		0	0.435	0.013	0.726	0.006	0.079	0.33	0.075	0.4	0.128	0.333	0.53		0	0.435	0.012	0.727	0.007	0.08	0.331	0.077	0.401	0.128	0.332	0.53
0.015	0.14	0.494	0.037	0.585	0.009	0.503	-0.039	0.489	0.238	0.196	0.659		0.014	0.146	0.502	0.046	0.594	0.019	0.512	-0.03	0.499	0.249	0.204	0.66		0.014	0.148	0.507	0.052	0.599	0.025	0.517	-0.025	0.505	0.255	0.209	0.661
0	0.018	0.02	0.184	0.564	0.05	0.029	0.11	0.056	0.36	0.465	0.377		-0.001	0.027	0.027	0.194	0.572	0.06	0.039	0.12	0.065	0.37	0.475	0.378		-0.001	0.032	0.032	0.201	0.577	0.065	0.045	0.125	0.071	0.376	0.481	0.378
0.397	0.715	0.093	0.027	0.047	0.39	0.141	0.505	0.567	0.103	-0.002	0.299		0.398	0.721	0.095	0.033	0.057	0.401	0.151	0.514	0.576	0.114	0.008	0.301		0.398	0.725	0.1	0.038	0.063	0.407	0.158	0.52	0.582	0.121	0.014	0.301
0.023	0.278	0.074	0.483	0.253	0.078	0.614	0.026	0.572	0.094	0.084	0.576		0.024	0.288	0.083	0.49	0.262	0.088	0.623	0.035	0.581	0.105	0.092	0.578		0.024	0.294	0.088	0.495	0.268	0.095	0.629	0.041	0.587	0.112	0.098	0.578
0.121	0.046	0.087	0.248	0.073	0.102	0.058	0.097	0.059	0.045	0.009	0.705		0.122	0.056	0.096	0.258	0.082	0.113	0.07	0.109	0.07	0.056	0.02	0.707		0.122	0.062	0.102	0.265	0.088	0.119	0.077	0.116	0.077	0.063	0.026	0.707
-0.06	0.193	0.109	0.105	0.181	0.025	0.106	0.907	0.325	0.468	0.42	0.477		-0.059	0.203	0.119	0.118	0.193	0.036	0.118	0.919	0.338	0.48	0.429	0.479		-0.059	0.208	0.125	0.125	0.201	0.044	0.126	0.927	0.346	0.487	0.434	0.479
0.113	0.178	0.202	0.092	0.036	0.276	-0.032	0.031	-0.004	-0.008	-0.04	-0.056		0.114	0.178	0.208	0.1	0.044	0.28	-0.03	0.034	-0.002	-0.006	-0.039	-0.055		0.114	0.179	0.211	0.104	0.047	0.28	-0.029	0.035	-0.003	-0.007	-0.039	-0.054
RepB1-96h	OD												RepB2-96h	OD												RepB3-96h	OD
0	0.446	0.011	0.894	0	0.082	0.369	0.076	0.475	0.124	0.409	0.6		0	0.442	0.011	0.896	0.002	0.084	0.371	0.078	0.476	0.124	0.409	0.601		0	0	0	0	0	0	0	0	0	0	0	0
0.024	0.148	0.515	0.084	0.677	0.054	0.598	-0.006	0.561	0.31	0.269	0.691		0.018	0.15	0.519	0.089	0.682	0.059	0.603	-0.002	0.566	0.316	0.274	0.692		0	0	0	0	0	0	0	0	0	0	0	0
0.01	0.055	0.063	0.245	0.674	0.088	0.072	0.168	0.098	0.493	0.479	0.384		0.007	0.06	0.068	0.251	0.679	0.093	0.077	0.172	0.103	0.498	0.485	0.385		0	0	0	0	0	0	0	0	0	0	0	0
0.487	0.818	0.14	0.075	0.092	0.502	0.207	0.62	0.62	0.157	0.032	0.39		0.486	0.822	0.146	0.08	0.098	0.508	0.213	0.625	0.626	0.163	0.039	0.391		0	0	0	0	0	0	0	0	0	0	0	0
0.024	0.312	0.11	0.595	0.32	0.123	0.726	0.077	0.643	0.169	0.131	0.723		0.022	0.318	0.116	0.599	0.325	0.128	0.732	0.083	0.649	0.176	0.138	0.724		0	0	0	0	0	0	0	0	0	0	0	0
0.177	0.097	0.138	0.355	0.123	0.185	0.123	0.169	0.125	0.112	0.045	0.695		0.174	0.103	0.144	0.36	0.127	0.191	0.129	0.175	0.13	0.118	0.05	0.696		0	0	0	0	0	0	0	0	0	0	0	0
-0.056	0.257	0.169	0.168	0.316	0.079	0.194	0.979	0.419	0.68	0.509	0.598		-0.06	0.262	0.174	0.175	0.323	0.086	0.201	0.985	0.425	0.687	0.514	0.599		0	0	0	0	0	0	0	0	0	0	0	0
0.143	0.274	0.222	0.127	0.048	0.403	-0.019	0.042	0.026	0.015	-0.021	-0.042		0.144	0.275	0.226	0.131	0.052	0.404	-0.019	0.042	0.026	0.012	-0.02	-0.041		0	0	0	0	0	0	0	0	0	0	0	0
RepB1-120h	OD												RepB2-120h	OD												RepB3-120h	OD
0	0.404	0.003	1.038	-0.001	0.085	0.432	0.087	0.56	0.124	0.532	0.689		0	0.404	0.005	1.038	-0.002	0.085	0.432	0.086	0.56	0.126	0.532	0.689		0	0.403	0.006	1.037	-0.005	0.083	0.43	0.084	0.558	0.125	0.533	0.688
0.01	0.135	0.471	0.057	0.755	0.017	0.671	-0.032	0.573	0.339	0.342	0.694		0.01	0.135	0.467	0.052	0.751	0.011	0.668	-0.037	0.567	0.333	0.338	0.694		0.01	0.131	0.46	0.044	0.744	0.003	0.66	-0.043	0.559	0.325	0.331	0.693
0.013	0.02	0.034	0.233	0.737	0.052	0.04	0.167	0.065	0.614	0.429	0.407		0.013	0.015	0.029	0.227	0.733	0.047	0.034	0.162	0.06	0.609	0.424	0.407		0.013	0.007	0.021	0.219	0.727	0.039	0.026	0.154	0.052	0.601	0.416	0.406
0.56	0.83	0.108	0.039	0.06	0.567	0.187	0.689	0.591	0.143	0.002	0.537		0.559	0.826	0.103	0.034	0.054	0.562	0.181	0.683	0.586	0.137	-0.003	0.537		0.56	0.82	0.095	0.026	0.045	0.554	0.173	0.676	0.578	0.128	-0.012	0.536
0.017	0.259	0.073	0.698	0.334	0.083	0.752	0.04	0.654	0.183	0.12	0.883		0.017	0.253	0.068	0.694	0.329	0.078	0.747	0.035	0.648	0.177	0.114	0.883		0.016	0.245	0.06	0.687	0.321	0.069	0.739	0.027	0.641	0.168	0.106	0.882
0.305	0.078	0.116	0.445	0.098	0.25	0.106	0.158	0.11	0.125	0.035	0.665		0.305	0.073	0.11	0.439	0.092	0.244	0.1	0.152	0.103	0.118	0.031	0.665		0.305	0.064	0.102	0.431	0.084	0.235	0.091	0.143	0.094	0.109	0.023	0.665
-0.064	0.271	0.165	0.153	0.321	0.061	0.216	0.892	0.445	0.714	0.447	0.561		-0.064	0.267	0.16	0.147	0.314	0.055	0.209	0.887	0.438	0.708	0.446	0.56		-0.063	0.258	0.152	0.137	0.305	0.045	0.2	0.877	0.428	0.699	0.442	0.56
0.195	0.398	0.268	0.141	0.041	0.392	-0.021	0.024	0.03	0.022	0.01	0.012		0.195	0.4	0.266	0.138	0.039	0.394	-0.02	0.026	0.033	0.022	0.01	0.012		0.194	0.398	0.261	0.131	0.033	0.393	-0.02	0.025	0.035	0.022	0.01	0.012
RepB1-144h	OD												RepB2-144h	OD												RepB3-144h	OD
0	0.393	0.027	1.029	0.015	0.104	0.475	0.11	0.644	0.161	0.621	0.688		0	0.389	0.026	1.031	0.018	0.106	0.477	0.113	0.646	0.162	0.622	0.689		0	0.38	0.022	1.03	0.018	0.105	0.476	0.113	0.645	0.16	0.619	0.687
0.022	0.146	0.456	0.062	0.797	0.014	0.706	-0.033	0.64	0.386	0.413	0.691		0.017	0.149	0.461	0.07	0.802	0.021	0.713	-0.028	0.647	0.393	0.419	0.69		0.009	0.148	0.464	0.074	0.806	0.025	0.716	-0.024	0.651	0.398	0.422	0.688
0.029	0.021	0.031	0.244	0.772	0.047	0.037	0.191	0.065	0.697	0.433	0.423		0.026	0.029	0.038	0.252	0.778	0.054	0.044	0.198	0.072	0.704	0.44	0.422		0.021	0.033	0.041	0.256	0.781	0.058	0.048	0.202	0.076	0.708	0.443	0.42
0.637	0.831	0.103	0.036	0.059	0.631	0.196	0.748	0.587	0.165	0.022	0.668		0.637	0.838	0.11	0.043	0.067	0.638	0.204	0.754	0.594	0.173	0.03	0.668		0.634	0.841	0.114	0.047	0.071	0.642	0.209	0.758	0.599	0.178	0.034	0.667
0.021	0.244	0.063	0.792	0.373	0.081	0.764	0.032	0.684	0.222	0.154	0.95		0.019	0.252	0.071	0.798	0.38	0.088	0.771	0.039	0.69	0.23	0.161	0.95		0.014	0.256	0.074	0.802	0.384	0.093	0.775	0.044	0.695	0.235	0.166	0.949
0.47	0.09	0.12	0.486	0.104	0.338	0.116	0.177	0.132	0.253	0.067	0.655		0.468	0.098	0.128	0.494	0.112	0.346	0.125	0.185	0.141	0.262	0.072	0.655		0.462	0.103	0.132	0.498	0.116	0.351	0.13	0.191	0.146	0.267	0.076	0.654
-0.053	0.3	0.18	0.187	0.337	0.095	0.262	0.849	0.517	0.741	0.429	0.521		-0.055	0.307	0.188	0.195	0.346	0.104	0.271	0.858	0.526	0.75	0.432	0.521		-0.062	0.311	0.193	0.201	0.352	0.11	0.277	0.862	0.532	0.755	0.432	0.52
0.225	0.481	0.309	0.171	0.067	0.435	0.008	0.045	0.064	0.044	0.023	0.034		0.225	0.483	0.313	0.176	0.072	0.436	0.009	0.046	0.064	0.041	0.023	0.034		0.224	0.48	0.313	0.178	0.073	0.435	0.007	0.044	0.062	0.035	0.022	0.034
RepB1-168h	OD												RepB2-168h	OD												RepB3-168h	OD
0	0.354	0.03	0.97	0.029	0.111	0.506	0.123	0.701	0.159	0.649	0.072		0	0.35	0.02	0.967	0.027	0.106	0.502	0.119	0.696	0.147	0.648	0.071		0	0.35	0.005	0.963	0.022	0.099	0.497	0.113	0.688	0.134	0.648	0.072
0.001	0.153	0.465	0.091	0.831	0.034	0.736	-0.018	0.715	0.445	0.435	0.68		-0.003	0.152	0.471	0.1	0.839	0.044	0.744	-0.012	0.724	0.454	0.432	0.681		-0.003	0.147	0.472	0.104	0.842	0.047	0.746	-0.01	0.727	0.457	0.427	0.681
0.018	0.044	0.052	0.283	0.808	0.068	0.059	0.246	0.087	0.738	0.423	0.444		0.015	0.053	0.061	0.294	0.815	0.078	0.069	0.255	0.096	0.747	0.426	0.444		0.015	0.055	0.065	0.298	0.818	0.081	0.073	0.259	0.1	0.751	0.426	0.445
0.684	0.843	0.121	0.061	0.088	0.726	0.24	0.832	0.601	0.206	0.037	0.722		0.673	0.851	0.131	0.071	0.098	0.736	0.25	0.841	0.611	0.217	0.041	0.722		0.667	0.853	0.135	0.075	0.102	0.74	0.255	0.845	0.616	0.222	0.041	0.723
0.001	0.256	0.084	0.9	0.443	0.11	0.779	0.047	0.726	0.274	0.177	0.983		-0.002	0.266	0.094	0.909	0.453	0.121	0.789	0.057	0.736	0.286	0.181	0.984		-0.002	0.268	0.098	0.912	0.457	0.126	0.793	0.062	0.74	0.291	0.181	0.984
0.56	0.133	0.151	0.507	0.136	0.42	0.153	0.218	0.176	0.467	0.072	0.748		0.556	0.142	0.162	0.518	0.146	0.432	0.165	0.23	0.188	0.478	0.07	0.749		0.556	0.145	0.166	0.522	0.151	0.436	0.17	0.235	0.193	0.484	0.066	0.748
-0.063	0.351	0.22	0.273	0.38	0.161	0.342	0.833	0.612	0.773	0.353	0.45		-0.069	0.359	0.23	0.284	0.393	0.173	0.355	0.843	0.622	0.78	0.342	0.45		-0.069	0.36	0.233	0.289	0.398	0.178	0.36	0.847	0.627	0.781	0.333	0.45
0.24	0.522	0.34	0.209	0.092	0.515	0.017	0.044	0.062	0.03	0.03	0.044		0.24	0.514	0.34	0.213	0.095	0.511	0.012	0.038	0.051	0.03	0.03	0.044		0.24	0.501	0.336	0.211	0.092	0.503	0.005	0.03	0.035	0.03	0.03	0.044
RepB1-192h	OD												RepB2-192h	OD												RepB3-192h	OD
0	0.326	0.01	0.863	0.011	0.094	0.512	0.106	0.711	0.162	0.704	-0.154		0	0.326	0.007	0.864	0.012	0.095	0.512	0.108	0.712	0.159	0.704	-0.154		0	0.326	0.001	0.863	0.011	0.093	0.511	0.107	0.711	0.154	0.704	-0.154
-0.006	0.107	0.415	0.041	0.795	-0.019	0.699	-0.062	0.709	0.431	0.402	0.682		-0.007	0.108	0.42	0.048	0.801	-0.012	0.705	-0.056	0.715	0.438	0.405	0.683		-0.007	0.106	0.422	0.052	0.805	-0.008	0.708	-0.052	0.72	0.443	0.405	0.683
0.02	-0.013	-0.001	0.236	0.774	0.016	0.009	0.245	0.047	0.691	0.376	0.436		0.019	-0.006	0.006	0.243	0.78	0.023	0.015	0.251	0.054	0.698	0.382	0.437		0.019	-0.002	0.01	0.249	0.783	0.028	0.02	0.256	0.059	0.703	0.385	0.438
0.689	0.788	0.06	0.01	0.032	0.752	0.208	0.854	0.557	0.183	0.004	0.754		0.688	0.793	0.067	0.017	0.04	0.759	0.216	0.861	0.564	0.191	0.01	0.754		0.688	0.797	0.072	0.022	0.045	0.764	0.221	0.865	0.57	0.196	0.014	0.755
-0.009	0.183	0.029	0.933	0.443	0.065	0.726	-0.006	0.706	0.247	0.154	0.531		-0.009	0.191	0.036	0.939	0.45	0.073	0.733	0.001	0.713	0.255	0.16	0.537		-0.009	0.195	0.041	0.943	0.455	0.078	0.737	0.007	0.718	0.261	0.164	0.537
0.636	0.093	0.101	0.438	0.08	0.385	0.104	0.172	0.141	0.455	0.045	0.452		0.635	0.1	0.108	0.446	0.087	0.393	0.112	0.18	0.148	0.463	0.049	0.456		0.635	0.105	0.113	0.451	0.093	0.398	0.118	0.186	0.154	0.468	0.05	0.457
-0.064	0.341	0.174	0.263	0.317	0.127	0.332	0.757	0.612	0.76	0.313	0.334		-0.064	0.346	0.181	0.271	0.326	0.135	0.341	0.764	0.62	0.766	0.31	0.334		-0.064	0.35	0.186	0.277	0.332	0.141	0.347	0.769	0.625	0.771	0.307	0.335
0.235	0.5	0.291	0.178	0.053	0.552	0.001	0.017	0.043	0.028	0.035	0.058		0.236	0.499	0.294	0.182	0.057	0.551	0	0.016	0.039	0.028	0.035	0.058		0.236	0.494	0.293	0.184	0.058	0.549	-0.002	0.014	0.034	0.028	0.035	0.058

[truncated: 3 more sheets: Cluster, R, AWCD]
